# Supplementary material for: A theoretical study of the oxidation of benzene by manganese oxide clusters: formation of quinone intermediates
Source: Royal Society of Chemistry journal article supplement (doi:10.1039/d3cp05207a), 2024-01-01
Supplement: d3cp05207a1.pdf [file d3cp05207a1.pdf]

## Supplementary Information (SI)

### A Theoretical Study of the Oxidation of Benzene by Manganese Oxide Clusters: Formation of Quinone Intermediates

Giang Huong Thi Vu,<sup>1</sup> Phan Thi Thuy,<sup>2</sup> Huu Tho Nguyen,<sup>3</sup> Minh Thang Le,<sup>4</sup>  
Minh Tho Nguyen<sup>5,6</sup> and Hue Minh Thi Nguyen<sup>1,\*</sup>

<sup>1</sup> Faculty of Chemistry and Center for Computational Science, Hanoi National University of Education, Cau Giay, Hanoi, 10000 Vietnam. Email: hue.nguyen@hnue.edu.vn

<sup>2</sup> Faculty of Chemistry, Vinh University, Vinh City, Vietnam

<sup>3</sup> Faculty of Natural Sciences Education, Saigon University, Ho Chi Minh City, Vietnam

<sup>4</sup> School of Chemical Engineering, Hanoi University of Science and Technology, Hanoi, Viet Nam

<sup>5</sup> Laboratory for Chemical Computation and Modeling, Institute for Computational Science and Artificial Intelligence, Van Lang University, Ho Chi Minh City, Vietnam

<sup>6</sup> Faculty of Applied Technology, School of Technology, Van Lang University, Ho Chi Minh City, Vietnam

#### Content

|                                                                                                                                                                                                                                                               |    |
|---------------------------------------------------------------------------------------------------------------------------------------------------------------------------------------------------------------------------------------------------------------|----|
| <b>Table S1.</b> Calculated equilibrium geometry, vibrational frequencies ( $\text{cm}^{-1}$ ) and adiabatic electron affinity (EA, eV) of the ground state ( $^4B_1$ ) of $\text{MnO}_2$ .....                                                               | S2 |
| <b>Table S2.</b> Calculated the first vertical ionization energy (IE, eV), electron affinity (EA, eV) and proton affinity (PA, eV) of $\text{C}_6\text{H}_6$ .....                                                                                            | S3 |
| <b>Table S3.</b> Comparison of calculated heats of reaction ( $\text{kcal mol}^{-1}$ ) of some products of the $\text{C}_6\text{H}_6 + \text{O}_2$ reaction, in this work with available data at 298.15 K. ....                                               | S3 |
| <b>Table S4.</b> Comparison of calculated heats of reaction ( $\text{kcal mol}^{-1}$ ) of some products of the $\text{C}_6\text{H}_6 + \text{Mn}_2\text{O}_3 + \text{O}_2$ reaction in this work with available data at 298.15 K.....                         | S3 |
| <b>Table S5.</b> Job cpu time to optimize the intermediate IM1 at PBE level with basis set 6-311++g(d,p) for C, H, O and different basis sets for Mn atom.....                                                                                                | S4 |
| <b>Table S6.</b> Theoretical predication of detailed energies for intermediates, transition states, and products of the $\text{C}_6\text{H}_6 + \text{O}_2$ gas phase reaction calculated at PBE/6-311++g(d,p) level. ZPE energies are reported unscaled..... | S4 |
| <b>Table S7.</b> Cartesian coordinates ( $\text{\AA}$ ) for the reactants, intermediates, transition states, and products in the interaction of the $\text{C}_6\text{H}_6$ with $\text{O}_2$ by the method PBE/6-311++g(d,p).....                             | S5 |

**Table S8.** Theoretical predictions of detailed energies of reactants and intermediates in the interaction of the C<sub>6</sub>H<sub>6</sub> with MnO<sub>x</sub> cluster by the method PBE-D3/6-311++g(d,p) (H, C, O)/LandL2DZ (Mn) with the BSSE correction. ZPE energies are reported unscaled..... S13

**Table S9.** Cartesian coordinates (Å) for the reactants, intermediates, transition states, and products in the interaction of the C<sub>6</sub>H<sub>6</sub> with MnO<sub>x</sub> by the method PBE/6-311++g(d,p) (H, C, O)/ LandL2DZ (Mn). ..... S13

**Table S10.** Second Order Perturbation Theory Analysis of Fock Matrix in NBO Basis of structures A1, A2, A3, B1, B2, B3 ..... S34

**Table S11.** Theoretical predictions of detailed energies of reactants and intermediates, transition states, and products in the oxidation reaction of the C<sub>6</sub>H<sub>6</sub> and Mn<sub>2</sub>O<sub>3</sub> cluster by the method PBE/6-311++g(d,p) (H, C, O)/LandL2DZ (Mn). ZPE energies are reported unscaled..... S35

**Figure S1.** Optimized geometries of the intermediates and transition states of the C<sub>6</sub>H<sub>6</sub> + O<sub>2</sub> reaction in the gas phase. .... S41

**Figure S2.** The structures, point group symmetry, and the spin multiplicity of MnO<sub>x</sub> and C<sub>6</sub>H<sub>6</sub> ..... S41

**Figure S3.** The comparison of the atomic charges of the C<sub>6</sub>H<sub>6</sub>/MnO<sub>2</sub> and C<sub>6</sub>H<sub>6</sub>/Mn<sub>2</sub>O<sub>3</sub> systems obtained by NPA analysis. The unit of the charge is one electron charge e ..... S42

**Figure S4.** Optimized geometries (length is in Å and angle is in degree) of the reactants, transition states, and intermediates of the C<sub>6</sub>H<sub>6</sub> + O<sub>2</sub> reaction assisted by the Mn<sub>2</sub>O<sub>3</sub> cluster at the PBE/6-311++G(d,p)/LanL2DZ level. (Energy values in parenthesis are in kcal.mol<sup>-1</sup>)..... S47

**Figure S5.** The structures and relative energy (kcal.mol<sup>-1</sup>) of interaction configuration when O<sub>2</sub> interact with I7, I2, I4, I6, and I1 ..... S48

**Figure S6.** Atomic charges obtained by NPA analysis of the structures of transition states, intermediates and products appeared in the paths plotted in Fig. 6. The unit of the charge is one electron charge e S49

**Figure S7.** Optimized geometries (length is in Å and angle is in degree) of the reactants, transition states and intermediates of I6 + O<sub>2</sub> pathways at the PBE/6-311++G(d,p)/LanL2DZ level. (Energy values in parenthesis are in kcal.mol<sup>-1</sup>)..... S49

**Figure S8.** Profile of potential energy profile for the subsequent reaction pathways of I6 with O<sub>2</sub> at the PBE/6-311++G(d,p)/LanL2DZ level ..... S50

**Table S1.** Calculated equilibrium geometry, vibrational frequencies (cm<sup>-1</sup>) and adiabatic electron affinity (EA, eV) of the ground state (<sup>4</sup>B<sub>1</sub>) of MnO<sub>2</sub>

| Level of theory           | Equilibrium geometry |           | Vibrational frequencies (cm <sup>-1</sup> ) |         |         | EA (eV) |
|---------------------------|----------------------|-----------|---------------------------------------------|---------|---------|---------|
|                           | rMn-O (Å)            | <OMnO (°) | v1 (A1)                                     | v2 (A1) | v3 (B2) |         |
| <b>Expt.</b> <sup>1</sup> | 1.597                | 128.8     | 261.0                                       | 918.0   | 1012.0  | 2.060   |
| <b>PBE</b>                | 1.598                | 127.8     | 270.0                                       | 904.0   | 1008.0  | 2.008   |
| <b>BP86</b>               | 1.598                | 127.8     | 271.0                                       | 910.0   | 1013.0  | 2.113   |

<sup>1</sup> G.L. Gutsev, B.K. Rao, P. Jena, L. Xi, L.S. Wang, Experimental and theoretical study of the photoelectron spectra of MnO<sub>x</sub>- (x = 1 - 3) clusters, J. Chem. Phys. 113 (2000) 1473–1483.

|               |       |       |       |       |       |       |
|---------------|-------|-------|-------|-------|-------|-------|
| <b>B3LYP</b>  | 1.600 | 130   | 250.0 | 855.0 | 959.0 | 2.545 |
| <b>M06-2X</b> | 1.643 | 134.4 | 191.0 | 636.0 | 846.0 | 3.058 |

**Table S2.** Calculated the first vertical ionization energy (IE, eV), electron affinity (EA, eV) and proton affinity (PA, eV) of C<sub>6</sub>H<sub>6</sub>

| Level of theory | IE (eV)            | EA (eV)             | PA (eV)            |
|-----------------|--------------------|---------------------|--------------------|
| <b>Expt.</b>    | 9.244 <sup>2</sup> | -1.150 <sup>3</sup> | 7.780 <sup>4</sup> |
| <b>PBE</b>      | 9.254              | -0.594              | 7.875              |
| <b>BP86</b>     | 9.344              | -0.508              | 7.857              |
| <b>B3LYP</b>    | 9.262              | -0.528              | 8.164              |
| <b>M06-2X</b>   | 9.415              | -0.883              | 7.634              |

**Table S3.** Comparison of calculated heats of reaction (kcal mol<sup>-1</sup>) of some products of the C<sub>6</sub>H<sub>6</sub> + O<sub>2</sub> reaction, in this work with available data at 298.15 K.

| Reaction paths                                                                 | PBE/6-311++g(d,p) | NIST <sup>5</sup> |
|--------------------------------------------------------------------------------|-------------------|-------------------|
| C <sub>6</sub> H <sub>6</sub> + O <sub>2</sub> → catechol                      | -44.82            | -44.30            |
| C <sub>6</sub> H <sub>6</sub> + O <sub>2</sub> → resorcinol                    | -44.58            | -43.80            |
| C <sub>6</sub> H <sub>6</sub> + O <sub>2</sub> → hydroquinone                  | -42.56            | -44.20            |
| C <sub>6</sub> H <sub>6</sub> + O <sub>2</sub> → benzoquinone + H <sub>2</sub> | -41.80            | -40.67            |

**Table S4.** Comparison of calculated heats of reaction (kcal mol<sup>-1</sup>) of some products of the C<sub>6</sub>H<sub>6</sub> + Mn<sub>2</sub>O<sub>3</sub> + O<sub>2</sub> reaction in this work with available data at 298.15 K

| Reaction                                                                                                                  | PBE    | M06-2X | B3LYP  | BP86   | NIST   |
|---------------------------------------------------------------------------------------------------------------------------|--------|--------|--------|--------|--------|
| C <sub>6</sub> H <sub>6</sub> + Mn <sub>2</sub> O <sub>3</sub> + O <sub>2</sub> → hydroquinone                            | -76.42 | -84.13 | -74.24 | -75.14 | -76.77 |
| C <sub>6</sub> H <sub>6</sub> + Mn <sub>2</sub> O <sub>3</sub> + O <sub>2</sub> → <i>p</i> -benzoquinone + H <sub>2</sub> | -41.80 | -44.46 | -42.11 | -42.71 | -41.03 |
| C <sub>6</sub> H <sub>6</sub> + Mn <sub>2</sub> O <sub>3</sub> + O <sub>2</sub> → catechol                                | -78.69 | -86.78 | -76.39 | -77.34 | -77.44 |
| C <sub>6</sub> H <sub>6</sub> + Mn <sub>2</sub> O <sub>3</sub> + O <sub>2</sub> → <i>o</i> -benzoquinone + H <sub>2</sub> | -34.79 | -37.34 | -34.58 | -35.67 | -34.84 |

<sup>2</sup> webbook.nist.gov.

<sup>3</sup> N. Driver, P. Jena, Electron affinity of modified benzene, Int. J. Quantum Chem. 118 (2018) 1–10.

<sup>4</sup> E.P.L. Hunter, S.G. Lias, Evaluate Gas Phase Basicities and Proton Affinity of Molecules.Pdf, J. Phys. Chem. Ref. Data. 27 (1998) 413–656.

<sup>5</sup> Afeefy, H. Y.; Liebman, J. F.; Stein, S. E. Neutral Thermochemical Data. In NIST Chemistry WebBook; Linstrom, P. J., Mallard, W. G., Eds; NIST Standard Reference Database Number 69; National Institute of Standards and Technology: Gaithersburg, MD, <http://webbook.nist.gov>, (retrieved September 13, 2011).

**Table S5.** Job cpu time to optimize the intermediate IM1 at PBE level with basis set 6-311++g(d,p) for C, H, O and different basis sets for Mn atom

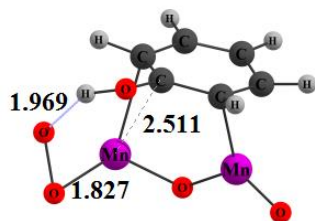

**IM1**

| Basis set for Mn   | CPU time                   | Single point energy (a.u) |
|--------------------|----------------------------|---------------------------|
| <b>LanL2DZ</b>     | 18 hours 51 minutes        | -815.59763                |
| <b>LanL2TZ</b>     | 1 days 1 hours 50 minutes  | -815.612294               |
| <b>cc-pvTZ</b>     | 2 days 22 hours 48 minutes | -2909.394603              |
| <b>cc-pvDZ</b>     | 2 days 27 hours 56 minutes | -2909.366325              |
| <b>Aug-cc-pvDZ</b> | 3 days 24 hours 41 minutes | -2909.375627              |

**Table S6.** Theoretical predication of detailed energies for intermediates, transition states, and products of the C<sub>6</sub>H<sub>6</sub> + O<sub>2</sub> gas phase reaction calculated at PBE/6-311++g(d,p) level. ZPE energies are reported unscaled

| Species                                                | Single point energy (a.u) | ZPE (a.u)  | Etotal (au) | Erelative (kcal.mol <sup>-1</sup> ) |
|--------------------------------------------------------|---------------------------|------------|-------------|-------------------------------------|
| C <sub>6</sub> H <sub>6</sub>                          | -231.9948881              | 0.0975380  | -231.897350 |                                     |
| O <sub>2</sub>                                         | -150.2295138              | 0.0035290  | -150.225985 |                                     |
| CO <sub>2</sub>                                        | -188.4572427              | 0.0113260  | -188.445917 |                                     |
| cyclopentadiene                                        | -193.8893934              | 0.0896370  | -193.799756 |                                     |
| C <sub>6</sub> H <sub>6</sub> +O <sub>2</sub>          | -382.22440187             | 0.10106700 | -382.123335 | 0.00                                |
| I1g                                                    | -382.52606469             | 0.104712   | -382.421353 | 28.09                               |
| I2g                                                    | -382.20349795             | 0.103128   | -382.100370 | 14.41                               |
| I3g                                                    | -382.20695210             | 0.103313   | -382.103639 | 12.36                               |
| I4                                                     | -382.26264918             | 0.101553   | -382.161096 | -23.70                              |
| I5g                                                    | -382.18266272             | 0.104590   | -382.078073 | 28.40                               |
| I6g                                                    | -382.24658535             | 0.105174   | -382.141411 | -11.34                              |
| I7g                                                    | -382.14406796             | 0.10292900 | -382.041139 | 51.58                               |
| I8g                                                    | -382.28193614             | 0.104843   | -382.177093 | -33.73                              |
| I9g                                                    | -382.42966548             | 0.104911   | -382.324754 | 35.01                               |
| I10g                                                   | -382.28280002             | 0.104858   | -382.177942 | -34.27                              |
| I11g                                                   | -382.18281852             | 0.104179   | -382.078640 | 28.05                               |
| I12g                                                   | -382.15915665             | 0.098295   | -382.060862 | 39.20                               |
| I13g                                                   | -382.21804957             | 0.10049200 | -382.117558 | 3.63                                |
| PR1g (CO <sub>2</sub> +C <sub>5</sub> H <sub>6</sub> ) | -382.22309722             | 0.09548300 | -382.127614 | -2.69                               |

|                                    |               |            |             |        |
|------------------------------------|---------------|------------|-------------|--------|
| PR2g-resorcinol                    | -382.35260703 | 0.105101   | -382.247506 | -77.92 |
| PR3g-p-benzoquinone+H <sub>2</sub> | -382.28370235 | 0.09177900 | -382.191923 | -43.04 |
| PR4g-hydroquinone                  | -382.34927909 | 0.104839   | -382.244440 | -75.99 |
| T0g/1g                             | -382.50121451 | 0.104094   | -382.397121 | 42.07  |
| T1g/2g                             | -382.13558374 | 0.099085   | -382.036499 | 54.49  |
| T2g/3g                             | -382.60973829 | 0.104454   | -382.505284 | 47.60  |
| T3/4                               | -382.20007338 | 0.100077   | -382.099996 | 14.65  |
| T4P1                               | -382.24310236 | 0.100318   | -382.142784 | -12.20 |
| T0g/5g                             | -382.14063067 | 0.101774   | -382.038857 | 53.01  |
| T5g/6g                             | -382.14982272 | 0.101709   | -382.048114 | 47.20  |
| T6g/7g                             | -382.13881289 | 0.099721   | -382.039092 | 52.86  |
| T7g/8g                             | -382.13479915 | 0.101536   | -382.033263 | 56.52  |
| T8gP2g                             | -382.18661440 | 0.099253   | -382.087361 | 22.57  |
| T6g/9g                             | -382.14457545 | 0.099449   | -382.045126 | 49.08  |
| T9g/10g                            | -382.13274812 | 0.101580   | -382.031168 | 57.84  |
| T10gP2g                            | -382.17906631 | 0.098488   | -382.080578 | 26.83  |
| T0g/11g                            | -382.16851621 | 0.102331   | -382.066185 | 35.86  |
| T12g/13g                           | -382.13643209 | 0.095312   | -382.041120 | 51.59  |
| T12gP3g                            | -382.13595206 | 0.091602   | -382.044350 | 49.56  |
| T13gP4g                            | -382.17619556 | 0.096116   | -382.080080 | 27.14  |
| I11g+O <sub>2</sub>                | -532.41233230 | 0.10770800 | -532.304624 | 0.00   |
| COM                                | -532.40046991 | 0.106056   | -532.294414 | 6.41   |
| T11g/COM                           | -532.37549400 | 0.105793   | -532.269701 | 21.91  |

**Table S7.** Cartesian coordinates (Å) for the reactants, intermediates, transition states, and products in the interaction of the C<sub>6</sub>H<sub>6</sub> with O<sub>2</sub> by the method PBE/6-311++g(d,p)

| 12                            |           |           |          | 14     |           |           |           |
|-------------------------------|-----------|-----------|----------|--------|-----------|-----------|-----------|
| C <sub>6</sub> H <sub>6</sub> |           |           |          | T0-16g |           |           |           |
| C                             | 0.000000  | 1.401025  | 0.000000 | C      | -0.513601 | 1.336561  | -0.691157 |
| C                             | 1.213323  | 0.700512  | 0.000000 | C      | -1.384102 | 0.288177  | -0.653269 |
| C                             | 1.213323  | -0.700512 | 0.000000 | C      | -0.829207 | -1.015344 | -0.271636 |
| C                             | 0.000000  | -1.401025 | 0.000000 | C      | 0.509895  | -1.337828 | -0.691321 |
| C                             | -1.213323 | -0.700512 | 0.000000 | C      | 1.380504  | -0.289358 | -0.658820 |
| C                             | -1.213323 | 0.700512  | 0.000000 | C      | 0.827351  | 1.014677  | -0.277185 |
| H                             | 0.000000  | 2.493924  | 0.000000 | H      | -0.838365 | 2.372309  | -0.796995 |
| H                             | 2.159801  | 1.246962  | 0.000000 | H      | -2.463602 | 0.409090  | -0.755352 |
| H                             | 2.159801  | -1.246962 | 0.000000 | H      | 0.834119  | -2.373702 | -0.797595 |
| H                             | 0.000000  | -2.493924 | 0.000000 | H      | 2.459524  | -0.410347 | -0.765766 |
| H                             | -2.159801 | -1.246962 | 0.000000 | O      | -0.551255 | -0.368597 | 1.424805  |

|                                   |           |           |           |               |           |           |           |
|-----------------------------------|-----------|-----------|-----------|---------------|-----------|-----------|-----------|
| H                                 | -2.159801 | 1.246962  | 0.000000  | O             | 0.559294  | 0.371359  | 1.421006  |
| <b>C<sub>5</sub>H<sub>6</sub></b> |           |           |           | H             | -1.534151 | -1.829967 | -0.090805 |
| C                                 | 0.995806  | -0.732765 | 0.000001  | H             | 1.533128  | 1.829209  | -0.099641 |
| C                                 | 0.995013  | 0.733950  | 0.000001  | 14            |           |           |           |
| C                                 | -0.287105 | 1.182050  | -0.000002 | <b>T0-1g</b>  |           |           |           |
| C                                 | -1.215324 | -0.000772 | 0.000002  | C             | -1.655147 | -1.106404 | -0.113652 |
| C                                 | -0.285671 | -1.182380 | -0.000002 | C             | -2.156760 | 0.197988  | -0.340623 |
| H                                 | 1.892837  | 1.353710  | 0.000001  | C             | -1.348687 | 1.323052  | -0.060658 |
| H                                 | -0.618142 | 2.220156  | -0.000002 | C             | -0.068791 | 1.168958  | 0.410994  |
| H                                 | -1.885063 | -0.001034 | 0.881350  | C             | 0.530596  | -0.165434 | 0.569159  |
| H                                 | -0.615304 | -2.220949 | -0.000003 | C             | -0.381132 | -1.300278 | 0.354652  |
| H                                 | 1.894430  | -1.351350 | 0.000000  | H             | -3.166710 | 0.333235  | -0.715194 |
| H                                 | -1.885072 | -0.001034 | -0.881340 | H             | -1.752596 | 2.320944  | -0.210324 |
| 3                                 |           |           |           | H             | 0.559258  | 2.028371  | 0.625957  |
| <b>CO<sub>2</sub></b>             |           |           |           | H             | 1.195793  | -0.266277 | 1.429180  |
| C                                 | 0.000000  | 0.000000  | 0.000000  | O             | 1.673562  | -0.276728 | -0.601112 |
| O                                 | 0.000000  | 0.000000  | 1.172289  | O             | 2.819334  | 0.169150  | -0.185510 |
| O                                 | 0.000000  | 0.000000  | -1.172289 | H             | -0.000203 | -2.300138 | 0.540341  |
| 16                                |           |           |           | H             | -2.299193 | -1.962797 | -0.296211 |
| <b>COM</b>                        |           |           |           | 14            |           |           |           |
| C                                 | -0.516441 | -0.000275 | -1.104341 | <b>T0-5g</b>  |           |           |           |
| C                                 | 0.170139  | 1.261743  | -0.641596 | C             | 0.192404  | -1.068703 | -0.693735 |
| C                                 | 1.391819  | 1.267109  | -0.087482 | C             | 0.728410  | 0.353923  | -0.804366 |
| C                                 | 2.192020  | 0.000042  | 0.127119  | C             | -1.090019 | -1.301552 | -0.232952 |
| C                                 | 1.391848  | -1.267141 | -0.086895 | C             | -0.203983 | 1.426748  | -0.349915 |
| C                                 | 0.170171  | -1.262065 | -0.641019 | H             | 1.206995  | 0.576004  | -1.773880 |
| H                                 | -0.398844 | 2.187382  | -0.768886 | C             | -1.816070 | -0.246012 | 0.344088  |
| H                                 | 1.867222  | 2.190818  | 0.252918  | H             | -1.493517 | -2.315657 | -0.215666 |
| H                                 | 2.952740  | -0.000149 | -0.726981 | C             | -1.359315 | 1.103563  | 0.311085  |
| H                                 | 1.867274  | -2.190683 | 0.253927  | H             | 0.138365  | 2.458999  | -0.444718 |
| O                                 | -1.908765 | -0.000236 | -0.863728 | H             | -2.778169 | -0.460049 | 0.817510  |
| O                                 | 3.043198  | 0.000293  | 1.179872  | H             | -1.972792 | 1.882220  | 0.770408  |
| H                                 | -0.398790 | -2.187774 | -0.767893 | H             | 0.782297  | -1.861149 | -1.158661 |
| H                                 | -0.522109 | -0.000526 | -2.223419 | O             | 1.800630  | 0.362996  | 0.207252  |
| O                                 | -2.110007 | 0.000221  | 0.853453  | O             | 1.375403  | -0.599017 | 1.112719  |
| O                                 | -3.295030 | 0.000279  | 1.153606  | 14            |           |           |           |
| 14                                |           |           |           | <b>T10P3g</b> |           |           |           |
| <b>Resorcinol</b>                 |           |           |           | C             | -0.292170 | -1.124487 | -0.384408 |

|                     |           |           |           |                 |           |           |           |
|---------------------|-----------|-----------|-----------|-----------------|-----------|-----------|-----------|
| C                   | -1.208098 | 1.121336  | 0.000197  | C               | 1.149103  | -0.821312 | -0.445839 |
| C                   | -1.219466 | -0.282678 | -0.000086 | C               | 1.583019  | 0.653163  | -0.420623 |
| C                   | -0.021980 | -1.008565 | -0.000192 | C               | 0.541110  | 1.601338  | -0.169455 |
| C                   | 1.199821  | -0.322154 | -0.000031 | C               | -0.750160 | 1.215314  | 0.113667  |
| C                   | 1.229892  | 1.079821  | -0.000077 | C               | -1.176676 | -0.154470 | -0.005162 |
| C                   | 0.019557  | 1.784856  | -0.000073 | H               | -0.658503 | -2.116161 | -0.658345 |
| H                   | -2.154088 | 1.664054  | 0.000657  | H               | 2.426667  | 0.125021  | 0.568093  |
| H                   | 2.185284  | 1.612293  | -0.000250 | H               | 0.802635  | 2.663726  | -0.167253 |
| H                   | 0.038199  | 2.877171  | -0.000021 | H               | -1.497032 | 1.967639  | 0.401031  |
| O                   | 2.339594  | -1.089934 | 0.000062  | H               | 1.719146  | -1.490485 | -1.104636 |
| H                   | 3.110226  | -0.497883 | 0.000593  | O               | 1.736978  | -0.734876 | 0.899547  |
| O                   | -2.445796 | -0.900799 | -0.000124 | O               | -2.500693 | -0.477733 | 0.163187  |
| H                   | -2.311144 | -1.863334 | 0.000817  | H               | -3.008543 | 0.333855  | 0.330156  |
| H                   | -0.017218 | -2.102125 | 0.000274  |                 |           |           |           |
| 14                  |           |           |           | 16              |           |           |           |
| <b>hydroquinone</b> |           |           |           | <b>T11-COMg</b> |           |           |           |
| C                   | -0.680916 | 1.223647  | -0.000013 | C               | 1.714073  | 0.891441  | 0.178456  |
| C                   | 0.716558  | 1.196764  | 0.000015  | C               | 2.119660  | -0.485099 | 0.710452  |
| C                   | 1.404893  | -0.025229 | 0.000028  | C               | 1.231785  | -1.458053 | 0.488345  |
| C                   | 0.680916  | -1.223647 | 0.000013  | C               | -0.000637 | -1.042839 | -0.329072 |
| C                   | -0.716558 | -1.196764 | -0.000015 | C               | 0.401524  | -0.205599 | -1.539018 |
| C                   | -1.404893 | 0.025229  | -0.000028 | C               | 1.268753  | 0.778190  | -1.289024 |
| H                   | -1.220970 | 2.171983  | -0.000023 | H               | 3.033425  | -0.610729 | 1.294745  |
| H                   | 1.273104  | 2.139239  | 0.000027  | H               | 1.277066  | -2.462845 | 0.910754  |
| H                   | 1.220970  | -2.171983 | 0.000023  | H               | -0.601584 | -1.929233 | -0.601659 |
| H                   | -1.273104 | -2.139239 | -0.000027 | H               | -0.067918 | -0.381594 | -2.509076 |
| O                   | -2.780837 | 0.111632  | -0.000056 | O               | 0.639774  | 1.391125  | 0.922398  |
| H                   | -3.148047 | -0.787298 | -0.000063 | O               | -0.750229 | -0.253216 | 0.583626  |
| O                   | 2.780837  | -0.111632 | 0.000055  | H               | 1.592404  | 1.525736  | -2.015211 |
| H                   | 3.148047  | 0.787298  | 0.000065  | H               | 2.533538  | 1.632184  | 0.281928  |
| 14                  |           |           |           | O               | -3.323376 | 0.546218  | 0.343777  |
| <b>I10g</b>         |           |           |           | O               | -2.588404 | -0.264347 | -0.185092 |
| C                   | -1.036730 | -1.031349 | -0.326212 | 14              |           |           |           |
| C                   | 0.421369  | -1.163518 | -0.286420 | <b>T12-13g</b>  |           |           |           |
| C                   | 1.193526  | -0.075231 | 0.003520  | C               | -1.502584 | 0.000000  | 0.256230  |
| C                   | 0.637730  | 1.263174  | 0.043449  | C               | -0.692658 | -1.270180 | 0.106300  |
| C                   | -0.684278 | 1.483745  | -0.173336 | C               | 0.655169  | -1.252734 | 0.005342  |
| C                   | -1.631198 | 0.364364  | -0.266182 | C               | 1.415313  | 0.000000  | 0.065190  |
|                     |           |           |           | C               | 0.655170  | 1.252734  | 0.005342  |

|             |           |           |           |               |           |           |           |
|-------------|-----------|-----------|-----------|---------------|-----------|-----------|-----------|
| H           | -1.602960 | -1.813528 | -0.844393 | C             | -0.692658 | 1.270180  | 0.106300  |
| H           | 1.343391  | 2.090214  | 0.150992  | H             | -1.265128 | -2.199269 | 0.053353  |
| H           | -1.060598 | 2.500950  | -0.307185 | H             | 1.229225  | -2.172034 | -0.138191 |
| H           | -2.602592 | 0.552421  | -0.737982 | H             | 2.258889  | 0.000000  | 0.971254  |
| H           | 0.871000  | -2.138695 | -0.495051 | H             | 1.229225  | 2.172034  | -0.138191 |
| O           | 2.556578  | -0.111413 | 0.161017  | O             | -2.688155 | 0.000000  | -0.420507 |
| O           | -1.707058 | -0.538966 | 0.860250  | O             | 2.772709  | 0.000000  | -0.254630 |
| H           | 2.853089  | -1.035439 | 0.094563  | H             | -1.265128 | 2.199269  | 0.053353  |
| 14          |           |           |           | H             | -1.890027 | 0.000000  | 1.331299  |
| <b>I11g</b> |           |           |           | 14            |           |           |           |
| C           | -1.233712 | 0.028334  | -0.072094 | <b>T1-2g</b>  |           |           |           |
| C           | -0.641953 | 1.270204  | -0.697376 | C             | -1.789651 | -1.007419 | -0.049277 |
| C           | 0.699603  | 1.239467  | -0.697340 | C             | -2.198533 | 0.366597  | -0.055207 |
| C           | 1.233712  | -0.028334 | -0.072094 | C             | -1.253263 | 1.378779  | -0.007199 |
| C           | 0.641953  | -1.270204 | -0.697377 | C             | 0.129851  | 1.089564  | 0.022078  |
| C           | -0.699603 | -1.239466 | -0.697342 | C             | 0.552438  | -0.320970 | 0.111642  |
| H           | -1.258534 | 2.124370  | -0.980615 | C             | -0.467832 | -1.361314 | 0.003442  |
| H           | 1.354829  | 2.064370  | -0.980562 | H             | -3.261183 | 0.610180  | -0.103189 |
| H           | 2.322932  | -0.053464 | 0.057959  | H             | -1.563648 | 2.425842  | -0.034820 |
| H           | 1.258534  | -2.124369 | -0.980616 | H             | 0.946863  | 1.811826  | 0.020940  |
| O           | -0.738470 | 0.016873  | 1.338011  | H             | 0.385111  | 0.165231  | 1.204454  |
| O           | 0.738469  | -0.016874 | 1.338011  | O             | 1.853663  | -0.665354 | -0.014240 |
| H           | -1.354829 | -2.064370 | -0.980564 | O             | 2.688963  | 0.453671  | -0.123327 |
| H           | -2.322932 | 0.053464  | 0.057958  | H             | -0.136921 | -2.401321 | -0.023118 |
| 14          |           |           |           | H             | -2.549291 | -1.789722 | -0.116601 |
| <b>I12g</b> |           |           |           | 14            |           |           |           |
| C           | -1.249731 | -0.800796 | 0.210051  | <b>T12P3g</b> |           |           |           |
| C           | 0.119752  | -1.430633 | 0.056814  | C             | 0.000176  | 1.305775  | 0.223867  |
| C           | 1.249731  | -0.706576 | 0.056851  | C             | -1.260598 | 0.663445  | -0.404774 |
| C           | 1.249731  | 0.800796  | 0.210051  | C             | -1.260598 | -0.663838 | -0.404624 |
| C           | -0.119752 | 1.430633  | 0.056814  | C             | -0.000176 | -1.305775 | 0.223867  |
| C           | -1.249731 | 0.706576  | 0.056851  | C             | 1.260598  | -0.663445 | -0.404774 |
| H           | 0.127630  | -2.514826 | -0.084555 | C             | 1.260598  | 0.663838  | -0.404624 |
| H           | 2.231450  | -1.166760 | -0.084504 | H             | -2.045770 | 1.335423  | -0.747824 |
| H           | 1.521567  | 0.975040  | 1.306851  | H             | -2.046495 | -1.335566 | -0.746570 |
| H           | -0.127630 | 2.514826  | -0.084555 | H             | 0.000239  | -0.600710 | 1.287395  |
| O           | -2.273820 | -1.456985 | -0.385011 | H             | 2.045770  | -1.335423 | -0.747824 |
| O           | 2.273820  | 1.456985  | -0.385011 | O             | -0.000565 | 2.571409  | 0.465024  |



|             |           |           |           |               |           |           |           |
|-------------|-----------|-----------|-----------|---------------|-----------|-----------|-----------|
| H           | -2.231450 | 1.166760  | -0.084504 | O             | 0.000565  | -2.571409 | 0.465024  |
| H           | -1.521567 | -0.975040 | 1.306851  | H             | 2.046495  | 1.335566  | -0.746570 |
| 14          |           |           |           | H             | -0.000239 | 0.600710  | 1.287395  |
| <b>I13g</b> |           |           |           | 14            |           |           |           |
| C           | -0.700049 | -1.264954 | 0.252190  | <b>T13P4g</b> |           |           |           |
| C           | 0.659048  | -1.219215 | 0.065312  | C             | -0.706431 | 1.260422  | -0.321814 |
| C           | 1.346159  | 0.018232  | -0.026570 | C             | 0.643146  | 1.254012  | -0.098223 |
| C           | 0.636150  | 1.245075  | 0.061190  | C             | 1.343637  | 0.017788  | 0.046091  |
| C           | -0.720340 | 1.262533  | 0.244155  | C             | 0.665805  | -1.227458 | -0.099297 |
| C           | -1.534095 | -0.008184 | 0.278093  | C             | -0.685331 | -1.261028 | -0.333022 |
| H           | -1.232951 | -2.215781 | 0.307989  | C             | -1.470201 | -0.006167 | -0.244640 |
| H           | 1.226016  | -2.154012 | -0.017286 | H             | -1.252774 | 2.195295  | -0.457176 |
| H           | 1.201637  | 2.176357  | -0.025970 | H             | 1.218598  | 2.181889  | -0.050631 |
| H           | -1.272529 | 2.202666  | 0.296309  | H             | 1.242861  | -2.158906 | -0.058201 |
| O           | -2.570085 | -0.021558 | -0.639825 | H             | -1.212163 | -2.204532 | -0.483500 |
| H           | -2.157119 | -0.007811 | 1.233646  | O             | -2.566101 | -0.022938 | 0.670955  |
| O           | 2.701079  | 0.096697  | -0.207519 | H             | -2.766565 | -0.018234 | -0.513432 |
| H           | 3.065752  | -0.803452 | -0.262149 | O             | 2.687624  | 0.095859  | 0.271542  |
| 14          |           |           |           | H             | 3.054105  | -0.804286 | 0.328387  |
| <b>I1g</b>  |           |           |           | 14            |           |           |           |
| C           | 0.018031  | 0.706670  | 0.910656  | <b>T2-3g</b>  |           |           |           |
| C           | -0.961883 | 1.406514  | 0.190858  | C             | 1.236126  | 1.350762  | -0.055555 |
| C           | -1.926394 | 0.702926  | -0.531362 | C             | 2.155121  | 0.251562  | 0.134497  |
| C           | -1.924975 | -0.705861 | -0.530210 | C             | 1.713519  | -1.020314 | 0.137233  |
| C           | -0.959179 | -1.406337 | 0.193278  | C             | 0.262294  | -1.323993 | -0.017176 |
| C           | 0.019339  | -0.703334 | 0.912025  | C             | -0.633100 | -0.151056 | -0.228792 |
| H           | 0.771354  | -1.247334 | 1.487031  | C             | -0.108433 | 1.168900  | -0.208229 |
| H           | -0.958040 | -2.498451 | 0.195910  | H             | 3.209595  | 0.470338  | 0.255658  |
| H           | -2.685294 | -1.249262 | -1.096411 | H             | 2.396007  | -1.853190 | 0.263488  |
| H           | -2.687808 | 1.243864  | -1.098446 | H             | 0.067715  | -2.063886 | -0.807778 |
| H           | -0.962737 | 2.498634  | 0.191581  | O             | -2.389499 | 0.326584  | 0.669336  |
| H           | 0.769466  | 1.253040  | 1.484205  | O             | -1.879157 | -0.419215 | -0.510108 |
| O           | 1.932575  | -0.001278 | -0.729520 | H             | -0.796003 | 1.989858  | -0.353769 |
| O           | 3.087854  | 0.000783  | -0.274898 | H             | 1.639952  | 2.356487  | -0.097293 |
| 14          |           |           |           | H             | -0.121180 | -1.813723 | 0.893997  |
| <b>I2g</b>  |           |           |           | 14            |           |           |           |
| C           | 1.759341  | -1.041634 | -0.000052 | <b>T3-4g</b>  |           |           |           |
| C           | 2.195766  | 0.333105  | -0.000048 | C             | -1.202436 | -1.131625 | -0.447315 |

|            |           |           |           |              |           |           |           |
|------------|-----------|-----------|-----------|--------------|-----------|-----------|-----------|
| C          | 1.296348  | 1.352602  | -0.000021 | C            | -1.927752 | -0.013094 | -0.098662 |
| C          | -0.171708 | 1.101290  | 0.000005  | C            | -1.254355 | 1.185323  | 0.279835  |
| C          | -0.536658 | -0.335196 | -0.000001 | C            | 0.022072  | 1.473020  | -0.251986 |
| C          | 0.422518  | -1.373581 | -0.000031 | C            | 1.108169  | 0.015590  | -0.017238 |
| H          | 3.267575  | 0.543939  | -0.000072 | C            | 0.219157  | -1.264268 | -0.146057 |
| H          | 1.632345  | 2.392358  | -0.000022 | H            | -3.020750 | -0.052347 | -0.072252 |
| H          | -0.698779 | 1.584715  | -0.853835 | H            | -1.714367 | 1.843468  | 1.028172  |
| O          | -1.806510 | -0.661345 | 0.000049  | H            | 0.085427  | 1.356211  | -1.340617 |
| O          | -2.679129 | 0.401404  | 0.000081  | O            | 0.664005  | -0.654051 | 1.125134  |
| H          | 0.079643  | -2.410003 | -0.000028 | O            | 2.247289  | 0.291544  | -0.421413 |
| H          | 2.509444  | -1.835698 | -0.000066 | H            | 0.729232  | -2.203871 | -0.367722 |
| H          | -0.698758 | 1.584696  | 0.853869  | H            | -1.708428 | -1.990275 | -0.902517 |
| 14         |           |           |           | H            | 0.549415  | 2.357182  | 0.113709  |
| <b>I3g</b> |           |           |           | 14           |           |           |           |
| C          | 1.342126  | 1.282146  | -0.034569 | <b>T4P1g</b> |           |           |           |
| C          | 2.112206  | 0.050165  | 0.089566  | C            | 0.547404  | 1.372222  | 0.011196  |
| C          | 1.504970  | -1.155968 | 0.050236  | C            | 1.615604  | 0.824825  | -0.651759 |
| C          | 0.025386  | -1.284888 | -0.153578 | C            | 1.835170  | -0.560406 | -0.360512 |
| C          | -0.760437 | 0.012350  | -0.041227 | C            | 1.387680  | -1.029176 | 0.851482  |
| C          | -0.010564 | 1.281124  | -0.116591 | C            | -1.402549 | -0.298944 | -0.090892 |
| H          | 3.195913  | 0.120646  | 0.207359  | C            | -0.339265 | 0.473674  | 0.731865  |
| H          | 2.085414  | -2.079303 | 0.124096  | H            | 2.222518  | 1.390703  | -1.362279 |
| H          | -0.162045 | -1.693339 | -1.166835 | H            | 2.211297  | -1.242170 | -1.129425 |
| O          | -1.864247 | 0.020417  | 0.859091  | H            | 1.217506  | -2.092533 | 1.032614  |
| O          | -2.043076 | -0.003789 | -0.638194 | O            | -1.385154 | -1.383099 | -0.634105 |
| H          | -0.603287 | 2.195275  | -0.182669 | O            | -2.192936 | 0.696264  | 0.012760  |
| H          | 1.882268  | 2.232735  | -0.050345 | H            | -0.645993 | 0.693826  | 1.758387  |
| H          | -0.421807 | -2.018609 | 0.538195  | H            | 0.321968  | 2.442836  | -0.015826 |
| 14         |           |           |           | H            | 1.433163  | -0.391157 | 1.739011  |
| <b>I4g</b> |           |           |           | 14           |           |           |           |
| C          | -0.298212 | -1.476456 | 0.100763  | <b>T5-6g</b> |           |           |           |
| C          | -1.495779 | -1.059334 | -0.370252 | C            | 0.975290  | 0.433026  | 0.632829  |
| C          | -2.035185 | 0.299943  | -0.385070 | C            | 0.382322  | -0.972003 | 0.538307  |
| C          | -1.855247 | 1.233748  | 0.565918  | C            | -1.069477 | -1.161772 | 0.340599  |
| C          | 1.397343  | 0.496980  | -0.052155 | C            | -1.799150 | -0.072690 | -0.128191 |
| C          | 0.774590  | -0.628420 | 0.653128  | C            | -1.235780 | 1.232141  | -0.241983 |
| H          | -2.146126 | -1.829893 | -0.801364 | C            | 0.043703  | 1.510690  | 0.191100  |
| H          | -2.677864 | 0.539526  | -1.240435 | H            | 1.486510  | 0.664324  | 1.587777  |

|            |           |           |           |              |           |           |           |
|------------|-----------|-----------|-----------|--------------|-----------|-----------|-----------|
| H          | -2.288537 | 2.230684  | 0.468447  | H            | -1.534185 | -2.136014 | 0.500557  |
| O          | 1.453345  | 1.643680  | -0.393511 | H            | -2.856349 | -0.205397 | -0.376566 |
| O          | 2.109290  | -0.624754 | -0.202533 | H            | -1.859965 | 2.033282  | -0.645945 |
| H          | 1.039970  | -0.773366 | 1.707756  | H            | 0.445782  | 2.525085  | 0.129161  |
| H          | -0.071512 | -2.548849 | 0.085855  | H            | 0.866793  | -1.683755 | 1.229384  |
| H          | -1.282073 | 1.031726  | 1.474099  | O            | 0.593630  | -1.233012 | -0.831905 |
| 14         |           |           |           | O            | 1.865116  | 0.356277  | -0.470637 |
| <b>I5g</b> |           |           |           | 14           |           |           |           |
| C          | -1.621388 | 0.892070  | -0.259356 | <b>T6-7g</b> |           |           |           |
| C          | -0.464494 | 1.481904  | 0.110371  | C            | -0.746503 | -1.017174 | -0.537623 |
| C          | 0.691009  | 0.672201  | 0.617364  | C            | 0.724460  | -0.943290 | -0.770817 |
| C          | 0.528586  | -0.849246 | 0.506047  | C            | 1.382873  | 0.332242  | -0.342675 |
| C          | -0.829821 | -1.394094 | 0.205584  | C            | 0.564514  | 1.514477  | 0.010958  |
| C          | -1.820010 | -0.556997 | -0.172382 | C            | -0.785938 | 1.470437  | 0.039583  |
| H          | -0.341218 | 2.567257  | 0.066336  | C            | -1.529899 | 0.214752  | -0.154506 |
| H          | -2.455132 | 1.502123  | -0.617250 | H            | -1.257698 | -1.789080 | -1.127004 |
| H          | -2.811561 | -0.952473 | -0.409048 | H            | 2.339857  | 0.589823  | -0.815960 |
| O          | 1.800058  | 0.600740  | -0.344735 | H            | 1.084825  | 2.467198  | 0.139752  |
| O          | 1.398522  | -0.823060 | -0.687131 | H            | -1.362993 | 2.384257  | 0.206403  |
| H          | 1.071596  | 1.064506  | 1.576087  | H            | -2.579279 | 0.284284  | -0.463398 |
| H          | 1.036026  | -1.406236 | 1.312407  | H            | 1.754763  | -1.492930 | 0.130509  |
| H          | -0.991637 | -2.471655 | 0.280626  | O            | 1.575223  | -0.627607 | 0.773233  |
| 14         |           |           |           | O            | -1.279787 | -0.856419 | 0.784289  |
| <b>I6g</b> |           |           |           | 14           |           |           |           |
| C          | 0.753261  | -0.982232 | 0.496577  | <b>T6-9g</b> |           |           |           |
| C          | -0.753620 | -0.982112 | 0.496489  | C            | 0.285499  | -1.142553 | 0.484620  |
| C          | -1.471629 | 0.298197  | 0.235150  | C            | -1.050087 | -0.438850 | 0.600710  |
| C          | -0.675123 | 1.519264  | -0.004920 | C            | -1.137627 | 1.047893  | 0.350690  |
| C          | 0.675894  | 1.518948  | -0.005242 | C            | 0.072978  | 1.692084  | -0.108833 |
| C          | 1.471737  | 0.297659  | 0.235311  | C            | 1.312684  | 1.122604  | -0.021802 |
| H          | 1.225257  | -1.722673 | 1.155182  | C            | 1.501519  | -0.316468 | 0.230335  |
| H          | -2.474556 | 0.436848  | 0.655159  | H            | 0.410665  | -2.052390 | 1.086202  |
| H          | -1.220414 | 2.455058  | -0.157312 | H            | -2.260081 | 0.530979  | -0.438176 |
| H          | 1.221577  | 2.454444  | -0.158051 | H            | -0.003463 | 2.744366  | -0.401950 |
| H          | 2.474948  | 0.435641  | 0.654847  | H            | 2.211220  | 1.728683  | -0.183851 |
| H          | -1.226007 | -1.722362 | 1.155016  | H            | 2.474397  | -0.653822 | 0.601854  |
| O          | -1.412887 | -0.771940 | -0.751553 | H            | -1.612879 | -0.812203 | 1.471670  |
| O          | 1.412396  | -0.772472 | -0.751577 | O            | -1.813909 | -0.474989 | -0.631188 |

|            |           |           |           |               |           |           |           |
|------------|-----------|-----------|-----------|---------------|-----------|-----------|-----------|
| 14         |           |           |           | O             | 0.922703  | -1.184244 | -0.787571 |
| <b>I7g</b> |           |           |           | 14            |           |           |           |
| C          | -0.688073 | -1.040554 | -0.553100 | <b>T7-8g</b>  |           |           |           |
| C          | 0.772447  | -0.896766 | -0.837856 | C             | 0.714899  | -0.901058 | 0.653589  |
| C          | 1.334276  | 0.402300  | -0.355568 | C             | -0.769852 | -0.891238 | 0.682222  |
| C          | 0.485855  | 1.546037  | 0.032448  | C             | -1.408286 | 0.444831  | 0.439151  |
| C          | -0.863874 | 1.436873  | 0.051349  | C             | -0.684510 | 1.532986  | -0.110738 |
| C          | -1.538385 | 0.143344  | -0.137698 | C             | 0.700239  | 1.501410  | -0.177290 |
| H          | -1.190059 | -1.826971 | -1.130825 | C             | 1.483399  | 0.318340  | 0.120701  |
| H          | 2.305454  | 0.709522  | -0.766122 | H             | 1.232477  | -1.467235 | 1.439708  |
| H          | 0.962199  | 2.523436  | 0.149820  | H             | -2.437575 | 0.624790  | 0.770760  |
| H          | -1.487343 | 2.322079  | 0.206540  | H             | -1.208742 | 2.479073  | -0.273789 |
| H          | -2.596589 | 0.155850  | -0.422959 | H             | 1.244626  | 2.432819  | -0.358148 |
| O          | 1.533289  | -0.624755 | 0.748757  | H             | 2.521664  | 0.477351  | 0.432447  |
| O          | -1.202305 | -0.914899 | 0.783768  | H             | -2.155015 | -1.356067 | -0.637976 |
| H          | 2.345000  | -1.114079 | 0.505894  | O             | -1.267323 | -0.970288 | -0.757333 |
| 14         |           |           |           | O             | 1.340727  | -0.932506 | -0.620017 |
| <b>I8g</b> |           |           |           | 14            |           |           |           |
| C          | -1.766291 | -0.531809 | 0.251103  | <b>T8P2g</b>  |           |           |           |
| C          | -1.261432 | 0.839168  | 0.363369  | C             | -1.635627 | 0.728385  | -0.250767 |
| C          | 0.236048  | 1.050183  | 0.249787  | C             | -1.244821 | -0.687077 | -0.458452 |
| C          | 1.070866  | -0.146969 | 0.036121  | C             | 0.236755  | -1.018673 | -0.471753 |
| C          | 0.505412  | -1.362394 | -0.211846 | C             | 1.128113  | 0.037427  | -0.083119 |
| C          | -0.920461 | -1.543337 | -0.095397 | C             | 0.690835  | 1.304604  | 0.233856  |
| H          | -2.819187 | -0.721713 | 0.467910  | C             | -0.701383 | 1.646352  | 0.117049  |
| H          | -1.837201 | 1.565294  | 0.948413  | H             | -2.672307 | 1.020871  | -0.431275 |
| H          | 1.151221  | -2.220686 | -0.406094 | H             | -1.877741 | -1.232626 | -1.172514 |
| H          | -1.314764 | -2.554396 | -0.227118 | H             | 1.410617  | 2.058135  | 0.565025  |
| O          | 2.431185  | -0.025540 | 0.160369  | H             | -0.993590 | 2.683048  | 0.302132  |
| H          | 2.672286  | 0.914678  | 0.105347  | O             | 2.468180  | -0.250684 | -0.053009 |
| H          | 0.700447  | 1.894364  | 0.782465  | H             | 2.545089  | -1.200373 | -0.267098 |
| O          | -0.648392 | 1.437217  | -0.814087 | H             | -0.190441 | -2.013414 | 0.387364  |
| 14         |           |           |           | O             | -1.101288 | -1.422034 | 0.814944  |
| <b>I9g</b> |           |           |           | 14            |           |           |           |
| C          | -1.227093 | 1.117048  | -0.029375 | <b>T9-10g</b> |           |           |           |
| C          | -1.169203 | -0.352432 | -0.190020 | C             | -0.549106 | -1.187695 | -0.408426 |
| C          | 0.067237  | -1.121190 | 0.017128  | C             | 0.822793  | -0.668924 | -0.668314 |
| C          | 1.230325  | -0.296381 | -0.013375 | C             | 1.193059  | 0.693857  | -0.462343 |

|   |           |           |           |   |           |           |           |
|---|-----------|-----------|-----------|---|-----------|-----------|-----------|
| C | 1.198760  | 1.088981  | 0.061704  | C | 0.211115  | 1.600107  | 0.077454  |
| C | -0.043500 | 1.797062  | 0.044078  | C | -1.119957 | 1.311018  | -0.064878 |
| H | -2.193545 | 1.606884  | -0.051321 | C | -1.559446 | -0.092954 | -0.181389 |
| H | -0.994064 | -0.448780 | -1.326170 | H | -0.832084 | -2.143754 | -0.873289 |
| H | 2.131331  | 1.638548  | 0.146489  | H | 0.532809  | 2.595955  | 0.398882  |
| H | -0.029553 | 2.879312  | 0.111751  | H | -1.893400 | 2.081579  | -0.008444 |
| O | 2.472861  | -0.916765 | 0.013545  | H | -2.589031 | -0.307237 | -0.485143 |
| H | 2.319733  | -1.885874 | 0.007813  | H | 1.447221  | -1.309170 | -1.309978 |
| H | -2.190666 | -1.936439 | 0.324430  | O | 1.903185  | -0.329249 | 0.635514  |
| O | -2.395661 | -0.989756 | 0.167226  | O | -1.086821 | -0.972261 | 0.893953  |
|   |           |           |           | H | 2.812836  | -0.437757 | 0.289613  |

**Table S8.** Theoretical predictions of detailed energies of reactants and intermediates in the interaction of the C<sub>6</sub>H<sub>6</sub> with MnO<sub>x</sub> cluster by the method PBE-D3/6-311++g(d,p) (H, C, O)/LandL2DZ (Mn) with the BSSE correction. ZPE energies are reported unscaled.

| Species                        | Single point energy (a.u) | ZPE (a.u) | BSSE energy (a.u) |
|--------------------------------|---------------------------|-----------|-------------------|
| C <sub>6</sub> H <sub>6</sub>  | -231.9948881              | 0.097538  |                   |
| MnO <sub>2</sub>               | -254.218000               | 0.005073  |                   |
| Mn <sub>2</sub> O <sub>3</sub> | -433.349563               | 0.009255  |                   |
| A1                             | -486.278115               | 0.104028  | 0.007956          |
| A2                             | -486.243715               | 0.105238  | 0.009620          |
| A3                             | -486.251774               | 0.104614  | 0.010966          |
| A4                             | -486.237324               | 0.103756  | 0.008163          |
| A5                             | -486.211873               | 0.102370  | 0.004337          |
| B1                             | -665.42729533             | 0.107918  | 0.01254983        |
| B2                             | -665.39773292             | 0.107916  | 0.00800227        |
| B3                             | -665.37285880             | 0.107510  | 0.00951934        |

**Table S9.** Cartesian coordinates (Å) for the reactants, intermediates, transition states, and products in the interaction of the C<sub>6</sub>H<sub>6</sub> with MnO<sub>x</sub> by the method PBE/6-311++g(d,p) (H, C, O)/ LandL2DZ (Mn).

|                                    |           |            |           |   |           |           |           |
|------------------------------------|-----------|------------|-----------|---|-----------|-----------|-----------|
| 5                                  |           | 19         |           |   |           |           |           |
| <b>Mn<sub>2</sub>O<sub>3</sub></b> |           | <b>I18</b> |           |   |           |           |           |
| O                                  | -2.166650 | 0.705772   | -0.615093 | C | 0.189229  | 1.636393  | 0.737236  |
| O                                  | 2.204739  | 0.581863   | 0.688760  | C | -0.647944 | 2.206160  | -0.330447 |
| O                                  | -0.001173 | -1.260102  | -0.091572 | C | -1.883454 | 1.725617  | -0.607350 |
| Mn                                 | -1.172886 | -0.037950  | 0.393786  | C | -2.461686 | 0.528661  | 0.104722  |
| Mn                                 | 1.161074  | 0.029140   | -0.388056 | C | -1.738892 | 0.235072  | 1.399365  |
| 3                                  |           |            |           | C | -0.495868 | 0.731895  | 1.666443  |
| <b>MnO<sub>2</sub></b>             |           |            |           | O | -2.315682 | -0.669578 | -0.730899 |
| Mn                                 | 0.000000  | 0.000000   | 0.274393  | O | 2.856907  | 1.093889  | -0.569424 |

|           |           |           |           |            |           |           |           |
|-----------|-----------|-----------|-----------|------------|-----------|-----------|-----------|
| O         | 0.000000  | 1.435438  | -0.428739 | O          | 0.517389  | -0.366630 | -1.337228 |
| O         | 0.000000  | -1.435438 | -0.428739 | H          | -2.478247 | 2.159491  | -1.414338 |
| 15        |           |           |           | H          | 0.022650  | 0.440737  | 2.583408  |
| <b>A1</b> |           |           |           | H          | 0.918511  | 2.316729  | 1.200809  |
| C         | 1.045649  | 2.149277  | 0.713161  | H          | -0.238272 | 3.036065  | -0.912016 |
| C         | 1.045649  | 0.964953  | 1.415872  | Mn         | -0.650439 | -1.336381 | -0.405148 |
| C         | 1.018955  | -0.294685 | 0.726653  | Mn         | 1.552879  | 0.334815  | -0.116876 |
| C         | 1.018955  | -0.294685 | -0.726653 | O          | 1.646644  | -1.124484 | 0.942772  |
| C         | 1.045649  | 0.964953  | -1.415872 | O          | 0.698520  | -2.123104 | 0.618423  |
| C         | 1.045649  | 2.149277  | -0.713161 | H          | -3.547387 | 0.645820  | 0.266383  |
| H         | 1.077095  | 3.100052  | 1.249623  | H          | -2.236777 | -0.423228 | 2.117381  |
| H         | 1.100737  | 0.967426  | 2.506544  | 19         |           |           |           |
| H         | 1.315744  | -1.198310 | 1.268389  | <b>I19</b> |           |           |           |
| H         | 1.100737  | 0.967426  | -2.506544 | C          | 1.272001  | 1.342322  | 0.545331  |
| H         | 1.077095  | 3.100052  | -1.249623 | C          | 0.840359  | 2.013608  | -0.685588 |
| O         | -0.938876 | -2.453924 | 0.000000  | C          | -0.463107 | 2.292946  | -0.916105 |
| O         | -1.962607 | 0.240340  | 0.000000  | C          | -1.538905 | 1.840639  | 0.024541  |
| Mn        | -0.843933 | -0.874568 | 0.000000  | C          | -1.032248 | 1.497893  | 1.395506  |
| H         | 1.315744  | -1.198310 | -1.268389 | C          | 0.275237  | 1.229457  | 1.617536  |
| 15        |           |           |           | O          | -2.138981 | 0.632978  | -0.585317 |
| <b>A2</b> |           |           |           | O          | 2.693392  | -0.322090 | -1.205615 |
| C         | 0.000000  | 1.462600  | -0.801232 | O          | 0.095526  | -1.193440 | -0.670418 |
| C         | 1.253063  | 0.674121  | -1.138205 | H          | -0.776521 | 2.789932  | -1.837052 |
| C         | 1.253063  | -0.674121 | -1.138205 | H          | 0.620323  | 0.911646  | 2.604248  |
| C         | 0.000000  | -1.462600 | -0.801232 | H          | 2.296819  | 1.561877  | 0.873442  |
| C         | -1.253063 | -0.674121 | -1.138205 | H          | 1.607664  | 2.284265  | -1.414826 |
| C         | -1.253063 | 0.674121  | -1.138205 | Mn         | -1.589654 | -0.998947 | -0.335179 |
| H         | 0.000000  | -2.439816 | -1.313435 | Mn         | 1.634743  | -0.595746 | -0.065393 |
| H         | 2.181153  | -1.239954 | -1.262499 | O          | 2.094333  | -1.248838 | 1.295734  |
| H         | 2.181153  | 1.239954  | -1.262499 | O          | -2.350949 | -1.987808 | 0.619808  |
| H         | 0.000000  | 2.439816  | -1.313435 | H          | -2.373648 | 2.559833  | 0.069353  |
| H         | -2.181153 | 1.239954  | -1.262499 | H          | -1.768448 | 1.412142  | 2.198293  |
| H         | -2.181153 | -1.239954 | -1.262499 | 19         |           |           |           |
| Mn        | 0.000000  | 0.000000  | 1.378018  | <b>I20</b> |           |           |           |
| O         | 0.000000  | -1.735551 | 0.634882  | C          | 0.715900  | 1.168818  | 0.497758  |
| O         | 0.000000  | 1.735551  | 0.634882  | C          | 0.352041  | 2.031752  | -0.598214 |
| 15        |           |           |           | C          | -0.969263 | 2.284243  | -0.794480 |
| <b>A3</b> |           |           |           | C          | -1.991202 | 1.579022  | 0.055145  |

|           |           |           |           |            |           |           |           |
|-----------|-----------|-----------|-----------|------------|-----------|-----------|-----------|
| C         | -0.921353 | 0.131386  | -1.409942 | C          | -1.482965 | 1.274826  | 1.442259  |
| C         | -1.097241 | -1.155625 | -0.807533 | C          | -0.155223 | 1.060065  | 1.648771  |
| C         | -1.112505 | -1.284797 | 0.585863  | O          | -2.270600 | 0.314354  | -0.640794 |
| C         | -0.921000 | -0.131859 | 1.410004  | O          | 2.887586  | 0.454324  | -1.068158 |
| C         | -1.097884 | 1.155023  | 0.807631  | O          | 0.473809  | -1.264018 | -0.706772 |
| C         | -1.113407 | 1.284201  | -0.585729 | H          | -1.318610 | 2.849251  | -1.662393 |
| H         | -0.852013 | 0.228743  | -2.492274 | H          | 0.238046  | 0.678283  | 2.593784  |
| H         | -1.035057 | -2.049461 | -1.428707 | H          | 1.124550  | 2.349127  | -1.303323 |
| H         | -1.053347 | -2.278024 | 1.031643  | Mn         | -1.266990 | -1.148753 | -0.405120 |
| H         | -1.036120 | 2.048894  | 1.428795  | Mn         | 1.721027  | -0.263500 | 0.051867  |
| H         | -1.054969 | 2.277486  | -1.031477 | O          | 2.277908  | -0.881963 | 1.389554  |
| O         | 1.618346  | -1.332501 | -0.002183 | O          | -1.928521 | -2.368213 | 0.390129  |
| O         | 1.617448  | 1.333469  | 0.002056  | H          | -2.950698 | 2.118441  | 0.085169  |
| Mn        | 0.703078  | 0.000152  | -0.000042 | H          | -2.215585 | 1.091749  | 2.232495  |
| H         | -0.851458 | -0.229151 | 2.492329  | H          | 3.434197  | -0.208760 | -1.533519 |
| 15        |           |           |           | 19         |           |           |           |
| <b>A4</b> |           |           |           | <b>I21</b> |           |           |           |
| C         | -0.566254 | 1.156081  | 0.551548  | C          | 2.051880  | 0.021185  | -0.031186 |
| C         | -1.716953 | 1.186624  | -0.398505 | C          | 1.763483  | 1.015474  | -1.064034 |
| C         | -2.402951 | 0.067163  | -0.732707 | C          | 0.904127  | 2.044666  | -0.843768 |
| C         | -2.081795 | -1.231460 | -0.170600 | C          | 0.108563  | 2.148419  | 0.415907  |
| C         | -1.059762 | -1.370016 | 0.719524  | C          | 0.662435  | 1.326070  | 1.528895  |
| C         | -0.236363 | -0.234856 | 1.106679  | C          | 1.569879  | 0.318672  | 1.308491  |
| H         | -0.663141 | 1.911390  | 1.351014  | O          | -1.271514 | 1.676299  | 0.075903  |
| H         | -1.975882 | 2.159255  | -0.823723 | O          | -0.928463 | -0.830355 | -1.404423 |
| H         | -0.828659 | -2.345347 | 1.154365  | H          | 0.685066  | 2.761385  | -1.638087 |
| H         | 0.156323  | -0.250338 | 2.136092  | H          | 1.943443  | -0.297706 | 2.129061  |
| O         | 1.891955  | -1.112076 | -1.044572 | H          | 2.259167  | 0.906435  | -2.034213 |
| O         | 0.700930  | 1.556128  | -0.167631 | Mn         | -1.832272 | 0.052680  | -0.211052 |
| Mn        | 1.474483  | -0.020228 | 0.053158  | Mn         | 0.297118  | -1.058805 | -0.124796 |
| H         | -2.675442 | -2.099227 | -0.464721 | O          | 0.352467  | -2.400347 | 0.716197  |
| H         | -3.233881 | 0.136338  | -1.439981 | O          | -2.933405 | -0.619378 | 0.682912  |
| 15        |           |           |           | H          | -0.058832 | 3.193216  | 0.723168  |
| <b>A5</b> |           |           |           | H          | 0.262543  | 1.490068  | 2.531457  |
| C         | -0.666755 | -0.501334 | 0.823748  | O          | 3.219175  | -0.728056 | -0.092866 |
| C         | -0.803022 | 0.981841  | 0.634043  | H          | 3.419185  | -0.932496 | -1.022777 |
| C         | -1.869569 | 1.533239  | -0.029473 | 19         |           |           |           |
| C         | -2.911532 | 0.719303  | -0.549910 | <b>I22</b> |           |           |           |

|           |           |           |           |            |           |           |           |
|-----------|-----------|-----------|-----------|------------|-----------|-----------|-----------|
| C         | -2.861784 | -0.687716 | -0.385793 | C          | 2.548923  | 0.303089  | -0.262986 |
| C         | -1.817973 | -1.288772 | 0.274939  | C          | 2.088008  | 1.657359  | -0.639557 |
| H         | -0.551844 | -0.722243 | 1.908390  | C          | 1.047241  | 2.259859  | -0.032075 |
| H         | 0.004354  | 1.602012  | 1.034497  | C          | 0.191201  | 1.618352  | 1.028848  |
| H         | -1.921445 | 2.617396  | -0.161317 | C          | 0.558261  | 0.176135  | 1.331674  |
| H         | -3.670822 | -1.302067 | -0.790309 | C          | 1.721816  | -0.425709 | 0.744412  |
| H         | -1.767610 | -2.373769 | 0.389937  | O          | -1.186854 | 1.743612  | 0.596209  |
| O         | 2.744422  | 1.052878  | 0.295970  | O          | 3.578944  | -0.190918 | -0.724233 |
| O         | 0.543638  | -1.005652 | 0.198181  | O          | -0.762063 | -0.469118 | -1.411868 |
| Mn        | 2.037427  | -0.236663 | -0.394429 | H          | 0.741994  | 3.271920  | -0.315762 |
| H         | -3.748975 | 1.178077  | -1.079010 | H          | 0.265547  | 2.213834  | 1.961062  |
| 17        |           |           |           | H          | 2.261097  | -1.223563 | 1.264309  |
| <b>B1</b> |           |           |           | H          | 2.671665  | 2.162645  | -1.413305 |
| C         | 1.399288  | 0.280115  | 1.445816  | H          | 0.201787  | -0.198374 | 2.299570  |
| C         | 2.092640  | -0.748077 | 0.686465  | Mn         | -1.855766 | 0.372879  | -0.317686 |
| C         | 2.092640  | -0.748077 | -0.686465 | Mn         | 0.036326  | -1.206207 | -0.051982 |
| C         | 1.399288  | 0.280115  | -1.445816 | H          | 1.149176  | -3.272300 | 0.795007  |
| C         | 0.649578  | 1.291929  | -0.732762 | O          | -3.301597 | -0.196003 | 0.001537  |
| C         | 0.649578  | 1.291929  | 0.732762  | O          | 0.329322  | -2.844506 | 0.491970  |
| O         | -1.256880 | 0.322709  | -2.763531 | 19         |           |           |           |
| O         | -1.256880 | 0.322709  | 2.763531  | <b>I23</b> |           |           |           |
| O         | -1.333493 | -0.887395 | 0.000000  | C          | -2.733927 | 0.223775  | 0.389189  |
| H         | 1.691752  | 0.456414  | -2.484537 | C          | -1.552467 | -0.309263 | 1.158486  |
| H         | 2.645582  | -1.515882 | -1.231769 | C          | -0.310550 | 0.384084  | 1.056928  |
| H         | 2.645582  | -1.515882 | 1.231769  | C          | -0.118560 | 1.647240  | 0.248068  |
| H         | 1.691752  | 0.456414  | 2.484537  | C          | -1.280627 | 1.962418  | -0.651735 |
| H         | 0.380150  | 2.218606  | 1.244966  | C          | -2.465698 | 1.326934  | -0.567886 |
| H         | 0.380150  | 2.218606  | -1.244966 | O          | 1.097595  | 1.542752  | -0.518973 |
| Mn        | -0.567100 | -0.205401 | -1.434004 | O          | 1.458181  | -1.463687 | -0.082845 |
| Mn        | -0.567100 | -0.205401 | 1.434004  | H          | 0.417869  | 0.237984  | 1.868644  |
| 17        |           |           |           | H          | -3.311775 | 1.613994  | -1.196889 |
| <b>B2</b> |           |           |           | H          | -1.814149 | -0.898579 | 2.039470  |
| C         | -1.727487 | -1.645359 | 0.421579  | Mn         | 2.181317  | 0.170880  | -0.111683 |
| C         | -0.880098 | -1.026279 | -0.552413 | Mn         | -0.280446 | -1.292277 | -0.140175 |
| C         | -1.360975 | 0.152148  | -1.235824 | O          | -0.931252 | -1.193056 | -1.547725 |
| C         | -2.668249 | 0.656677  | -0.930018 | O          | 3.492913  | 0.422470  | 0.762791  |
| C         | -3.447556 | 0.035898  | 0.023522  | H          | 0.011387  | 2.498456  | 0.951574  |
| C         | -2.972520 | -1.121763 | 0.704380  | H          | -1.120653 | 2.772883  | -1.368560 |



|           |           |           |           |            |           |           |           |
|-----------|-----------|-----------|-----------|------------|-----------|-----------|-----------|
| H         | -1.385638 | -2.559900 | 0.910671  | O          | -3.866041 | -0.200834 | 0.594206  |
| H         | -3.045995 | 1.519755  | -1.482106 | H          | -0.944652 | -2.462085 | 0.544271  |
| H         | -4.446046 | 0.418748  | 0.245111  | 19         |           |           |           |
| H         | -3.614890 | -1.613161 | 1.438545  | <b>I24</b> |           |           |           |
| H         | -0.872817 | 0.478900  | -2.161901 | C          | 2.421277  | -0.694824 | -0.446149 |
| H         | -0.031250 | -1.593419 | -0.945154 | C          | 1.957221  | 0.222933  | 0.617840  |
| Mn        | 0.109514  | 0.751550  | 0.119521  | C          | 0.764479  | -0.073521 | 1.389939  |
| Mn        | 2.362970  | -0.189913 | 0.219134  | C          | 0.102657  | -1.421678 | 1.266414  |
| O         | 1.589883  | 1.182465  | -0.649638 | C          | 0.511823  | -2.214334 | 0.058054  |
| O         | -0.429130 | 1.330731  | 1.469042  | C          | 1.546828  | -1.867692 | -0.732325 |
| O         | 2.579977  | -1.638168 | -0.451764 | O          | -1.373187 | -1.155456 | 1.204529  |
| 17        |           |           |           | O          | -0.611825 | 0.960591  | -1.330101 |
| <b>B3</b> |           |           |           | H          | 0.666290  | 0.389454  | 2.377321  |
| C         | -1.929328 | -1.118566 | 0.655258  | H          | 1.835333  | -2.477551 | -1.592150 |
| C         | -1.220256 | 0.158791  | 1.111540  | H          | 2.718947  | 0.902352  | 1.012223  |
| C         | -1.691553 | 1.440658  | 0.623589  | Mn         | -1.818940 | -0.014167 | -0.378240 |
| C         | -2.787751 | 1.526879  | -0.195122 | Mn         | 0.400698  | 1.350077  | 0.006509  |
| C         | -3.565304 | 0.350351  | -0.526977 | O          | 0.334386  | 2.765014  | 0.693630  |
| C         | -3.208151 | -0.883153 | -0.092320 | O          | -3.314880 | -0.629135 | -0.605402 |
| O         | 3.680612  | -0.771326 | -0.097025 | H          | 0.234756  | -2.016912 | 2.190081  |
| O         | -0.951243 | -1.696638 | -0.299078 | H          | -0.058525 | -3.128765 | -0.144627 |
| O         | 1.390103  | 0.969379  | -0.857444 | O          | 3.482833  | -0.540436 | -1.052519 |
| H         | -3.807281 | -1.764238 | -0.334882 | H          | -1.905072 | -1.976250 | 1.246693  |
| H         | -0.703308 | 0.131426  | 2.078666  | 17         |           |           |           |
| H         | -4.470365 | 0.476726  | -1.126858 | <b>I25</b> |           |           |           |
| H         | -3.111844 | 2.500579  | -0.568903 | C          | 2.115595  | -1.376973 | -0.270666 |
| H         | -1.156997 | 2.345323  | 0.924678  | C          | 1.890559  | -0.131273 | 0.532668  |
| Mn        | 0.175021  | -0.279335 | -0.302461 | C          | 0.666647  | 0.065637  | 1.260724  |
| Mn        | 2.575304  | 0.331225  | 0.227517  | C          | -0.460274 | -0.850194 | 0.961355  |
| H         | -2.050046 | -1.848129 | 1.473454  | C          | -0.177499 | -2.129105 | 0.315887  |
| 17        |           |           |           | C          | 1.022165  | -2.369147 | -0.275844 |
| <b>I1</b> |           |           |           | O          | -1.651674 | -0.598457 | 1.536472  |
| C         | 1.446100  | 1.399209  | 0.280124  | O          | -0.869666 | 1.327485  | -0.892139 |
| C         | 0.686806  | 2.092662  | -0.748034 | H          | 0.618176  | 0.610812  | 2.209795  |
| C         | -0.686124 | 2.092618  | -0.748121 | H          | 1.221719  | -3.302483 | -0.806502 |
| C         | -1.445533 | 1.399368  | 0.280105  | H          | 2.812505  | 0.345280  | 0.880283  |
| C         | -0.732541 | 0.649649  | 1.291953  | Mn         | -1.891625 | 0.093299  | -0.142360 |
| C         | 0.732982  | 0.649508  | 1.291905  | Mn         | 0.761208  | 1.398049  | -0.241821 |

|           |           |           |           |               |           |           |           |
|-----------|-----------|-----------|-----------|---------------|-----------|-----------|-----------|
| O         | -2.763938 | -1.256358 | 0.322632  | O             | 1.367049  | 2.747252  | 0.308884  |
| O         | 2.763124  | -1.257402 | 0.322787  | O             | -2.748267 | -0.812495 | -1.118748 |
| O         | -0.000164 | -1.333493 | -0.887395 | H             | -1.001939 | -2.845820 | 0.268882  |
| H         | -2.484232 | 1.691949  | 0.456340  | O             | 3.185909  | -1.581930 | -0.846053 |
| H         | -1.231398 | 2.645483  | -1.516002 | 19            |           |           |           |
| H         | 1.232141  | 2.645680  | -1.515763 | <b>T18-19</b> |           |           |           |
| H         | 2.484842  | 1.691555  | 0.456487  | C             | 0.255610  | 1.692784  | 0.548071  |
| H         | 1.245199  | 0.379926  | 2.218519  | C             | -0.823249 | 2.114693  | -0.363606 |
| H         | -1.244733 | 0.380374  | 2.218693  | C             | -2.044971 | 1.530732  | -0.349441 |
| Mn        | -1.434087 | -0.567040 | -0.205323 | C             | -2.371242 | 0.360320  | 0.546236  |
| Mn        | 1.433922  | -0.567161 | -0.205479 | C             | -1.388659 | 0.231314  | 1.685016  |
| 17        |           |           |           | C             | -0.160334 | 0.815463  | 1.652886  |
| <b>I2</b> |           |           |           | O             | -2.280171 | -0.893764 | -0.218481 |
| C         | 0.727483  | 1.723583  | 0.019021  | O             | 2.617042  | 1.411048  | -1.241374 |
| C         | -0.366528 | 2.018863  | -0.914506 | O             | 0.425929  | -0.396725 | -1.504674 |
| C         | -1.648031 | 1.630168  | -0.701185 | H             | -2.821845 | 1.858920  | -1.043971 |
| C         | -2.067058 | 0.737546  | 0.436790  | H             | 0.558689  | 0.620066  | 2.452093  |
| C         | -0.877285 | 0.274702  | 1.275137  | H             | 0.982810  | 2.470302  | 0.823521  |
| C         | 0.434903  | 0.912490  | 1.173691  | H             | -0.608019 | 2.920747  | -1.069921 |
| O         | -2.572066 | -0.539581 | -0.103306 | Mn            | -0.524786 | -1.340463 | -0.362263 |
| O         | 3.078926  | -0.139137 | 0.329398  | Mn            | 1.556798  | 0.495492  | -0.522920 |
| O         | 0.707256  | -1.382756 | -0.916744 | O             | 1.984023  | -0.803748 | 0.494064  |
| H         | -2.435716 | 1.913138  | -1.404092 | O             | 0.883708  | -2.067859 | 0.398871  |
| H         | -2.874775 | 1.191273  | 1.041935  | H             | -3.411467 | 0.411900  | 0.909979  |
| H         | 1.049758  | 0.979724  | 2.076204  | H             | -1.672380 | -0.413824 | 2.521060  |
| H         | 1.558755  | 2.433274  | 0.062965  | 19            |           |           |           |
| H         | -0.126989 | 2.617770  | -1.797688 | <b>T19-20</b> |           |           |           |
| H         | -1.147273 | -0.153378 | 2.249386  | C             | 0.857727  | 1.307781  | 0.373856  |
| Mn        | -0.902534 | -1.323526 | -0.026802 | C             | 0.295820  | 2.018150  | -0.753600 |
| Mn        | 1.584230  | -0.127438 | -0.150685 | C             | -1.044178 | 2.250692  | -0.800099 |
| 17        |           |           |           | C             | -1.951790 | 1.590946  | 0.196633  |
| <b>I3</b> |           |           |           | C             | -1.281792 | 1.315059  | 1.514945  |
| C         | -0.466071 | 0.953851  | 0.568767  | C             | 0.069914  | 1.137161  | 1.570159  |
| C         | 0.702697  | 0.312376  | 1.159642  | O             | -2.336280 | 0.309643  | -0.435350 |
| C         | 1.985482  | 0.733509  | 0.627395  | O             | 2.884783  | 0.635987  | -0.728786 |
| C         | 2.081168  | 1.920793  | -0.171838 | O             | 0.393390  | -1.166064 | -0.969225 |
| C         | 0.950625  | 2.626633  | -0.525048 | H             | -1.499802 | 2.751526  | -1.657672 |
| C         | -0.337384 | 2.086177  | -0.213612 | H             | 0.559188  | 0.773570  | 2.477978  |

|           |           |           |           |               |           |           |           |
|-----------|-----------|-----------|-----------|---------------|-----------|-----------|-----------|
| O         | 2.048170  | -2.182696 | 0.318370  | H             | 2.214766  | 1.380489  | 0.081595  |
| O         | -3.531859 | 0.088765  | 0.285411  | H             | 0.954546  | 2.312093  | -1.573942 |
| O         | -0.423084 | -1.195813 | -0.948603 | Mn            | -1.284373 | -1.124111 | -0.369273 |
| H         | 3.070773  | 2.270366  | -0.475456 | Mn            | 1.720284  | -0.417656 | -0.097169 |
| H         | 2.899144  | 0.341886  | 1.084507  | O             | 2.103711  | -1.108137 | 1.281656  |
| H         | 0.615684  | -0.226986 | 2.109087  | O             | -1.793973 | -2.379383 | 0.477186  |
| H         | -1.223595 | 2.543560  | -0.665594 | H             | -2.901783 | 2.132357  | 0.327924  |
| H         | 1.025214  | 3.546866  | -1.108558 | H             | -1.911958 | 1.139068  | 2.389962  |
| Mn        | -1.815796 | -0.350253 | -0.049873 | 19            |           |           |           |
| Mn        | 1.149094  | -1.033046 | -0.263001 | <b>T20-21</b> |           |           |           |
| H         | -3.964600 | 0.624723  | 0.964598  | C             | 0.810750  | 1.113584  | 0.177421  |
| 17        |           |           |           | C             | 0.321183  | 1.836930  | -0.983126 |
| <b>I4</b> |           |           |           | C             | -0.986600 | 2.179622  | -0.973952 |
| C         | -0.383183 | 2.138743  | -0.753320 | C             | -1.842555 | 1.694775  | 0.164688  |
| C         | -1.600699 | 1.556035  | -0.975427 | C             | -1.082694 | 1.672536  | 1.471034  |
| C         | -2.079725 | 0.420130  | -0.190514 | C             | 0.246161  | 1.397784  | 1.481243  |
| C         | -1.282655 | 0.012142  | 0.947422  | O             | -2.254098 | 0.345489  | -0.207504 |
| C         | 0.031618  | 0.605306  | 1.181298  | O             | 2.708191  | 1.020456  | -0.412718 |
| C         | 0.503500  | 1.672141  | 0.305333  | O             | 0.334942  | -1.371111 | -1.126319 |
| O         | -1.821448 | -0.685840 | 2.024700  | H             | -1.468504 | 2.626500  | -1.846218 |
| O         | 2.867696  | -0.155055 | 0.839385  | H             | 0.804476  | 1.176818  | 2.392365  |
| O         | 0.953281  | -1.059432 | -1.270824 | H             | 0.978294  | 1.975808  | -1.842186 |
| H         | -3.155833 | 0.212915  | -0.185274 | Mn            | -1.232883 | -1.138093 | -0.305087 |
| H         | -2.250892 | 1.939551  | -1.765291 | Mn            | 1.529501  | -0.543419 | -0.143979 |
| H         | -0.068171 | 2.990375  | -1.359307 | O             | 1.920062  | -1.201142 | 1.228410  |
| H         | 1.242807  | 2.377650  | 0.697867  | O             | -1.641281 | -2.303038 | 0.708103  |
| H         | 0.415055  | 0.519247  | 2.202174  | H             | -2.774835 | 2.273459  | 0.259888  |
| Mn        | -0.785516 | -1.180127 | -0.655711 | H             | -1.652152 | 1.707082  | 2.403055  |
| Mn        | 1.564301  | -0.039840 | -0.036918 | H             | 3.357267  | 0.981527  | 0.316135  |
| H         | -2.781975 | -0.764923 | 1.890724  | 19            |           |           |           |
| 17        |           |           |           | <b>T21-22</b> |           |           |           |
| <b>I5</b> |           |           |           | C             | 1.726939  | 0.408660  | 0.131130  |
| C         | 1.699795  | 1.277722  | 0.281319  | C             | 1.655876  | 1.318468  | -1.006785 |
| C         | 0.981425  | 2.173224  | -0.606369 | C             | 0.720924  | 2.298754  | -0.991016 |
| C         | -0.395297 | 2.189747  | -0.660233 | C             | -0.274344 | 2.348795  | 0.135040  |
| C         | -1.102893 | 1.303040  | 0.207720  | C             | 0.292366  | 1.856858  | 1.435371  |
| C         | -0.489461 | 0.619526  | 1.322040  | C             | 1.213372  | 0.864463  | 1.422064  |
| C         | 0.973450  | 0.516428  | 1.288168  | O             | -1.394723 | 1.482147  | -0.277046 |

|           |           |           |           |               |           |           |           |
|-----------|-----------|-----------|-----------|---------------|-----------|-----------|-----------|
| O         | -3.280067 | -0.831411 | 0.164486  | O             | -0.922120 | -1.304471 | -1.224133 |
| O         | 2.585499  | -1.665260 | 0.244656  | H             | 0.593285  | 2.980314  | -1.833960 |
| O         | -0.144578 | -1.055169 | -0.949925 | H             | 1.555787  | 0.359539  | 2.327605  |
| H         | -0.920247 | 2.797611  | -1.400458 | H             | 2.337589  | 1.153028  | -1.844338 |
| H         | 1.559610  | 2.819575  | -1.271652 | Mn            | -1.749316 | -0.222372 | -0.160480 |
| H         | 2.772499  | 1.440739  | 0.421753  | Mn            | 0.641405  | -1.218763 | -0.357349 |
| H         | 1.498048  | 0.185245  | 2.188671  | O             | 1.053670  | -2.142861 | 0.993009  |
| H         | -0.993030 | 0.515141  | 2.289891  | O             | -2.623166 | -0.780623 | 1.013371  |
| Mn        | -1.565135 | -0.415792 | -0.082279 | H             | -0.723819 | 3.348338  | 0.238207  |
| Mn        | 1.438432  | -0.686757 | -0.272414 | H             | -0.141013 | 2.219025  | 2.369038  |
| H         | -4.038245 | -0.258009 | -0.030480 | O             | 2.613628  | -0.651588 | 0.015881  |
| 17        |           |           |           | H             | 2.246824  | -1.428685 | 0.765683  |
| <b>I6</b> |           |           |           | 19            |           |           |           |
| C         | 0.513233  | 1.717815  | 0.336934  | <b>T22-23</b> |           |           |           |
| C         | -0.432271 | 2.029795  | -0.700938 | C             | 2.387057  | -0.971091 | -0.349129 |
| C         | -1.629895 | 1.342106  | -0.801412 | C             | 1.861279  | -0.330791 | 0.908171  |
| C         | -1.992144 | 0.333819  | 0.140808  | C             | 0.665657  | -0.741398 | 1.462372  |
| C         | -1.136114 | -0.013234 | 1.239160  | C             | -0.220970 | -1.760563 | 0.795375  |
| C         | 0.195831  | 0.642436  | 1.261911  | C             | 0.224022  | -2.140399 | -0.591333 |
| O         | -3.281959 | -0.172305 | 0.185524  | C             | 1.416219  | -1.782462 | -1.113056 |
| O         | 3.031387  | 0.009735  | 0.486737  | O             | -1.594589 | -1.358541 | 0.817252  |
| O         | 0.807633  | -0.905384 | -1.328229 | O             | -1.073687 | 1.326353  | 0.219630  |
| H         | -2.325726 | 1.573789  | -1.614583 | H             | 0.356133  | -0.401913 | 2.455771  |
| H         | 0.726147  | 0.603143  | 2.217128  | H             | 1.733429  | -2.108153 | -2.106724 |
| H         | -0.200041 | 2.819754  | -1.417275 | H             | 2.589751  | 0.246763  | 1.490897  |
| H         | -1.585825 | -0.367561 | 2.172321  | Mn            | -2.186091 | 0.075393  | -0.046093 |
| Mn        | -0.457758 | -1.447900 | -0.051509 | Mn            | 0.714471  | 1.404736  | 0.145245  |
| Mn        | 1.591754  | 0.043730  | -0.150109 | O             | 1.485624  | 2.644591  | -0.619608 |
| H         | 1.264373  | 2.467440  | 0.603871  | O             | -3.196199 | 0.018213  | -1.246379 |
| H         | -3.797179 | 0.234882  | -0.532028 | H             | -0.175394 | -2.676814 | 1.428258  |
| 17        |           |           |           | H             | -0.480417 | -2.759824 | -1.154628 |
| <b>I7</b> |           |           |           | O             | 3.560361  | -0.835883 | -0.683438 |
| C         | 2.327790  | -0.237445 | 0.503870  | H             | 1.315328  | 2.699062  | 0.833563  |
| C         | 2.389970  | 0.823439  | -0.502104 | 19            |           |           |           |
| C         | 1.441017  | 1.789418  | -0.626441 | <b>T23-24</b> |           |           |           |
| C         | 0.202370  | 1.833997  | 0.221941  | C             | 2.171743  | -0.951372 | -0.558875 |
| C         | 0.063737  | 0.645294  | 1.170324  | C             | 2.026975  | 0.196593  | 0.377929  |
| C         | 1.202916  | -0.259191 | 1.396302  | C             | 1.066195  | 0.150283  | 1.446053  |

|             |           |           |           |               |           |           |           |
|-------------|-----------|-----------|-----------|---------------|-----------|-----------|-----------|
| O           | -0.972397 | 1.660220  | -0.636704 | C             | 0.123995  | -1.031085 | 1.628363  |
| O           | -0.827692 | -1.214296 | -1.138648 | C             | 0.268309  | -2.098727 | 0.578108  |
| H           | 1.537908  | 2.567449  | -1.387394 | C             | 1.173900  | -2.046069 | -0.421829 |
| H           | 0.092796  | 2.807408  | 0.737658  | O             | -1.241975 | -0.462285 | 1.566963  |
| H           | 1.251833  | -0.809575 | 2.341544  | O             | -0.631025 | 0.705836  | -1.340325 |
| H           | 3.250626  | -0.749633 | 0.785603  | H             | 1.236958  | 0.756924  | 2.341659  |
| H           | 3.252248  | 0.833026  | -1.175600 | H             | 1.238992  | -2.839402 | -1.170890 |
| H           | -0.563884 | 0.830176  | 2.048132  | H             | 2.899438  | 0.854117  | 0.442621  |
| Mn          | -1.479101 | 0.025554  | -0.144022 | Mn            | -1.811136 | -0.098857 | -0.266916 |
| Mn          | 0.737900  | -1.423607 | -0.203139 | Mn            | 0.408899  | 1.308781  | -0.097791 |
| O           | -2.707200 | -0.208500 | 0.818566  | O             | 0.525548  | 2.837833  | 0.205000  |
| 17          |           |           |           | O             | -3.025912 | -0.888898 | -0.955123 |
| <b>T1-2</b> |           |           |           | H             | 0.194800  | -1.464006 | 2.640437  |
| C           | 0.813295  | 1.717534  | 0.030456  | H             | -0.426752 | -2.941404 | 0.657884  |
| C           | -0.253813 | 2.090156  | -0.874847 | O             | 3.083360  | -1.017341 | -1.382205 |
| C           | -1.564720 | 1.732964  | -0.674571 | H             | -0.754192 | 0.666772  | 1.152963  |
| C           | -1.963294 | 0.924916  | 0.457548  | 19            |           |           |           |
| C           | -0.917273 | 0.437161  | 1.343703  | <b>T24-25</b> |           |           |           |
| C           | 0.475872  | 0.873575  | 1.161461  | C             | 2.684257  | -0.370613 | -0.285068 |
| O           | -2.593383 | -0.823693 | -0.250962 | C             | 1.946333  | 0.403389  | 0.745696  |
| O           | 3.023353  | -0.363238 | 0.370785  | C             | 0.762579  | -0.128771 | 1.375444  |
| O           | 0.589052  | -1.302733 | -1.003689 | C             | 0.209999  | -1.397113 | 0.900244  |
| H           | -2.340092 | 2.083502  | -1.356981 | C             | 0.848304  | -2.048729 | -0.236102 |
| H           | 1.109897  | 0.878373  | 2.052759  | C             | 2.009916  | -1.587373 | -0.779963 |
| H           | 1.697477  | 2.360742  | 0.070779  | O             | -1.240808 | -1.502596 | 0.960059  |
| H           | -0.004880 | 2.733107  | -1.723473 | O             | -0.760897 | 0.713572  | -1.345619 |
| H           | -1.222515 | 0.092821  | 2.337784  | H             | 0.423346  | 0.232551  | 2.351635  |
| Mn          | -0.939156 | -1.192030 | 0.042920  | H             | 2.494296  | -2.109307 | -1.608701 |
| Mn          | 1.570799  | -0.175628 | -0.203643 | H             | 2.521743  | 1.193265  | 1.236091  |
| H           | -2.975071 | 1.024682  | 0.847337  | Mn            | -1.867199 | -0.275188 | -0.356514 |
| 17          |           |           |           | Mn            | 0.236421  | 1.236051  | -0.020956 |
| <b>T1-3</b> |           |           |           | O             | -0.010932 | 2.650093  | 0.598158  |
| C           | -0.576450 | 1.152906  | 0.685418  | O             | -3.463056 | -0.174109 | -0.298474 |
| C           | 0.533180  | 0.375136  | 1.234554  | H             | 0.244985  | -2.375488 | 1.971054  |
| C           | 1.847272  | 0.611758  | 0.675506  | H             | 0.355560  | -2.944225 | -0.625477 |
| C           | 2.050784  | 1.728949  | -0.200913 | O             | 3.796250  | -0.028327 | -0.699357 |
| C           | 1.000959  | 2.540842  | -0.588801 | H             | -0.754964 | -2.361156 | 1.905628  |
| C           | -0.325868 | 2.174507  | -0.227709 | 19            |           |           |           |

|             |           |           |           |            |           |           |           |
|-------------|-----------|-----------|-----------|------------|-----------|-----------|-----------|
| O           | 1.525078  | -2.347542 | 0.467918  | <b>I26</b> |           |           |           |
| O           | -2.942026 | 0.293624  | 0.683449  | C          | 1.670650  | 1.832594  | -1.009892 |
| O           | -0.252099 | -0.964630 | -1.414526 | C          | 0.349496  | 2.162410  | -1.175980 |
| H           | 3.064659  | 1.943007  | -0.548875 | C          | -0.644409 | 1.778990  | -0.206333 |
| H           | 2.723938  | 0.154613  | 1.143765  | C          | -0.242844 | 1.165455  | 1.003074  |
| H           | 0.400808  | -0.128747 | 2.197205  | C          | 1.130758  | 0.756160  | 1.187403  |
| H           | -1.910862 | 0.989312  | 1.050844  | C          | 2.096714  | 1.068639  | 0.139017  |
| H           | -1.172176 | 2.689699  | -0.693173 | O          | -1.080737 | 0.934267  | 2.033828  |
| H           | 1.174912  | 3.405098  | -1.232511 | O          | 2.474538  | -1.937149 | 0.638896  |
| Mn          | -1.617631 | -0.391477 | -0.201376 | O          | 0.225759  | -1.240146 | -1.135201 |
| Mn          | 0.893304  | -1.064891 | -0.169837 | H          | -1.655258 | 2.192228  | -0.271060 |
| 17          |           |           |           | H          | 0.026696  | 2.733340  | -2.048398 |
| <b>T1-5</b> |           |           |           | H          | 2.418341  | 2.152417  | -1.737268 |
| C           | -1.704410 | 1.397357  | -0.101330 | H          | 3.162159  | 1.037630  | 0.384293  |
| C           | -1.272172 | 0.917779  | 1.187030  | H          | 1.444159  | 0.513336  | 2.206404  |
| C           | 0.131912  | 0.710526  | 1.380084  | Mn         | -1.330845 | -0.458566 | -0.572726 |
| C           | 1.085696  | 1.206645  | 0.452565  | Mn         | 1.475688  | -0.884780 | 0.004857  |
| C           | 0.607165  | 1.960980  | -0.682119 | H          | -2.008784 | 0.858943  | 1.681000  |
| C           | -0.736551 | 2.053336  | -0.958122 | O          | -2.776853 | -1.366138 | 0.078733  |
| O           | 3.136448  | -0.207906 | 0.486847  | O          | -2.989029 | 0.047949  | 0.178495  |
| O           | -2.550944 | -1.489073 | 0.283421  | 19         |           |           |           |
| O           | 0.009231  | -1.226576 | -1.062931 | <b>I27</b> |           |           |           |
| H           | 0.466761  | 0.202252  | 2.290119  | C          | 1.866861  | 1.765316  | -0.830950 |
| H           | 2.453577  | 0.810869  | 0.667802  | C          | 0.571244  | 2.127322  | -1.113182 |
| H           | -1.095044 | 2.608368  | -1.828446 | C          | -0.528782 | 1.716366  | -0.280134 |
| H           | -2.765702 | 1.586062  | -0.274105 | C          | -0.269541 | 1.153390  | 1.057485  |
| H           | -1.984617 | 0.728936  | 1.993989  | C          | 1.105284  | 0.667241  | 1.285619  |
| H           | 1.337432  | 2.445398  | -1.335870 | C          | 2.158419  | 0.977439  | 0.341016  |
| Mn          | 1.601103  | -0.707780 | -0.174733 | O          | -1.178711 | 1.003231  | 1.923169  |
| Mn          | -1.274708 | -0.671148 | -0.098900 | O          | 2.150989  | -2.107410 | 0.680402  |
| 17          |           |           |           | O          | 0.234013  | -1.113069 | -1.296678 |
| <b>T2-7</b> |           |           |           | H          | -1.485786 | 2.243399  | -0.386241 |
| C           | -1.152839 | 1.952183  | 0.273834  | H          | 0.354530  | 2.727367  | -2.000352 |
| C           | -2.063727 | 1.229029  | -0.584849 | H          | 2.686471  | 2.068667  | -1.483738 |
| C           | -2.340568 | -0.098491 | -0.433196 | H          | 3.199533  | 0.859839  | 0.655685  |
| C           | -1.652899 | -0.968388 | 0.582846  | H          | 1.341734  | 0.354312  | 2.306498  |
| C           | -0.514334 | -0.218255 | 1.253478  | Mn         | -1.273648 | -0.322143 | -0.709932 |
| C           | -0.438694 | 1.235303  | 1.250005  | Mn         | 1.360862  | -0.916379 | 0.013184  |

|             |           |           |           |            |           |           |           |
|-------------|-----------|-----------|-----------|------------|-----------|-----------|-----------|
| O           | -0.908544 | -2.078915 | -0.068022 | H          | -2.591468 | 0.392576  | 1.160935  |
| O           | 2.092513  | -0.753201 | 0.475464  | O          | -2.567099 | -1.346309 | 0.191003  |
| O           | 0.732066  | -0.037612 | -1.560719 | O          | -3.027475 | 0.047863  | 0.302952  |
| H           | -3.093177 | -0.576748 | -1.064613 | 19         |           |           |           |
| H           | -2.358929 | -1.448190 | 1.288432  | <b>I28</b> |           |           |           |
| H           | 0.029855  | 1.742638  | 2.103580  | C          | -0.978878 | 0.628373  | 1.976396  |
| H           | -1.157667 | 3.043640  | 0.275421  | C          | 0.352252  | 0.909750  | 1.725536  |
| H           | -2.592621 | 1.791344  | -1.359142 | C          | 0.829358  | 1.373631  | 0.429151  |
| H           | -0.065146 | -0.729154 | 2.110325  | C          | -0.216995 | 1.781339  | -0.570974 |
| Mn          | 0.622198  | -1.203592 | -0.324394 | C          | -1.563076 | 1.159105  | -0.370916 |
| Mn          | 1.293417  | 1.073013  | -0.051538 | C          | -1.981365 | 0.777691  | 0.951989  |
| 17          |           |           |           | O          | -0.005582 | 2.583363  | -1.472278 |
| <b>T3-4</b> |           |           |           | O          | -2.648301 | -1.466006 | -0.870133 |
| C           | -2.137269 | 1.689956  | -0.211826 | O          | 0.213379  | -1.544487 | -0.461989 |
| C           | -2.705091 | 0.525836  | -0.701012 | H          | 1.736117  | 1.989981  | 0.414980  |
| C           | -2.107034 | -0.745511 | -0.453644 | H          | 1.091958  | 0.761877  | 2.514693  |
| C           | -0.963991 | -0.787243 | 0.331490  | H          | -1.281291 | 0.284060  | 2.967722  |
| C           | -0.452953 | 0.358702  | 1.068981  | H          | -3.042224 | 0.740349  | 1.212565  |
| C           | -0.991682 | 1.636424  | 0.646265  | H          | -2.312645 | 1.435768  | -1.115983 |
| O           | -0.437306 | -2.354235 | 1.188758  | Mn         | 1.508267  | -0.444830 | -0.194713 |
| O           | 1.967013  | 2.082864  | 0.550867  | Mn         | -1.395313 | -0.869152 | -0.101707 |
| O           | 1.488138  | -0.241421 | -1.180654 | H          | 3.198460  | -1.502487 | 1.038628  |
| H           | -2.456267 | -1.627655 | -0.996818 | O          | 2.321962  | -0.068814 | -1.477519 |
| H           | -3.580088 | 0.572706  | -1.353945 | O          | 2.510792  | -0.833974 | 1.223269  |
| H           | -2.577108 | 2.660220  | -0.448744 | 19         |           |           |           |
| H           | -0.731227 | 2.519907  | 1.235383  | <b>I29</b> |           |           |           |
| H           | -0.009297 | 0.198086  | 2.055853  | C          | -1.543957 | 1.779310  | -0.784923 |
| Mn          | 0.691024  | -1.606200 | -0.283828 | C          | -0.246564 | 1.416796  | -1.165520 |
| Mn          | 0.948631  | 1.136377  | -0.222483 | C          | 0.172274  | 0.051680  | -1.105343 |
| H           | -1.184976 | -2.943370 | 0.985471  | C          | -0.826267 | -0.981722 | -1.034876 |
| 17          |           |           |           | C          | -2.183940 | -0.605655 | -0.800274 |
| <b>T5-6</b> |           |           |           | C          | -2.507990 | 0.748075  | -0.534602 |
| C           | 1.229059  | 1.599299  | 0.175017  | O          | -1.635360 | -0.620979 | 1.933783  |
| C           | 0.307214  | 2.230098  | -0.753197 | O          | 0.704777  | 0.758522  | 1.319790  |
| C           | -1.025914 | 1.876809  | -0.793903 | H          | 0.530609  | 2.183598  | -1.215950 |
| C           | -1.437175 | 0.891006  | 0.146741  | H          | -1.814021 | 2.825121  | -0.635585 |
| C           | -0.699642 | 0.465480  | 1.279453  | H          | -3.512643 | 1.007427  | -0.200760 |
| C           | 0.715997  | 0.799215  | 1.283304  | H          | -2.927485 | -1.384751 | -0.604734 |

|            |           |           |           |            |           |           |           |
|------------|-----------|-----------|-----------|------------|-----------|-----------|-----------|
| O          | -3.067074 | -0.247884 | 0.399406  | Mn         | 1.687634  | -0.042633 | 0.114129  |
| O          | 3.004389  | -0.884692 | 0.234207  | Mn         | -0.922484 | 0.174603  | 0.770372  |
| O          | 0.297133  | -1.281174 | -0.980670 | H          | 3.614483  | 1.288988  | -0.091134 |
| H          | -1.707755 | 2.302209  | -1.532720 | O          | 2.134138  | -1.535635 | 0.371645  |
| H          | 0.687940  | 2.983356  | -1.447166 | O          | 2.852942  | 1.059990  | -0.656652 |
| H          | 2.219973  | 2.045802  | 0.291415  | O          | -0.437720 | -2.262601 | -1.204228 |
| H          | 1.271772  | 0.713130  | 2.220651  | H          | -1.151246 | -2.864911 | -0.925838 |
| H          | -1.200214 | 0.113628  | 2.186087  | 19         |           |           |           |
| Mn         | -1.302905 | -1.015447 | -0.126251 | <b>I30</b> |           |           |           |
| Mn         | 1.536614  | -0.426051 | -0.135742 | C          | 0.257949  | -1.051426 | 1.972839  |
| H          | -3.527263 | 0.017866  | -0.416489 | C          | -1.042420 | -0.731046 | 1.665136  |
| 19         |           |           |           | C          | -1.519361 | -0.745325 | 0.284404  |
| <b>I10</b> |           |           |           | C          | -0.620818 | -1.230293 | -0.722044 |
| C          | 0.517575  | 0.950247  | 0.659748  | C          | 0.767056  | -1.469655 | -0.442071 |
| C          | 0.080901  | 2.225929  | 0.160290  | C          | 1.228134  | -1.382987 | 0.948541  |
| C          | -1.250113 | 2.438165  | -0.051654 | O          | -1.121165 | -1.560939 | -1.915078 |
| C          | -2.193492 | 1.282410  | 0.095718  | O          | 3.241223  | 0.202265  | -0.802872 |
| C          | -1.790145 | 0.301890  | 1.185777  | O          | 0.982002  | 1.675726  | 0.318355  |
| C          | -0.407495 | 0.098888  | 1.394173  | H          | -1.772330 | -0.489773 | 2.439830  |
| O          | -2.009805 | 0.381943  | -1.057831 | H          | 0.576571  | -1.067488 | 3.016838  |
| O          | 2.550508  | 0.860248  | -1.159448 | H          | 2.122362  | -1.940013 | 1.242015  |
| O          | 0.599529  | -1.196847 | -0.837825 | H          | 1.323037  | -2.056148 | -1.179273 |
| H          | -1.611205 | 3.370285  | -0.492268 | Mn         | -0.783884 | 1.240589  | -0.048235 |
| H          | -0.026874 | -0.594165 | 2.150361  | Mn         | 1.812620  | 0.249940  | -0.125966 |
| H          | 3.189917  | -0.212594 | 1.741882  | H          | -2.098856 | -1.425528 | -1.830502 |
| H          | 0.831174  | 2.959569  | -0.142327 | O          | -2.382568 | 1.673907  | -0.250041 |
| Mn         | -1.088086 | -0.955323 | -0.290989 | O          | -2.862896 | -0.835116 | -0.032718 |
| Mn         | 1.792716  | -0.098416 | -0.156634 | H          | -3.145208 | 0.133360  | -0.115851 |
| O          | 2.756277  | -0.835348 | 1.130117  | 19         |           |           |           |
| O          | -1.889542 | -2.254642 | 0.089811  | <b>I31</b> |           |           |           |
| H          | -3.250499 | 1.580855  | 0.149410  | C          | 0.884266  | 1.684635  | -1.573036 |
| H          | -2.547389 | -0.188477 | 1.800607  | C          | -0.424583 | 1.829165  | -1.232552 |
| 19         |           |           |           | C          | -0.917244 | 1.416164  | 0.088259  |
| <b>I11</b> |           |           |           | C          | 0.084427  | 1.168178  | 1.115728  |
| C          | 1.051856  | 1.551725  | 0.461968  | C          | 1.464553  | 1.061259  | 0.782295  |
| C          | 0.416566  | 2.512525  | -0.439191 | C          | 1.840485  | 1.149395  | -0.617937 |
| C          | -0.920878 | 2.497870  | -0.629739 | O          | -0.245633 | 1.083233  | 2.409425  |
| C          | -1.818909 | 1.460476  | -0.011791 | O          | 2.754359  | -1.508066 | 0.139325  |



|            |           |           |           |            |           |           |           |
|------------|-----------|-----------|-----------|------------|-----------|-----------|-----------|
| C          | -1.185307 | 0.628144  | 1.103374  | O          | -0.118710 | -1.649976 | -0.466607 |
| C          | 0.256581  | 0.721555  | 1.284024  | H          | -1.853992 | 1.866288  | 0.437895  |
| O          | -2.099278 | 0.428632  | -1.030873 | H          | -1.159574 | 2.206611  | -1.944206 |
| O          | 2.341875  | 1.267651  | 0.385291  | H          | 1.234640  | 1.960951  | -2.568775 |
| O          | 0.158822  | -1.560815 | -0.439652 | H          | 2.904114  | 1.206818  | -0.855989 |
| H          | -1.391221 | 3.211608  | -1.311877 | H          | 2.196764  | 1.044810  | 1.593194  |
| H          | 0.729611  | 0.242797  | 2.151012  | Mn         | -1.466726 | -0.553484 | -0.170704 |
| H          | 3.938598  | -1.080333 | -0.477899 | Mn         | 1.355039  | -0.783366 | -0.067631 |
| H          | 1.072012  | 3.214004  | -0.960824 | H          | -1.179293 | 0.774722  | 2.469854  |
| Mn         | -1.428081 | -0.958712 | -0.134273 | O          | -2.105452 | -0.721569 | 1.287080  |
| Mn         | 1.637791  | -0.533527 | -0.020241 | O          | -2.402302 | -0.390090 | -1.437992 |
| O          | 3.071370  | -1.520828 | -0.520339 | 19         |           |           |           |
| O          | -2.448983 | -1.969830 | 0.551564  | <b>I32</b> |           |           |           |
| H          | -2.787826 | 1.890364  | 0.291183  | C          | 1.109977  | 1.281883  | -1.773303 |
| H          | -1.793839 | 0.435286  | 1.991464  | C          | -0.235776 | 1.425599  | -1.607720 |
| 19         |           |           |           | C          | -0.875761 | 1.340091  | -0.288078 |
| <b>I12</b> |           |           |           | C          | 0.013728  | 1.444938  | 0.922624  |
| C          | 2.015574  | 1.071355  | 0.258624  | C          | 1.438287  | 1.114903  | 0.707687  |
| C          | 1.523248  | 2.200439  | -0.558681 | C          | 1.985214  | 1.061589  | -0.628512 |
| C          | 0.231566  | 2.587613  | -0.568995 | O          | -0.438707 | 1.730869  | 2.039415  |
| C          | -0.839650 | 1.947577  | 0.259809  | O          | 2.688771  | -1.528816 | 0.705785  |
| C          | -0.400636 | 0.732926  | 1.072399  | O          | -0.108406 | -1.575388 | -0.161209 |
| C          | 0.984493  | 0.254603  | 0.982545  | H          | -1.814214 | 1.896539  | -0.168150 |
| O          | -1.863311 | 1.401604  | -0.629885 | H          | -0.885922 | 1.578318  | -2.472391 |
| O          | 2.377201  | -2.109624 | -0.097529 | H          | 1.553943  | 1.322930  | -2.769442 |
| O          | -0.891909 | -1.440185 | -1.038875 | H          | 3.066174  | 1.151993  | -0.766044 |
| H          | -0.099733 | 3.406282  | -1.216081 | H          | 2.092679  | 1.252485  | 1.572262  |
| H          | 1.394809  | -0.228295 | 1.881762  | Mn         | -1.539014 | -0.581911 | -0.118144 |
| H          | 2.278947  | 2.708238  | -1.163578 | Mn         | 1.478275  | -0.793571 | 0.010781  |
| Mn         | -1.759085 | -0.294352 | -0.099750 | O          | -2.280574 | -0.334606 | 1.435604  |
| Mn         | 0.730792  | -1.411742 | -0.185003 | O          | -2.505318 | -0.702824 | -1.349997 |
| O          | -2.827158 | -0.876690 | 0.924785  | H          | -1.954324 | 0.456901  | 1.934855  |
| H          | -1.323287 | 2.702736  | 0.908368  | 17         |           |           |           |
| H          | -0.880157 | 0.629755  | 2.052142  | <b>I33</b> |           |           |           |
| O          | 3.218683  | 0.799937  | 0.326903  | C          | -1.873795 | -0.075890 | 1.549845  |
| H          | 3.141140  | -1.533778 | 0.098803  | C          | -0.450758 | -0.165198 | 1.644036  |
| 19         |           |           |           | C          | 0.353338  | 0.644495  | 0.820898  |
| <b>I13</b> |           |           |           | C          | -0.210139 | 1.784583  | 0.032008  |

|            |           |           |           |               |           |           |           |
|------------|-----------|-----------|-----------|---------------|-----------|-----------|-----------|
| C          | 2.163751  | 0.900675  | 0.334215  | C             | -1.585637 | 1.427510  | -0.390678 |
| C          | 1.792302  | 2.012030  | -0.571068 | C             | -2.430018 | 0.734258  | 0.523460  |
| C          | 0.542606  | 2.512079  | -0.632858 | O             | 0.399453  | 2.772905  | -0.342378 |
| C          | -0.584094 | 2.015534  | 0.216743  | O             | -2.317391 | -1.464325 | -1.087284 |
| C          | -0.298308 | 0.766457  | 1.044942  | O             | 0.507161  | -1.049457 | -1.035079 |
| C          | 1.023247  | 0.103338  | 0.931260  | H             | 0.005546  | -0.940890 | 2.264635  |
| O          | -1.681117 | 1.555420  | -0.643972 | H             | -2.514707 | -0.681339 | 2.192096  |
| O          | 1.339829  | -2.774594 | 0.220170  | H             | -3.499862 | 0.665843  | 0.316672  |
| O          | -0.897770 | -1.318037 | -0.924094 | H             | -2.019097 | 1.970329  | -1.233433 |
| H          | 0.297766  | 3.330769  | -1.317048 | Mn            | 1.771716  | -0.322419 | -0.043574 |
| H          | 1.347709  | -0.449776 | 1.823832  | Mn            | -1.132422 | -0.682869 | -0.401676 |
| H          | 2.608632  | 2.433066  | -1.163629 | O             | 2.651812  | 0.755683  | -0.775605 |
| Mn         | -1.784179 | -0.104360 | -0.057373 | O             | 2.412443  | -1.262342 | 1.054577  |
| Mn         | 0.759622  | -1.432801 | -0.358382 | 17            |           |           |           |
| O          | -2.892424 | -0.499687 | 0.977596  | <b>I34</b>    |           |           |           |
| H          | -0.979725 | 2.834652  | 0.845687  | C             | 2.462227  | 1.712974  | -0.419997 |
| H          | -0.733220 | 0.763787  | 2.050568  | C             | 1.164476  | 2.119233  | -0.783500 |
| O          | 3.333099  | 0.633652  | 0.594226  | C             | 0.053823  | 1.538444  | -0.151548 |
| H          | 1.622816  | -1.118161 | -1.576342 | C             | 0.252005  | 0.653373  | 0.982203  |
| 19         |           |           |           | C             | 1.566922  | 0.179252  | 1.273626  |
| <b>I14</b> |           |           |           | C             | 2.669813  | 0.735749  | 0.561601  |
| C          | 2.407072  | -0.067032 | -0.115871 | O             | -0.847354 | 0.166181  | 1.547525  |
| C          | 2.318781  | -1.388791 | 0.555637  | O             | 1.887863  | -2.466872 | -0.102912 |
| C          | 1.332587  | -2.273235 | 0.308695  | O             | -0.833565 | -1.135381 | -0.788556 |
| C          | 0.180342  | -1.999998 | -0.612166 | H             | 0.997486  | 2.821238  | -1.603037 |
| C          | 0.102882  | -0.568168 | -1.143047 | H             | 3.320078  | 2.139115  | -0.943629 |
| C          | 1.230507  | 0.358064  | -0.930045 | H             | 3.677790  | 0.393539  | 0.799026  |
| O          | -1.058031 | -2.118526 | 0.137765  | H             | 1.718239  | -0.492236 | 2.122743  |
| O          | -0.079821 | 2.910464  | -0.437831 | Mn            | -1.900101 | -0.016921 | -0.020464 |
| O          | -0.846476 | 0.522308  | 1.555698  | Mn            | 0.967555  | -1.170196 | -0.402321 |
| H          | 1.319342  | -3.250935 | 0.801699  | O             | -3.427116 | -0.315513 | 0.093207  |
| H          | 1.491864  | 1.034503  | -1.752982 | O             | -1.206770 | 1.649349  | -0.571737 |
| H          | 3.145857  | -1.629523 | 1.229295  | 19            |           |           |           |
| Mn         | -1.574820 | -0.417908 | 0.124577  | <b>T26-27</b> |           |           |           |
| Mn         | 0.023531  | 1.478551  | 0.191052  | C             | 1.803285  | 1.822946  | -0.809381 |
| O          | -2.847822 | 0.007580  | -0.689846 | C             | 0.503322  | 2.169311  | -1.082372 |
| H          | 0.161247  | -2.743016 | -1.434200 | C             | -0.585659 | 1.735067  | -0.244791 |
| H          | -0.401644 | -0.480802 | -2.112491 | C             | -0.311027 | 1.122767  | 1.041664  |

|            |           |           |           |               |           |           |           |
|------------|-----------|-----------|-----------|---------------|-----------|-----------|-----------|
| O          | 3.416281  | 0.634226  | -0.004141 | C             | 1.057953  | 0.684113  | 1.292261  |
| H          | -1.040513 | 0.540239  | 2.505579  | C             | 2.108571  | 1.015528  | 0.347481  |
| 19         |           |           |           | O             | -1.242991 | 0.884237  | 1.910065  |
| <b>I15</b> |           |           |           | O             | 2.236088  | -2.048487 | 0.660632  |
| C          | -2.583806 | -0.674320 | -0.353072 | O             | 0.250886  | -1.121736 | -1.295879 |
| C          | -1.764188 | -1.877338 | -0.621112 | H             | -1.560126 | 2.225708  | -0.350241 |
| C          | -0.647445 | -2.159764 | 0.077713  | H             | 0.271129  | 2.780451  | -1.957414 |
| C          | -0.108844 | -1.302151 | 1.192011  | H             | 2.617661  | 2.154313  | -1.454973 |
| C          | -0.808255 | 0.045473  | 1.342989  | H             | 3.150302  | 0.920550  | 0.666887  |
| C          | -2.032581 | 0.303356  | 0.631309  | H             | 1.289779  | 0.360240  | 2.310527  |
| O          | 1.319125  | -1.146529 | 1.079084  | Mn            | -1.292481 | -0.354763 | -0.758085 |
| O          | -0.544910 | 2.801184  | 0.494536  | Mn            | 1.378137  | -0.894184 | 0.010130  |
| O          | 0.883063  | 0.678188  | -1.050247 | H             | -2.246073 | 0.485773  | 1.263870  |
| H          | -0.068327 | -3.065683 | -0.127782 | O             | -2.487232 | -1.364158 | 0.232459  |
| H          | -2.760294 | 1.025827  | 1.014072  | O             | -2.897095 | 0.024924  | 0.361605  |
| H          | -2.132863 | -2.543212 | -1.405402 | 19            |           |           |           |
| Mn         | 2.059261  | -0.330271 | -0.299412 | <b>T26-31</b> |           |           |           |
| Mn         | -0.493715 | 1.357223  | -0.150077 | C             | -0.997802 | 0.453621  | 1.843481  |
| O          | 3.552714  | 0.112086  | -0.243712 | C             | 0.408632  | 0.545782  | 1.781276  |
| H          | -0.238890 | -1.859254 | 2.143718  | C             | 1.054348  | 1.252076  | 0.702627  |
| H          | -0.630838 | 0.551924  | 2.297244  | C             | 0.233945  | 1.670221  | -0.401023 |
| O          | -3.672326 | -0.492321 | -0.899974 | C             | -1.185373 | 1.551206  | -0.344159 |
| H          | 2.061931  | -1.415811 | -1.341174 | C             | -1.821722 | 1.067567  | 0.850808  |
| 19         |           |           |           | O             | 0.756175  | 2.284881  | -1.487838 |
| <b>I16</b> |           |           |           | O             | -3.045780 | -1.085334 | -0.621988 |
| C          | -2.421172 | -0.695032 | -0.446012 | O             | -0.097829 | -1.601306 | -0.615258 |
| C          | -1.546431 | -1.867640 | -0.732429 | H             | 2.071111  | 1.633869  | 0.823520  |
| C          | -0.511298 | -2.214144 | 0.057842  | H             | 1.021691  | 0.176653  | 2.605684  |
| C          | -0.102388 | -1.421624 | 1.266378  | H             | -1.467841 | -0.032537 | 2.701209  |
| C          | -0.764326 | -0.073531 | 1.389957  | H             | -2.888900 | 1.217866  | 1.013329  |
| C          | -1.957187 | 0.222764  | 0.617983  | H             | -1.770014 | 2.021724  | -1.137684 |
| O          | 1.373396  | -1.155175 | 1.204895  | Mn            | 1.183937  | -0.602571 | -0.065151 |
| O          | -0.334547 | 2.765011  | 0.693488  | Mn            | -1.542620 | -0.624278 | -0.261462 |
| O          | 0.611612  | 0.960503  | -1.330227 | H             | 1.717378  | 2.115932  | -1.522425 |
| H          | 0.059293  | -3.128389 | -0.144996 | O             | 2.776917  | -1.069712 | 0.753421  |
| H          | -2.718981 | 0.902068  | 1.012433  | O             | 2.626952  | -0.491669 | -0.892883 |
| H          | -1.834809 | -2.477423 | -1.592351 | 19            |           |           |           |
| Mn         | 1.818719  | -0.014143 | -0.378290 | <b>T27-28</b> |           |           |           |

|            |           |           |           |               |           |           |           |
|------------|-----------|-----------|-----------|---------------|-----------|-----------|-----------|
| Mn         | -0.400822 | 1.350036  | 0.006451  | C             | 1.799296  | 1.712617  | -1.012492 |
| O          | 3.314774  | -0.628837 | -0.605407 | C             | 0.476388  | 2.054562  | -1.222404 |
| H          | -0.234654 | -2.017013 | 2.189926  | C             | -0.548370 | 1.717599  | -0.284924 |
| H          | -0.666099 | 0.389455  | 2.377332  | C             | -0.193886 | 1.224025  | 1.062829  |
| O          | -3.482839 | -0.540870 | -1.052222 | C             | 1.203088  | 0.742647  | 1.209515  |
| H          | 1.905476  | -1.975841 | 1.247105  | C             | 2.185158  | 1.023488  | 0.185271  |
| 17         |           |           |           | O             | -1.025984 | 1.148891  | 1.994653  |
| <b>I17</b> |           |           |           | O             | 2.165736  | -2.077786 | 0.720215  |
| C          | 2.499920  | -0.053831 | -0.202885 | O             | 0.192165  | -1.157144 | -1.228498 |
| C          | 2.431747  | -1.361940 | 0.496279  | H             | -1.517330 | 2.222549  | -0.359344 |
| C          | 1.331923  | -2.160250 | 0.452478  | H             | 0.196416  | 2.594379  | -2.130527 |
| C          | 0.167906  | -1.752789 | -0.302026 | H             | 2.563574  | 1.973454  | -1.745962 |
| C          | 0.187766  | -0.578275 | -1.144855 | H             | 3.248058  | 0.927016  | 0.426209  |
| C          | 1.279771  | 0.377319  | -0.952642 | H             | 1.519063  | 0.488111  | 2.225357  |
| O          | -1.027595 | -2.228625 | -0.030964 | Mn            | -1.310389 | -0.410180 | -0.558044 |
| O          | -0.316892 | 2.837239  | -0.243398 | Mn            | 1.368666  | -0.909551 | 0.019297  |
| O          | -1.007379 | 0.411180  | 1.413186  | H             | -2.807790 | 0.451516  | 1.113443  |
| H          | 1.265638  | -3.097189 | 1.011743  | O             | -2.553724 | -1.465287 | 0.126852  |
| H          | 1.487815  | 1.101171  | -1.748904 | O             | -3.051814 | 0.237152  | 0.175870  |
| H          | 3.324900  | -1.646452 | 1.058166  | 19            |           |           |           |
| Mn         | -1.593123 | -0.415157 | 0.015409  | <b>T28-29</b> |           |           |           |
| Mn         | 0.049061  | 1.402810  | 0.328104  | C             | -1.221304 | 1.434891  | 1.564426  |
| O          | -2.989418 | -0.052404 | -0.576451 | C             | 0.151302  | 1.487145  | 1.255787  |
| H          | -0.379981 | -0.612998 | -2.083434 | C             | 0.548830  | 1.231688  | -0.093084 |
| O          | 3.529908  | 0.625451  | -0.175308 | C             | -0.449777 | 1.365498  | -1.149748 |
| 19         |           |           |           | C             | -1.831320 | 1.193940  | -0.844869 |
| <b>I8</b>  |           |           |           | C             | -2.205245 | 1.249176  | 0.531219  |
| C          | 0.922373  | 1.734920  | 0.605272  | O             | 0.174134  | 1.604765  | -2.248038 |
| C          | 0.257135  | 2.440623  | -0.486998 | O             | -2.098281 | -1.524094 | -0.145022 |
| C          | -1.073691 | 2.323635  | -0.705111 | O             | 0.386370  | -1.284717 | 1.017732  |
| C          | -1.948874 | 1.392621  | 0.082203  | H             | 1.201486  | 1.531767  | -1.326167 |
| C          | -1.202339 | 0.565337  | 1.133901  | H             | 0.894309  | 1.485337  | 2.055600  |
| C          | 0.209660  | 0.845512  | 1.396663  | H             | -1.550735 | 1.487905  | 2.602804  |
| O          | -2.460800 | 0.347375  | -0.833333 | H             | -3.257915 | 1.181401  | 0.806694  |
| O          | 0.099358  | -1.206510 | -0.660360 | H             | -2.577980 | 1.077309  | -1.631581 |
| H          | -1.561819 | 2.899178  | -1.495614 | Mn            | 1.595054  | -0.554097 | 0.013684  |
| H          | -2.837355 | 1.905190  | 0.492247  | Mn            | -1.046367 | -0.464741 | 0.327469  |
| H          | 0.658846  | 0.438142  | 2.308897  | H             | 3.335861  | -0.696927 | 1.589957  |

|               |           |           |           |               |           |           |           |
|---------------|-----------|-----------|-----------|---------------|-----------|-----------|-----------|
| H             | 1.932261  | 2.037166  | 0.895578  | O             | 1.918792  | -1.159256 | -1.403632 |
| H             | 0.856046  | 3.117076  | -1.101596 | O             | 2.921574  | 0.010492  | 1.060211  |
| H             | -1.791089 | 0.275457  | 2.010937  | 19            |           |           |           |
| Mn            | -1.507856 | -0.977038 | -0.138728 | <b>T29-30</b> |           |           |           |
| Mn            | 1.633552  | -0.355111 | -0.135564 | C             | -0.883757 | 1.404222  | 1.893935  |
| O             | -2.229403 | -2.177789 | 0.613970  | C             | 0.452369  | 1.399411  | 1.602028  |
| O             | 3.254528  | -1.104910 | -0.514597 | C             | 0.774111  | 0.949121  | 0.267621  |
| O             | 3.413206  | -0.006211 | 0.343231  | C             | -0.118523 | 1.299134  | -0.832172 |
| 19            |           |           |           | C             | -1.504741 | 1.303916  | -0.529410 |
| <b>I9</b>     |           |           |           | C             | -1.855406 | 1.086590  | 0.863310  |
| C             | 0.710146  | 1.126465  | 0.979983  | O             | 0.308138  | 1.475743  | -2.091404 |
| C             | 0.305661  | 2.252682  | 0.126031  | O             | -2.859506 | -1.377455 | -0.103065 |
| C             | -0.959991 | 2.416594  | -0.321568 | O             | 0.084790  | -1.753590 | -0.418914 |
| C             | -2.022701 | 1.394678  | -0.050213 | H             | 1.229305  | 1.484500  | 2.362512  |
| C             | -1.706265 | 0.482939  | 1.120442  | H             | -1.225537 | 1.569702  | 2.918419  |
| C             | -0.364564 | 0.248238  | 1.483579  | H             | -2.913681 | 1.109408  | 1.123137  |
| O             | -1.996728 | 0.377469  | -1.109948 | H             | -2.230889 | 1.605396  | -1.288038 |
| O             | 2.632609  | 0.681153  | -1.049179 | Mn            | 1.434765  | -0.780238 | -0.000216 |
| O             | 0.481206  | -1.115800 | -0.961419 | Mn            | -1.405167 | -0.724690 | -0.201187 |
| H             | -1.217345 | 3.262461  | -0.962625 | H             | 1.297153  | 1.465461  | -2.043116 |
| H             | -0.127892 | -0.420557 | 2.314649  | O             | 2.368712  | 0.908917  | -0.724564 |
| H             | 1.498850  | 1.346876  | 1.710970  | O             | 2.450463  | -1.174727 | 1.147816  |
| H             | 1.084082  | 2.970111  | -0.143937 | H             | 3.098603  | 1.103270  | -0.108673 |
| Mn            | -1.130607 | -0.925964 | -0.225359 | 19            |           |           |           |
| Mn            | 1.732540  | -0.244405 | -0.139824 | <b>T31-32</b> |           |           |           |
| O             | 2.428926  | -1.100804 | 0.995950  | C             | 1.164093  | 1.849442  | -1.237265 |
| O             | -1.858369 | -2.254446 | 0.185709  | C             | -0.175042 | 1.942747  | -1.010610 |
| H             | -3.034501 | 1.826618  | -0.000710 | C             | -0.794260 | 1.375598  | 0.192286  |
| H             | -2.526364 | 0.043560  | 1.692810  | C             | 0.099184  | 0.950908  | 1.286422  |
| 19            |           |           |           | C             | 1.509068  | 0.837732  | 1.030097  |
| <b>T10-11</b> |           |           |           | C             | 2.036401  | 1.201660  | -0.266176 |
| C             | 0.365832  | 1.232293  | 0.473655  | O             | -0.396468 | 0.571420  | 2.420905  |
| C             | -0.439990 | 2.238392  | -0.157554 | O             | 2.597151  | -1.752137 | 0.120058  |
| C             | -1.798991 | 2.127071  | -0.155741 | O             | -0.157911 | -1.385857 | -0.717859 |
| C             | -2.412673 | 0.823375  | 0.250216  | H             | -1.718553 | 1.853068  | 0.540395  |
| C             | -1.619666 | 0.073551  | 1.308902  | H             | -0.835316 | 2.418404  | -1.738017 |
| C             | -0.223317 | 0.276708  | 1.385686  | H             | 1.605225  | 2.248227  | -2.152083 |
| O             | -2.217985 | -0.131523 | -0.858768 | H             | 3.118591  | 1.292238  | -0.384248 |

|               |           |           |           |               |           |           |           |
|---------------|-----------|-----------|-----------|---------------|-----------|-----------|-----------|
| O             | 2.042655  | 1.687127  | -0.143778 | H             | 2.162151  | 0.604190  | 1.874090  |
| O             | 0.661547  | -0.762501 | -1.323568 | Mn            | -1.602119 | -0.466637 | -0.269159 |
| H             | -2.430236 | 2.898893  | -0.600262 | Mn            | 1.430331  | -0.756923 | -0.275083 |
| H             | -3.487114 | 0.887815  | 0.476565  | H             | -1.358952 | 0.041482  | 2.107267  |
| H             | 0.384749  | -0.229726 | 2.140752  | O             | -2.145104 | -0.645842 | 1.287661  |
| H             | 0.066969  | 3.074730  | -0.642342 | O             | -2.612055 | -0.139729 | -1.437003 |
| H             | -2.141077 | -0.571477 | 2.020591  | 19            |           |           |           |
| Mn            | -0.803187 | -1.045136 | -0.252546 | <b>T31-33</b> |           |           |           |
| Mn            | 1.761250  | 0.052399  | -0.278732 | C             | -0.892784 | 1.082506  | 1.964161  |
| O             | -1.044982 | -2.519639 | 0.231505  | C             | 0.428638  | 1.255628  | 1.656610  |
| O             | 2.658848  | -0.899845 | 0.903439  | C             | 0.797538  | 1.131384  | 0.255881  |
| H             | 3.627307  | -0.859105 | 0.785030  | C             | -0.204068 | 1.628635  | -0.761211 |
| 19            |           |           |           | C             | -1.562024 | 1.193244  | -0.468228 |
| <b>T11-12</b> |           |           |           | C             | -1.866974 | 0.839482  | 0.914455  |
| C             | 1.918742  | 0.881209  | 0.244090  | O             | 0.152197  | 2.340160  | -1.710941 |
| C             | 1.597961  | 2.100936  | -0.477422 | O             | -2.727463 | -1.559666 | -0.496037 |
| C             | 0.353423  | 2.631709  | -0.463977 | O             | 0.137205  | -1.673755 | 0.091451  |
| C             | -0.795503 | 1.993335  | 0.251843  | H             | 1.875808  | 2.086236  | -0.214412 |
| C             | -0.450474 | 0.780343  | 1.107402  | H             | 1.211354  | 1.275767  | 2.417192  |
| C             | 0.914393  | 0.225857  | 1.063931  | H             | -1.211826 | 1.028167  | 3.006884  |
| O             | -1.689590 | 1.390923  | -0.749043 | H             | -2.921280 | 0.777525  | 1.192044  |
| O             | 3.128360  | 0.410135  | 0.144196  | H             | -2.349576 | 1.493986  | -1.162732 |
| O             | -0.813608 | -1.491141 | -1.043469 | Mn            | 1.531854  | -0.579168 | -0.036585 |
| H             | 0.128949  | 3.526313  | -1.051955 | Mn            | -1.360568 | -0.814376 | -0.208743 |
| H             | -1.379210 | 2.744299  | 0.813545  | O             | 2.075112  | -0.496273 | -1.513779 |
| H             | 1.295759  | -0.258199 | 1.976727  | O             | 2.522477  | -0.748042 | 1.186679  |
| H             | 2.410024  | 2.548685  | -1.054793 | H             | 1.635213  | 2.492241  | -0.934784 |
| H             | -0.947186 | 0.730845  | 2.081271  | 19            |           |           |           |
| Mn            | -1.667351 | -0.274549 | -0.133995 | <b>T32-33</b> |           |           |           |
| Mn            | 0.629662  | -1.427388 | -0.079495 | C             | -0.863503 | 1.251535  | 1.946612  |
| H             | 2.966973  | -0.712037 | 0.113999  | C             | 0.461928  | 1.350862  | 1.636085  |
| O             | -2.838473 | -0.737578 | 0.805467  | C             | 0.853842  | 1.097903  | 0.259087  |
| O             | 2.242769  | -1.786314 | -0.144243 | C             | -0.115737 | 1.520013  | -0.859869 |
| 19            |           |           |           | C             | -1.510646 | 1.201599  | -0.493492 |
| <b>T12-13</b> |           |           |           | C             | -1.837564 | 0.974065  | 0.901928  |
| C             | 2.317056  | 0.702831  | 0.308829  | O             | 0.226468  | 2.011432  | -1.922555 |
| C             | 1.993903  | 1.768527  | -0.670240 | O             | -2.850895 | -1.438825 | -0.475094 |
| C             | 0.784374  | 2.357389  | -0.729074 | O             | 0.078699  | -1.640819 | -0.230342 |

|               |           |           |           |               |           |           |           |
|---------------|-----------|-----------|-----------|---------------|-----------|-----------|-----------|
| C             | -0.346967 | 2.001668  | 0.183450  | H             | 1.981016  | 1.859437  | -0.303339 |
| C             | -0.150312 | 0.733714  | 1.013223  | H             | 1.237681  | 1.430437  | 2.401541  |
| C             | 1.151381  | 0.040200  | 0.993790  | H             | -1.197535 | 1.315035  | 2.984173  |
| O             | -1.538936 | 1.688787  | -0.600092 | H             | -2.895331 | 0.979715  | 1.176077  |
| O             | 1.416549  | -2.727502 | -0.274685 | H             | -2.275919 | 1.504079  | -1.213507 |
| O             | -1.111298 | -1.218608 | -0.998746 | Mn            | 1.517111  | -0.633584 | 0.005977  |
| H             | 0.577055  | 3.153821  | -1.450687 | Mn            | -1.449580 | -0.781375 | -0.155824 |
| H             | 1.438384  | -0.483309 | 1.918027  | O             | 2.382176  | -0.180747 | -1.268217 |
| H             | 2.818581  | 2.087187  | -1.312802 | O             | 2.313817  | -0.964537 | 1.323099  |
| Mn            | -1.808034 | 0.027686  | -0.065607 | H             | 2.329761  | 1.617379  | -1.055993 |
| Mn            | 0.432773  | -1.429647 | -0.136218 | 17            |           |           |           |
| O             | -2.905259 | -0.302377 | 1.007938  | <b>T33-34</b> |           |           |           |
| H             | -0.594369 | 2.862119  | 0.835420  | C             | -1.924021 | 0.332250  | 1.447493  |
| H             | -0.647148 | 0.747213  | 1.990398  | C             | -0.518077 | 0.353057  | 1.670696  |
| O             | 3.474532  | 0.388199  | 0.567793  | C             | 0.323625  | 0.876504  | 0.676131  |
| H             | 1.607694  | -1.571974 | -1.152267 | C             | -0.160684 | 1.803818  | -0.384962 |
| 19            |           |           |           | C             | -1.493046 | 1.280438  | -0.788530 |
| <b>T13-14</b> |           |           |           | C             | -2.405239 | 0.803859  | 0.191488  |
| C             | 2.638790  | 0.064917  | 0.191520  | O             | 0.443350  | 2.708139  | -0.930966 |
| C             | 2.402061  | -1.338163 | 0.601397  | O             | -2.037940 | -1.604272 | -1.135188 |
| C             | 1.419881  | -2.089552 | 0.067252  | O             | 0.522513  | -1.682712 | 0.068715  |
| C             | 0.431140  | -1.599633 | -0.958325 | H             | -0.084545 | -0.234481 | 2.482494  |
| C             | 0.614367  | -0.140571 | -1.361165 | H             | -2.602481 | -0.081471 | 2.194018  |
| C             | 1.665822  | 0.642251  | -0.781012 | H             | -3.451292 | 0.646871  | -0.077191 |
| O             | -0.889036 | -1.851624 | -0.416242 | H             | -1.847519 | 1.530387  | -1.791909 |
| O             | -0.530573 | 2.544292  | -0.627833 | Mn            | 1.727014  | -0.441230 | 0.010894  |
| O             | -0.803862 | 0.527921  | 1.519972  | Mn            | -1.059151 | -0.804761 | -0.195680 |
| H             | 1.271121  | -3.125628 | 0.387522  | O             | 2.538274  | -0.176641 | -1.305062 |
| H             | 2.020600  | 1.551523  | -1.277273 | O             | 2.078041  | 0.329100  | 1.419796  |
| H             | 3.090479  | -1.740513 | 1.349141  |               |           |           |           |
| Mn            | -1.772790 | -0.517080 | 0.351143  |               |           |           |           |
| Mn            | -0.136594 | 1.180064  | -0.019370 |               |           |           |           |
| O             | -3.217646 | -0.115608 | -0.159601 |               |           |           |           |
| H             | 0.510027  | -2.233134 | -1.864075 |               |           |           |           |
| H             | 0.206448  | 0.128960  | -2.341184 |               |           |           |           |
| O             | 3.602254  | 0.709433  | 0.605246  |               |           |           |           |
| H             | 0.314468  | 1.093377  | 1.521194  |               |           |           |           |
| 19            |           |           |           |               |           |           |           |

**T14-15**

|    |           |           |           |
|----|-----------|-----------|-----------|
| C  | 2.423025  | 0.614368  | 0.199478  |
| C  | 2.007183  | 1.651042  | -0.779066 |
| C  | 0.811836  | 2.268731  | -0.708842 |
| C  | -0.218201 | 1.945548  | 0.332067  |
| C  | 0.027141  | 0.636137  | 1.072315  |
| C  | 1.331144  | 0.000972  | 1.020041  |
| O  | -1.524472 | 1.819406  | -0.295135 |
| O  | 1.355961  | -2.713762 | -0.244421 |
| O  | -1.049278 | -1.144831 | -1.139268 |
| H  | 0.540064  | 3.064174  | -1.409510 |
| H  | 1.685845  | -0.547351 | 1.902381  |
| H  | 2.760140  | 1.939720  | -1.516711 |
| Mn | -1.824346 | 0.092637  | -0.063485 |
| Mn | 0.405816  | -1.425618 | -0.079893 |
| O  | -3.003903 | -0.372311 | 0.859926  |
| H  | -0.294614 | 2.778040  | 1.062125  |
| H  | -0.520247 | 0.552036  | 2.019832  |
| O  | 3.601061  | 0.303405  | 0.350147  |
| H  | -2.035668 | -0.298126 | -1.539607 |

19

**T15-16**

|    |           |           |           |
|----|-----------|-----------|-----------|
| C  | 2.622153  | 0.024857  | -0.270836 |
| C  | 2.249787  | 1.401774  | -0.680817 |
| C  | 1.261051  | 2.094512  | -0.082996 |
| C  | 0.408319  | 1.552831  | 1.028195  |
| C  | 0.658022  | 0.093221  | 1.363404  |
| C  | 1.751649  | -0.617083 | 0.749603  |
| O  | -1.013899 | 1.787514  | 0.700725  |
| O  | -0.476297 | -2.571762 | 0.639277  |
| O  | -0.721228 | -0.475257 | -1.418751 |
| H  | 1.039056  | 3.124306  | -0.383206 |
| H  | 2.187632  | -1.494842 | 1.237044  |
| H  | 2.856557  | 1.843045  | -1.475530 |
| Mn | -1.754392 | 0.376264  | -0.293348 |
| Mn | -0.015437 | -1.226179 | -0.002204 |
| O  | -3.299256 | 0.128602  | -0.223695 |
| H  | 0.545381  | 2.180353  | 1.929371  |



|               |           |           |           |
|---------------|-----------|-----------|-----------|
| H             | 0.310486  | -0.219338 | 2.353504  |
| O             | 3.615621  | -0.536881 | -0.732762 |
| H             | -1.238819 | 1.855948  | -0.630022 |
| 19            |           |           |           |
| <b>T16-17</b> |           |           |           |
| C             | -2.667970 | -0.347830 | -0.306325 |
| C             | -1.990461 | -1.557249 | -0.814738 |
| C             | -0.833811 | -2.028315 | -0.268672 |
| C             | -0.203190 | -1.394050 | 0.881908  |
| C             | -0.758204 | -0.132182 | 1.371370  |
| C             | -1.936794 | 0.410397  | 0.740810  |
| O             | 1.246702  | -1.501935 | 0.950760  |
| O             | 0.025337  | 2.655807  | 0.640207  |
| O             | 0.783233  | 0.746529  | -1.327890 |
| H             | -0.339077 | -2.918439 | -0.667701 |
| H             | -2.515017 | 1.193629  | 1.238494  |
| H             | -2.468860 | -2.066098 | -1.655019 |
| Mn            | 1.881916  | -0.260643 | -0.348720 |
| Mn            | -0.220512 | 1.251564  | -0.001427 |
| O             | 3.478194  | -0.168584 | -0.284828 |
| H             | -0.247748 | -2.388593 | 1.936912  |
| H             | -0.425743 | 0.214734  | 2.355067  |
| O             | -3.777054 | 0.000965  | -0.723058 |
| H             | 0.752650  | -2.375116 | 1.878277  |
| 19            |           |           |           |
| <b>T8-9</b>   |           |           |           |
| C             | 0.904213  | 1.451263  | 0.690156  |
| C             | 0.308822  | 2.356919  | -0.289057 |
| C             | -1.023539 | 2.375092  | -0.542809 |
| C             | -1.969546 | 1.386546  | 0.072127  |
| C             | -1.372701 | 0.576454  | 1.214091  |
| C             | 0.031311  | 0.597555  | 1.450208  |
| O             | -2.196500 | 0.307173  | -0.896414 |
| O             | 0.183600  | -1.166829 | -1.122392 |
| H             | -1.440500 | 3.073072  | -1.272401 |
| H             | -2.946742 | 1.829449  | 0.328211  |
| H             | 0.430650  | 0.083006  | 2.328823  |
| H             | 1.874665  | 1.707464  | 1.125022  |

|              |           |           |           |
|--------------|-----------|-----------|-----------|
| H            | 0.977276  | 3.048454  | -0.807069 |
| H            | -2.043277 | 0.199423  | 1.990834  |
| Mn           | -1.195530 | -0.949192 | -0.106903 |
| Mn           | 1.453522  | -0.325447 | -0.212289 |
| O            | -1.914143 | -2.229003 | 0.445644  |
| O            | 3.061819  | 0.043229  | -0.692010 |
| O            | 2.793570  | -0.771804 | 0.854935  |
| 19           |           |           |           |
| <b>T9-10</b> |           |           |           |
| C            | 0.776496  | 1.097397  | 0.715792  |
| C            | 0.408177  | 2.232993  | -0.109170 |
| C            | -0.892401 | 2.500890  | -0.385745 |
| C            | -1.941305 | 1.487952  | -0.032620 |
| C            | -1.597991 | 0.646553  | 1.191574  |
| C            | -0.219670 | 0.436825  | 1.469101  |
| O            | -1.927221 | 0.445665  | -1.093777 |
| O            | 2.477237  | 0.228107  | -1.443367 |
| O            | 0.428846  | -1.477529 | -0.427408 |
| H            | -1.190498 | 3.384931  | -0.953491 |
| H            | 0.074182  | -0.300550 | 2.223937  |
| H            | 1.977386  | 0.665130  | 1.363957  |
| H            | 1.208009  | 2.873173  | -0.490889 |
| Mn           | -1.256998 | -0.907157 | -0.169218 |
| Mn           | 1.788193  | -0.407051 | -0.180000 |
| O            | 2.623789  | -0.392912 | 1.291457  |
| O            | -2.253590 | -2.107174 | 0.121881  |
| H            | -2.962190 | 1.893391  | 0.004738  |
| H            | -2.379089 | 0.354227  | 1.898321  |

**Table S10.** Second Order Perturbation Theory Analysis of Fock Matrix in NBO Basis of structures A1, A2, A3, B1, B2, B3

| Cấu hình   | Donor NBO (i) | Type         | Acceptor NBO (j) | Type       | E(2)-kcal.mol-1 | E(j)-E(i) (au) | F(i,j) (au) |
|------------|---------------|--------------|------------------|------------|-----------------|----------------|-------------|
| A1         | C 3 - C 4     | $\pi$        | LP*( 5)          | Mn 14      | 21.41           | 0.65           | 0.159       |
|            | C 3 - C 4     | $\pi$        | LP*( 2)          | Mn 14      | 14.1            | 0.31           | 0.085       |
|            | C 3 - C 4     | $\sigma$     | LP*( 5)          | Mn 14      | 7.53            | 1.02           | 0.113       |
|            | C 3 - C 4     | $\pi^*$      | LP*( 3)          | Mn 14      | 7.06            | 0.18           | 0.07        |
|            | C 3 - H 9     | $\sigma$     | LP*( 5)          | Mn 14      | 3.34            | 0.87           | 0.07        |
|            | C 4 - H 15    | $\sigma$     | LP*( 5)          | Mn 14      | 3.34            | 0.87           | 0.07        |
| A2         | C 4           | LP ( 1)      | O 13 -Mn 14      | BD*( 3)    | 9.78            | 0.07           | 0.037       |
|            | C 1           | LP*( 1)      | Mn 14            | LP*( 2)    | 9.42            | 0.64           | 0.12        |
|            | C 2 - C 3     | $\pi$        | O 13 -Mn 14      | BD*( 3)    | 9.23            | 0.18           | 0.054       |
|            | C 5 - C 6     | $\pi$        | Mn 14            | LP*( 2)    | 9.08            | 0.75           | 0.106       |
|            | C 4           | LP ( 1)      | Mn 14            | LP*( 2)    | 9.03            | 0.64           | 0.118       |
|            | C 4           | LP ( 1)      | Mn 14            | LP*( 5)    | 8.19            | 0.61           | 0.121       |
|            | C 1           | LP*( 1)      | Mn 14            | LP*( 5)    | 8.13            | 0.61           | 0.12        |
|            | C 1 - C 2     | $\sigma$     | Mn 14            | LP*( 5)    | 7               | 1.1            | 0.112       |
|            | C 3 - C 4     | $\sigma$     | Mn 14            | LP*( 5)    | 6.94            | 1.1            | 0.112       |
|            | C 4 - C 5     | $\sigma$     | Mn 14            | LP*( 5)    | 6.73            | 1.1            | 0.11        |
| C 1 - C 6  | $\sigma$      | Mn 14        | LP*( 5)          | 6.57       | 1.1             | 0.109          |             |
| A3         | C 2 - C 3     | $\sigma$     | C 4 - O 14       | $\sigma^*$ | 3.09            | 0.71           | 0.051       |
|            | C 5 - C 6     | $\sigma$     | C 1 - O 15       | $\sigma^*$ | 3.09            | 0.71           | 0.051       |
|            | C 6 - H 11    | $\sigma$     | C 4 - C 5        | $\sigma^*$ | 2.47            | 0.81           | 0.057       |
|            | C 1 - C 2     | $\sigma$     | C 3 - H 8        | $\sigma^*$ | 1.62            | 0.96           | 0.05        |
|            | C 1 - C 6     | $\sigma$     | C 5 - H 12       | $\sigma^*$ | 1.62            | 0.96           | 0.05        |
|            | C 3 - C 4     | $\sigma$     | C 2 - H 9        | $\sigma^*$ | 1.62            | 0.96           | 0.05        |
|            | C 4 - C 5     | $\sigma$     | C 6 - H 11       | $\sigma^*$ | 1.62            | 0.96           | 0.05        |
|            | C 1 - O 15    | $\sigma$     | Mn 13            | LP*( 2)    | 1.41            | 0.79           | 0.042       |
| C 4 - O 14 | $\sigma$      | Mn 13        | LP*( 2)          | 1.41       | 0.79            | 0.042          |             |
| B1         | C 4           | LP ( 1)      | $\sigma^*$       | C 5 -Mn 16 | 48.03           | 0.1            | 0.126       |
|            | C1            | LP ( 1)      | $\sigma^*$       | C 6 -Mn 17 | 35.94           | 0.49           | 0.197       |
|            | C 2           | LP ( 1)      | $\sigma^*$       | C 1 -Mn 17 | 34.16           | 0.07           | 0.071       |
|            | C 4 -Mn 16    | $\sigma$     | $\sigma^*$       | C 5 -Mn 16 | 33.02           | 0.57           | 0.178       |
|            | C 6           | LP ( 1)      | LP*( 1)          | Mn 17      | 27.17           | 0.23           | 0.118       |
|            | C 5 -Mn 16    | $\sigma^*$   | RY*( 6)          | Mn 17      | 26.28           | 0.06           | 0.14        |
|            | C 1 -Mn 17    | $\sigma^*$   | LP*( 1)          | Mn 17      | 24.22           | 0.13           | 0.101       |
| B2         | C 2-C 3       | $\pi$        | Mn 13            | LP*( 4)    | 13.08           | 0.07           | 0.052       |
|            | C 2-C 3       | $\pi$        | Mn 13            | LP*( 5)    | 12.65           | 0.27           | 0.07        |
|            | C 3           | LP*( 1)      | Mn 13            | LP*( 3)    | 7.71            | 0.37           | 0.09        |
|            | C 2 - C 3     | $\sigma$     | Mn 13            | LP*( 2)    | 7.09            | 0.83           | 0.099       |
|            | C 3           | LP*( 1)      | Mn 13            | LP*( 2)    | 6.97            | 0.38           | 0.086       |
|            | C 2 - H 12    | $\sigma$     | Mn 13            | LP*( 2)    | 4.35            | 0.68           | 0.07        |
|            | C 2           | LP ( 1)      | Mn 13 - O 15     | $\sigma^*$ | 4.24            | 0.29           | 0.055       |
|            | C 3 - H 11    | $\sigma$     | Mn 13            | LP*( 3)    | 3.77            | 0.68           | 0.065       |
|            | C 1 - C 2     | $\sigma$     | Mn 13            | LP*( 2)    | 3.18            | 0.84           | 0.067       |
|            | C 2           | CR ( 1)      | Mn 13            | LP*( 2)    | 3.13            | 9.98           | 0.23        |
| C 2        | LP ( 1)       | Mn 13 - O 16 | BD*( 3)          | 3.04       | 0.32            | 0.05           |             |
| B3         | C 1 - H 17    | $\sigma$     | C 1 - O 8        | $\pi$      | 17.93           | 0.86           | 0.069       |
|            | C 2           | LP ( 1)      | Mn 15            | LP*( 3)    | 16.32           | 0.76           | 0.062       |
|            | C 2 - H 11    | $\sigma$     | Mn 15            | LP*( 4)    | 3.07            | 0.5            | 0.049       |
|            | C 1 - C 2     | $\sigma$     | Mn 15            | LP*( 3)    | 2.74            | 0.71           | 0.056       |

**Table S11.** Theoretical predictions of detailed energies of reactants and intermediates, transition states, and products in the oxidation reaction of the C<sub>6</sub>H<sub>6</sub> and Mn<sub>2</sub>O<sub>3</sub> cluster by the method PBE/6-311++g(d,p) (H, C, O)/LandL2DZ (Mn). ZPE energies are reported unscaled

| Species                        | Single point energy (a.u) | ZPE (a.u) | Etotal (au) | Erelative (kcal.mol <sup>-1</sup> ) |
|--------------------------------|---------------------------|-----------|-------------|-------------------------------------|
| C <sub>6</sub> H <sub>6</sub>  | -231.9948881              | 0.0975380 | -231.897350 |                                     |
| O <sub>2</sub>                 | -150.2295138              | 0.0035290 | -150.225985 |                                     |
| Mn <sub>2</sub> O <sub>3</sub> | -433.3495628              | 0.0092550 | -433.340308 |                                     |

|                                                               |               |            |             |         |
|---------------------------------------------------------------|---------------|------------|-------------|---------|
| H <sub>2</sub>                                                | -1.1658574    | 0.0098350  | -1.156022   |         |
| hydroquinone                                                  | -382.3492791  | 0.1048390  | -382.244440 |         |
| p-benzoquinone                                                | -381.1178449  | 0.0819440  | -381.035901 |         |
| catechol                                                      | -382.3531811  | 0.1051620  | -382.248019 |         |
| o-benzoquinone                                                | -381.1066674  | 0.0819050  | -381.024762 |         |
| I16                                                           | -814.5516306  | 0.0932920  | -814.536859 |         |
| I33                                                           | -814.5281548  | 0.0934940  | -814.536859 |         |
| I34                                                           | -814.5769315  | 0.0938350  | -814.536859 |         |
| T33/34                                                        | -814.49109455 | 0.092151   | -814.536859 |         |
| I25                                                           | -814.56763340 | 0.093741   | -814.536859 |         |
| I17                                                           | -814.55298028 | 0.092946   | -814.536859 |         |
| Mn <sub>2</sub> O <sub>3</sub> +C <sub>6</sub> H <sub>6</sub> | -665.34445089 | 0.106793   | -665.237658 | 0.00    |
| I1                                                            | -665.41575774 | 0.107918   | -665.307840 | -44.04  |
| I2                                                            | -665.39288121 | 0.107979   | -665.284902 | -29.65  |
| I3                                                            | -665.39540081 | 0.10495800 | -665.290443 | -33.12  |
| I4                                                            | -665.38332734 | 0.107233   | -665.276094 | -24.12  |
| I5                                                            | -665.38431648 | 0.105339   | -665.278977 | -25.93  |
| I6                                                            | -665.38236470 | 0.107042   | -665.275323 | -23.64  |
| I7                                                            | -665.39392634 | 0.108440   | -665.285486 | -30.01  |
| T1/2                                                          | -665.37556228 | 0.107021   | -665.268541 | -19.38  |
| T1/3                                                          | -665.35199879 | 0.10230600 | -665.249693 | -7.55   |
| T1/5                                                          | -665.34724324 | 0.101724   | -665.245519 | -4.93   |
| T2/7                                                          | -665.36676236 | 0.106430   | -665.260332 | -14.23  |
| T3/4                                                          | -665.36106411 | 0.105005   | -665.256059 | -11.55  |
| T5/6                                                          | -665.32837194 | 0.104003   | -665.224369 | 8.34    |
| I7+O <sub>2</sub>                                             | -815.62344012 | 0.111969   | -815.511471 | 0.00    |
| I8                                                            | -815.69710340 | 0.11413200 | -815.582971 | -44.87  |
| I9                                                            | -815.75573928 | 0.116584   | -815.639155 | -80.12  |
| I10                                                           | -815.74170337 | 0.114277   | -815.627426 | -72.76  |
| I11                                                           | -815.79645445 | 0.114568   | -815.681886 | -106.94 |
| I12                                                           | -815.79826610 | 0.114591   | -815.683675 | -108.06 |
| I13                                                           | -815.72432238 | 0.111632   | -815.612690 | -63.52  |
| I14                                                           | -815.73275877 | 0.114504   | -815.618255 | -67.01  |
| I15                                                           | -815.72880681 | 0.112064   | -815.616743 | -66.06  |
| I16                                                           | -815.74674734 | 0.116115   | -815.630632 | -74.77  |
| I17                                                           | -814.55298028 | 0.092946   | -814.460034 | 659.79  |
| T8/9                                                          | -815.66214072 | 0.113950   | -815.548191 | -23.04  |
| T9/10                                                         | -815.68630212 | 0.109725   | -815.576577 | -40.85  |

|                    |               |            |             |         |
|--------------------|---------------|------------|-------------|---------|
| T10/11             | -815.68265808 | 0.112329   | -815.570329 | -36.93  |
| T11/12             | -815.75227518 | 0.113166   | -815.639109 | -80.09  |
| T12/13             | -815.70414637 | 0.11021100 | -815.593935 | -51.75  |
| T13/14             | -815.71202914 | 0.111296   | -815.600733 | -56.01  |
| T14/15             | -815.69419175 | 0.109609   | -815.584583 | -45.88  |
| T15/16             | -815.70230463 | 0.111387   | -815.590918 | -49.85  |
| T16/17             | -815.64810807 | 0.104643   | -815.543465 | -20.08  |
| PR1                | -815.63326516 | 0.101034   | -815.532231 | -13.03  |
| I2+O <sub>2</sub>  | -815.62239499 | 0.111508   | -815.510887 | 0.00    |
| I18                | -815.69256893 | 0.11483900 | -815.577730 | -41.94  |
| I19                | -815.74175172 | 0.11605700 | -815.562628 | -32.47  |
| I20                | -815.73822655 | 0.113714   | -815.558790 | -30.06  |
| I21                | -815.73649615 | 0.115766   | -815.620730 | -68.93  |
| I22                | -815.75826667 | 0.114534   | -815.643733 | -83.36  |
| I23                | -815.72538958 | 0.112245   | -815.613145 | -64.17  |
| I24                | -815.74674729 | 0.116115   | -815.630632 | -75.14  |
| I25+H <sub>2</sub> | -815.73349084 | 0.103576   | -815.629915 | -74.69  |
| T18/19             | -815.68447945 | 0.113774   | -815.570705 | -37.54  |
| T19/20             | -815.67802063 | 0.108980   | -815.569041 | -36.49  |
| T20/21             | -815.69083423 | 0.113243   | -815.577591 | -41.86  |
| T21/22             | -815.72273166 | 0.112091   | -815.610641 | -62.60  |
| T22/23             | -815.68058222 | 0.10841400 | -815.572168 | -38.45  |
| T23/24             | -815.71117240 | 0.110497   | -815.600675 | -56.34  |
| T24/25             | -815.64799090 | 0.10464300 | -815.543348 | -20.37  |
| PR2                | -815.63326516 | 0.101034   | -815.532231 | -13.39  |
| I4+O <sub>2</sub>  | -815.61284112 | 0.110762   | -815.502079 | 0.00    |
| I26                | -815.71150299 | 0.113873   | -815.597630 | -59.96  |
| I27                | -815.70830652 | 0.113694   | -815.577278 | -47.19  |
| I28                | -815.78185285 | 0.114591   | -815.568516 | -41.69  |
| I29                | -815.75488792 | 0.115052   | -815.639836 | -86.44  |
| I30                | -815.76598297 | 0.115691   | -815.650292 | -93.01  |
| I31                | -815.77165060 | 0.116361   | -815.655290 | -96.14  |
| I32                | -815.77967045 | 0.114812   | -815.664858 | -102.15 |
| I33+H <sub>2</sub> | -815.69401226 | 0.103329   | -815.590683 | -55.60  |
| I34+H <sub>2</sub> | -815.74278891 | 0.103670   | -815.639119 | -85.99  |
| T26/27             | -815.70635905 | 0.110380   | -815.595979 | -58.92  |
| T26/31             | -815.65926961 | 0.113067   | -815.546203 | -27.69  |
| T27/28             | -815.69533858 | 0.111670   | -815.583669 | -51.20  |

|                       |               |          |              |        |
|-----------------------|---------------|----------|--------------|--------|
| T28/29                | -815.69948142 | 0.109362 | -815.590119  | -55.25 |
| T29/30                | -815.70179405 | 0.113747 | -815.588047  | -53.95 |
| T31/32                | -815.76745069 | 0.111685 | -815.655766  | -96.44 |
| T31/33                | -815.67478976 | 0.106530 | -815.568260  | -41.53 |
| T32/33                | -815.66596753 | 0.105103 | -815.5608645 | -36.89 |
| T33/34+H <sub>2</sub> | -815.65695199 | 0.101986 | -815.5549660 | -33.19 |
| PR4                   | -815.62208765 | 0.100995 | -815.5210927 | -11.93 |
| PR3                   | -815.70274395 | 0.114417 | -815.5883270 | -54.12 |
| I6+O <sub>2</sub>     | -815.61187848 | 0.110571 | -815.5013075 | 0.00   |
| I35                   | -815.70790882 | 0.113939 | -815.5939698 | -58.15 |
| I36                   | -815.76565888 | 0.115544 | -815.5969370 | -60.01 |
| I37                   | -815.78194739 | 0.114482 | -815.5609690 | -37.44 |
| I38                   | -815.75257278 | 0.115637 | -815.6369358 | -85.11 |
| T35/36                | -815.67560542 | 0.112822 | -815.5627834 | -38.58 |
| T36/37                | -815.70500752 | 0.109885 | -815.5951225 | -58.87 |
| T37/38                | -815.70456684 | 0.114260 | -815.5903068 | -55.85 |
| PR1                   | -815.70274395 | 0.114417 | -815.5883270 | -54.61 |
| I1+O <sub>2</sub>     | -815.64527152 | 0.111447 | -815.5338245 | 0.00   |
| I39                   | -815.69371054 | 0.114681 | -815.5790295 | -28.37 |
| I40                   | -815.75549522 | 0.114911 | -815.6405842 | -66.99 |
| I41                   | -815.69194829 | 0.110692 | -815.5812563 | -29.76 |
| I42                   | -815.75448750 | 0.115623 | -815.6388645 | -65.91 |
| I43                   | -815.69531705 | 0.113011 | -815.5823061 | -30.42 |
| I44                   | -815.76227097 | 0.115897 | -815.6463740 | -70.63 |
| T39/40                | -815.68391526 | 0.113157 | -815.5707583 | -23.18 |
| T40/41                | -815.68415018 | 0.107951 | -815.5761992 | -26.59 |
| T41/42                | -815.68485819 | 0.111555 | -815.5733032 | -24.77 |
| T42/43                | -815.68450310 | 0.109179 | -815.5753241 | -26.04 |
| T43/44                | -815.68454967 | 0.112466 | -815.5720837 | -24.01 |
| PR1                   | -815.69884190 | 0.114094 | -815.5847479 | -31.95 |

---

|                                                                                     |                                                                                      |                                                                                       |
|-------------------------------------------------------------------------------------|--------------------------------------------------------------------------------------|---------------------------------------------------------------------------------------|
| 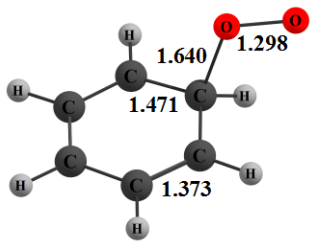   |     |    |
| <b>T0g/1g, 42.07</b>                                                                | <b>I1g, 28.09</b>                                                                    | <b>T1g/2g, 54.49</b>                                                                  |
|    |     |    |
| <b>I2g, 14.41</b>                                                                   | <b>T2g/3g, 47.60</b>                                                                 | <b>I3g, 12.36</b>                                                                     |
|   |    |   |
| <b>T3g/4g, 14.65</b>                                                                | <b>I4g, -23.70</b>                                                                   | <b>T4gP1g, -12.20</b>                                                                 |
|  |                                                                                      |                                                                                       |
| <b>PR1g, -76.77</b>                                                                 |                                                                                      |                                                                                       |
|  |  |  |
| <b>T0g/5g, 53.01</b>                                                                | <b>I5g, 28.40</b>                                                                    | <b>T5g/6g, 47.20</b>                                                                  |

|                                                                                     |                                                                                      |                                                                                       |
|-------------------------------------------------------------------------------------|--------------------------------------------------------------------------------------|---------------------------------------------------------------------------------------|
| 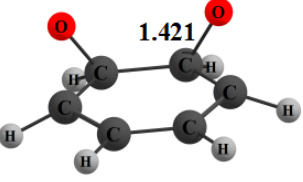   |     |    |
| <b>I6g, -11.34</b>                                                                  | <b>T6g/7g, 52.86</b>                                                                 | <b>I7g, 51.58</b>                                                                     |
|    |    |    |
| <b>T7g/8g, 56.52</b>                                                                | <b>I8g, -33.73</b>                                                                   | <b>T8gP2g, 22.57</b>                                                                  |
|   |    |   |
| <b>T6g/9g, 49.08</b>                                                                | <b>I9g, 35.01</b>                                                                    | <b>T9g/10g, 57.84</b>                                                                 |
|  |   |  |
| <b>I10g, -34.27</b>                                                                 | <b>T10gP2g, 26.83</b>                                                                | <b>PR2g, -77.92</b>                                                                   |
|  |  |  |
| <b>T0/11g, 35.86</b>                                                                | <b>I11g, 28.0</b>                                                                    | <b>T11g/COM, 21.91</b>                                                                |



|                                                                                                               |                                                                                                                                           |                                                                                                       |
|---------------------------------------------------------------------------------------------------------------|-------------------------------------------------------------------------------------------------------------------------------------------|-------------------------------------------------------------------------------------------------------|
| 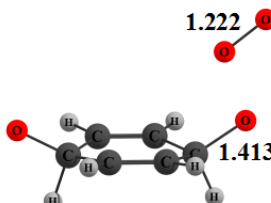<br>1.222<br>1.413           | <br>1.123<br>1.377                                      | <br>1.244<br>1.298 |
| <b>COM, 6.41</b>                                                                                              | <b>I12g, 39.20</b>                                                                                                                        | <b>T12g/13g, 51.59</b>                                                                                |
| <br>1.369                    | <br>1.588<br>1.363                                       | <br>1.379          |
| <b>I13g, 3.63</b>                                                                                             | <b>T13gP4g, 27.14</b>                                                                                                                     | <b>PR4g, -75.99</b>                                                                                   |
| <br>1.201<br>1.276<br>1.276 | <br>1.093<br>1.486<br>1.233<br>1.233<br>+H <sub>2</sub> |                                                                                                       |
| <b>T12gP3g, 49.56</b>                                                                                         | <b>PR3g, -43.04</b>                                                                                                                       |                                                                                                       |

**Figure S1.** Optimized geometries of the intermediates and transition states of the C<sub>6</sub>H<sub>6</sub> + O<sub>2</sub> reaction in the gas phase.

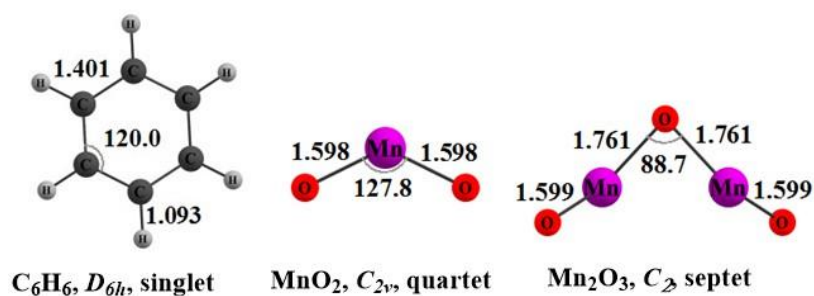

**Figure S2.** The structures, point group symmetry, and the spin multiplicity of MnO<sub>x</sub> and C<sub>6</sub>H<sub>6</sub>

| <b>C<sub>6</sub>H<sub>6</sub>/MnO<sub>2</sub></b>                                                      |                                                                                                                   |                                                                                                                                       |
|--------------------------------------------------------------------------------------------------------|-------------------------------------------------------------------------------------------------------------------|---------------------------------------------------------------------------------------------------------------------------------------|
| 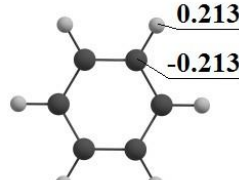<br>0.213<br>-0.213 | <br>0.975<br>-0.487<br>-0.487 | <br>-0.678<br>0.868<br>0.743<br>-0.509<br>-0.425 |
| <b>C<sub>6</sub>H<sub>6</sub>, D<sub>6h</sub>, singlet</b>                                             | <b>MnO<sub>2</sub>, C<sub>2v</sub>, quartet</b>                                                                   | <b>Mn<sub>2</sub>O<sub>3</sub>, C<sub>1</sub>, septet</b>                                                                             |

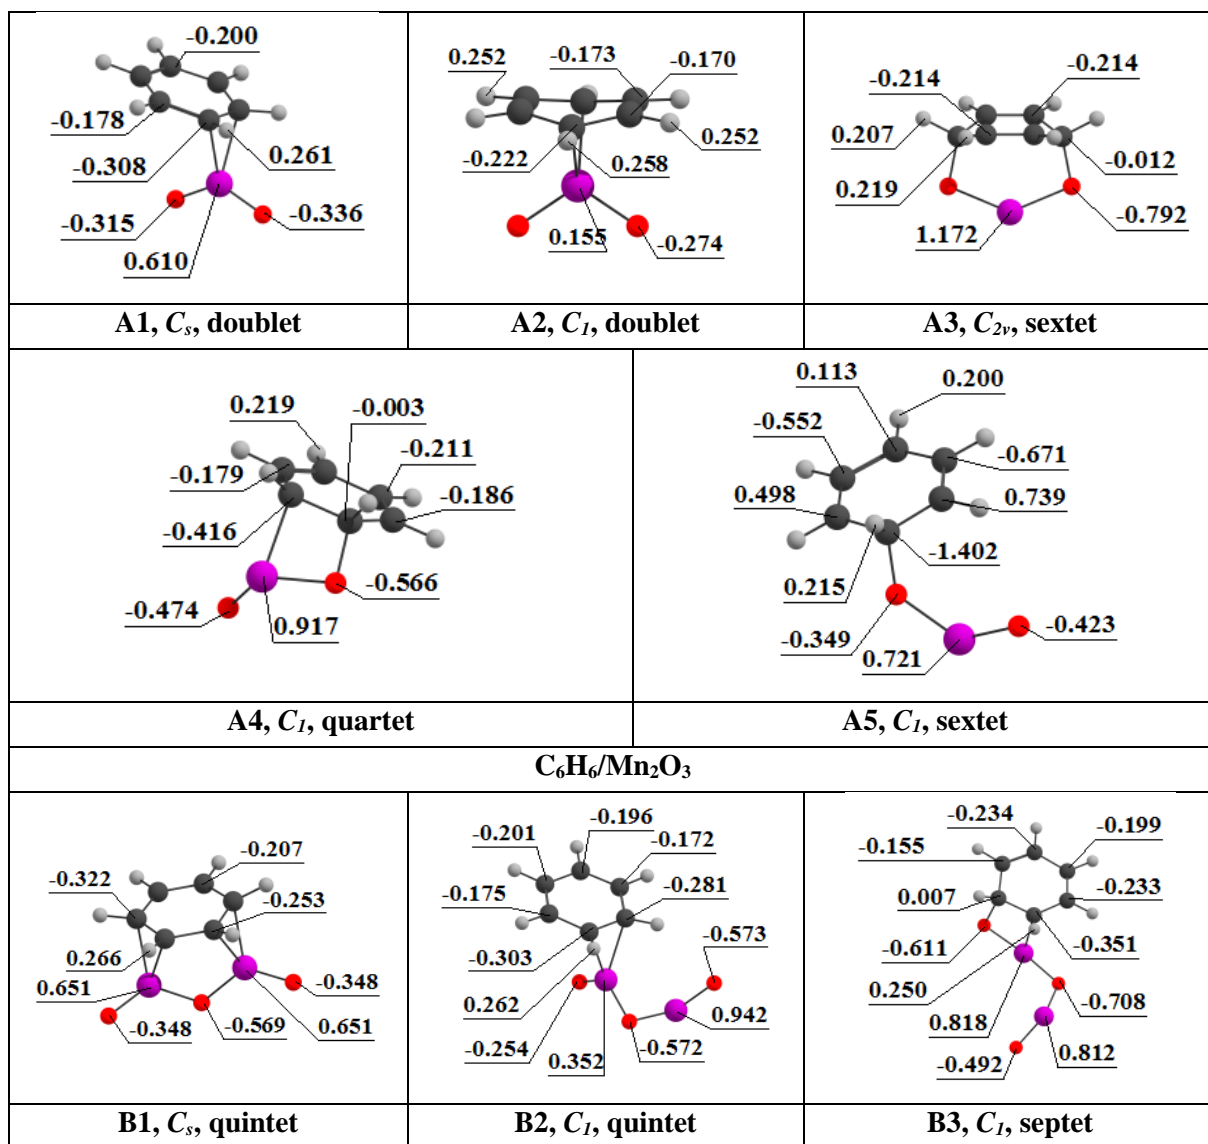

**Figure S3.** The comparison of the atomic charges of the  $C_6H_6/MnO_2$  and  $C_6H_6/Mn_2O_3$  systems obtained by NPA analysis. The unit of the charge is one electron charge  $e$

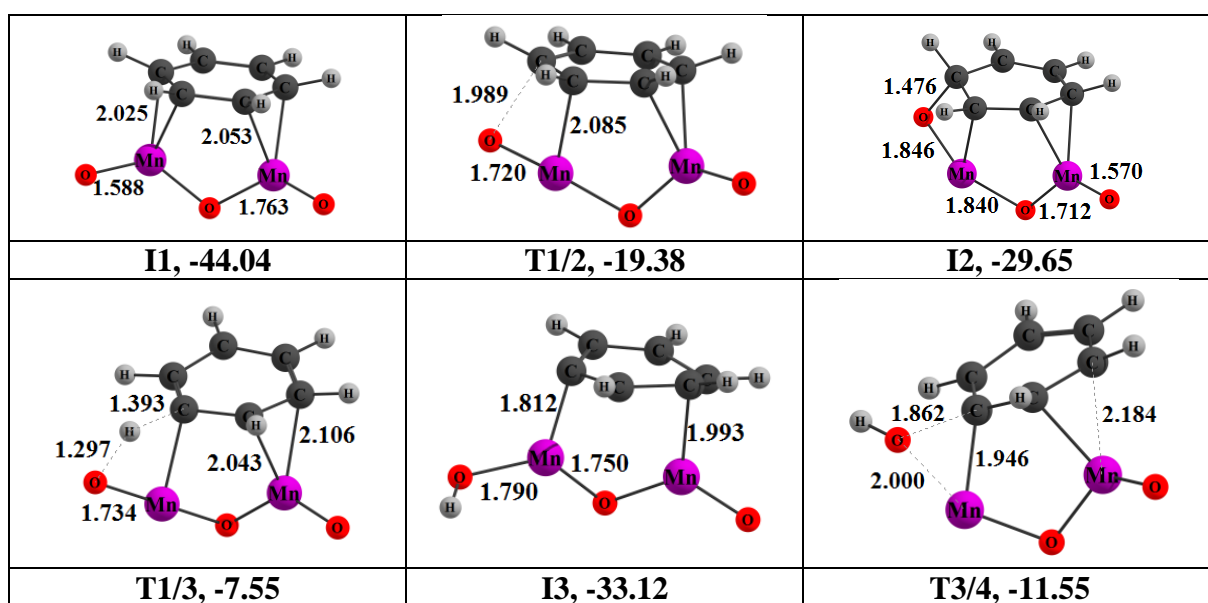

|                                                                                                                                        |                                                                                                                              |                                                                                                                      |
|----------------------------------------------------------------------------------------------------------------------------------------|------------------------------------------------------------------------------------------------------------------------------|----------------------------------------------------------------------------------------------------------------------|
| 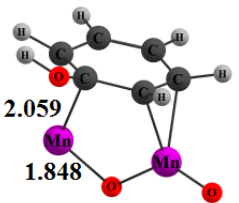 <p>2.059<br/>1.848</p>                               |  <p>1.240<br/>1.440<br/>1.745<br/>1.895</p> |  <p>1.803<br/>1.782<br/>1.783</p> |
| <b>I4, -24.12</b>                                                                                                                      | <b>T1/5, -4.93</b>                                                                                                           | <b>I5, -25.93</b>                                                                                                    |
|  <p>2.004<br/>1.994</p>                               |  <p>1.386<br/>2.046</p>                     |  <p>2.173<br/>1.733<br/>2.062</p> |
| <b>T5/6, 8.34</b>                                                                                                                      | <b>I6, -23.64</b>                                                                                                            | <b>T2/7, -14.23</b>                                                                                                  |
|  <p>1.465<br/>1.781<br/>1.578<br/>1.718<br/>1.836</p> |  <p>2.329<br/>1.876<br/>1.826</p>           |  <p>1.718<br/>1.769<br/>1.770</p> |
| <b>I7, -30.01</b>                                                                                                                      | <b>I8, -44.87</b>                                                                                                            | <b>T8/9, -23.04</b>                                                                                                  |
|  <p>2.044<br/>1.579<br/>1.584</p>                    |  <p>1.405<br/>1.276<br/>1.688</p>          |  <p>1.770<br/>0.975</p>          |
| <b>I9, -80.12</b>                                                                                                                      | <b>T9/10, -37.02</b>                                                                                                         | <b>I10, -71.13</b>                                                                                                   |
|  <p>1.940<br/>1.977</p>                             |  <p>1.465<br/>1.378</p>                   |  <p>1.134<br/>1.321</p>         |
| <b>T10/11, -34.40</b>                                                                                                                  | <b>I11, -83.92</b>                                                                                                           | <b>T11/12, -80.09</b>                                                                                                |
|  <p>0.977<br/>1.790</p>                             |  <p>1.560<br/>1.464</p>                   |  <p>1.526<br/>1.572</p>         |
| <b>I12, -108.06</b>                                                                                                                    | <b>T12/13, -51.75</b>                                                                                                        | <b>I13, -63.52</b>                                                                                                   |

|                                                                                                                      |                                                                                                                               |                                                                                                                                                                                  |
|----------------------------------------------------------------------------------------------------------------------|-------------------------------------------------------------------------------------------------------------------------------|----------------------------------------------------------------------------------------------------------------------------------------------------------------------------------|
| 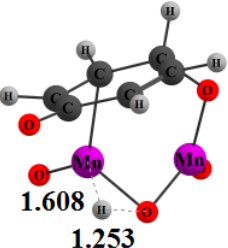 <p>1.608<br/>1.253</p>             |  <p>0.980</p>                                |  <p>1.587<br/>1.381</p>                                                                       |
| <b>T13/14, -56.01</b>                                                                                                | <b>I14, -67.01</b>                                                                                                            | <b>T14/15, -45.88</b>                                                                                                                                                            |
|  <p>1.765<br/>1.505</p>             |  <p>1.351<br/>1.603</p>                      |  <p>1.107<br/>0.979</p>                                                                       |
| <b>I15, -66.06</b>                                                                                                   | <b>T15/16, -49.85</b>                                                                                                         | <b>I16, -74.48</b>                                                                                                                                                               |
|  <p>1.451<br/>1.002</p>            |  <p>1.234<br/>1.329<br/>2.000<br/>1.897</p> |  <p>1.093<br/>1.486<br/>1.233<br/>1.233<br/>1.761<br/>88.7<br/>1.761<br/>1.599<br/>1.599</p> |
| <b>T16/17, -20.06</b>                                                                                                | <b>I17 + H<sub>2</sub>, -65.63</b>                                                                                            | <b>H<sub>2</sub><br/>PR1, -13.03</b>                                                                                                                                             |
|  <p>1.476<br/>2.062<br/>1.846</p> |  <p>1.823<br/>2.629<br/>1.867</p>          |  <p>2.067<br/>1.817<br/>1.758<br/>1.679<br/>1.704</p>                                       |
| <b>I2+O<sub>2</sub>, 0.00</b>                                                                                        | <b>I18, -41.94</b>                                                                                                            | <b>T18/19, -37.54</b>                                                                                                                                                            |
|  <p>1.773<br/>143.8<br/>1.758</p> |  <p>1.390<br/>1.288</p>                    |  <p>1.769<br/>0.977</p>                                                                     |
| <b>I19, -72.04</b>                                                                                                   | <b>T19/20, -36.49</b>                                                                                                         | <b>I20, -71.30</b>                                                                                                                                                               |
|  <p>1.989<br/>1.977</p>           |  <p>1.425<br/>2.053</p>                    |  <p>1.219<br/>1.342</p>                                                                     |
| <b>T20/21, -41.86</b>                                                                                                | <b>I21, -68.93</b>                                                                                                            | <b>T21/22, -62.60</b>                                                                                                                                                            |

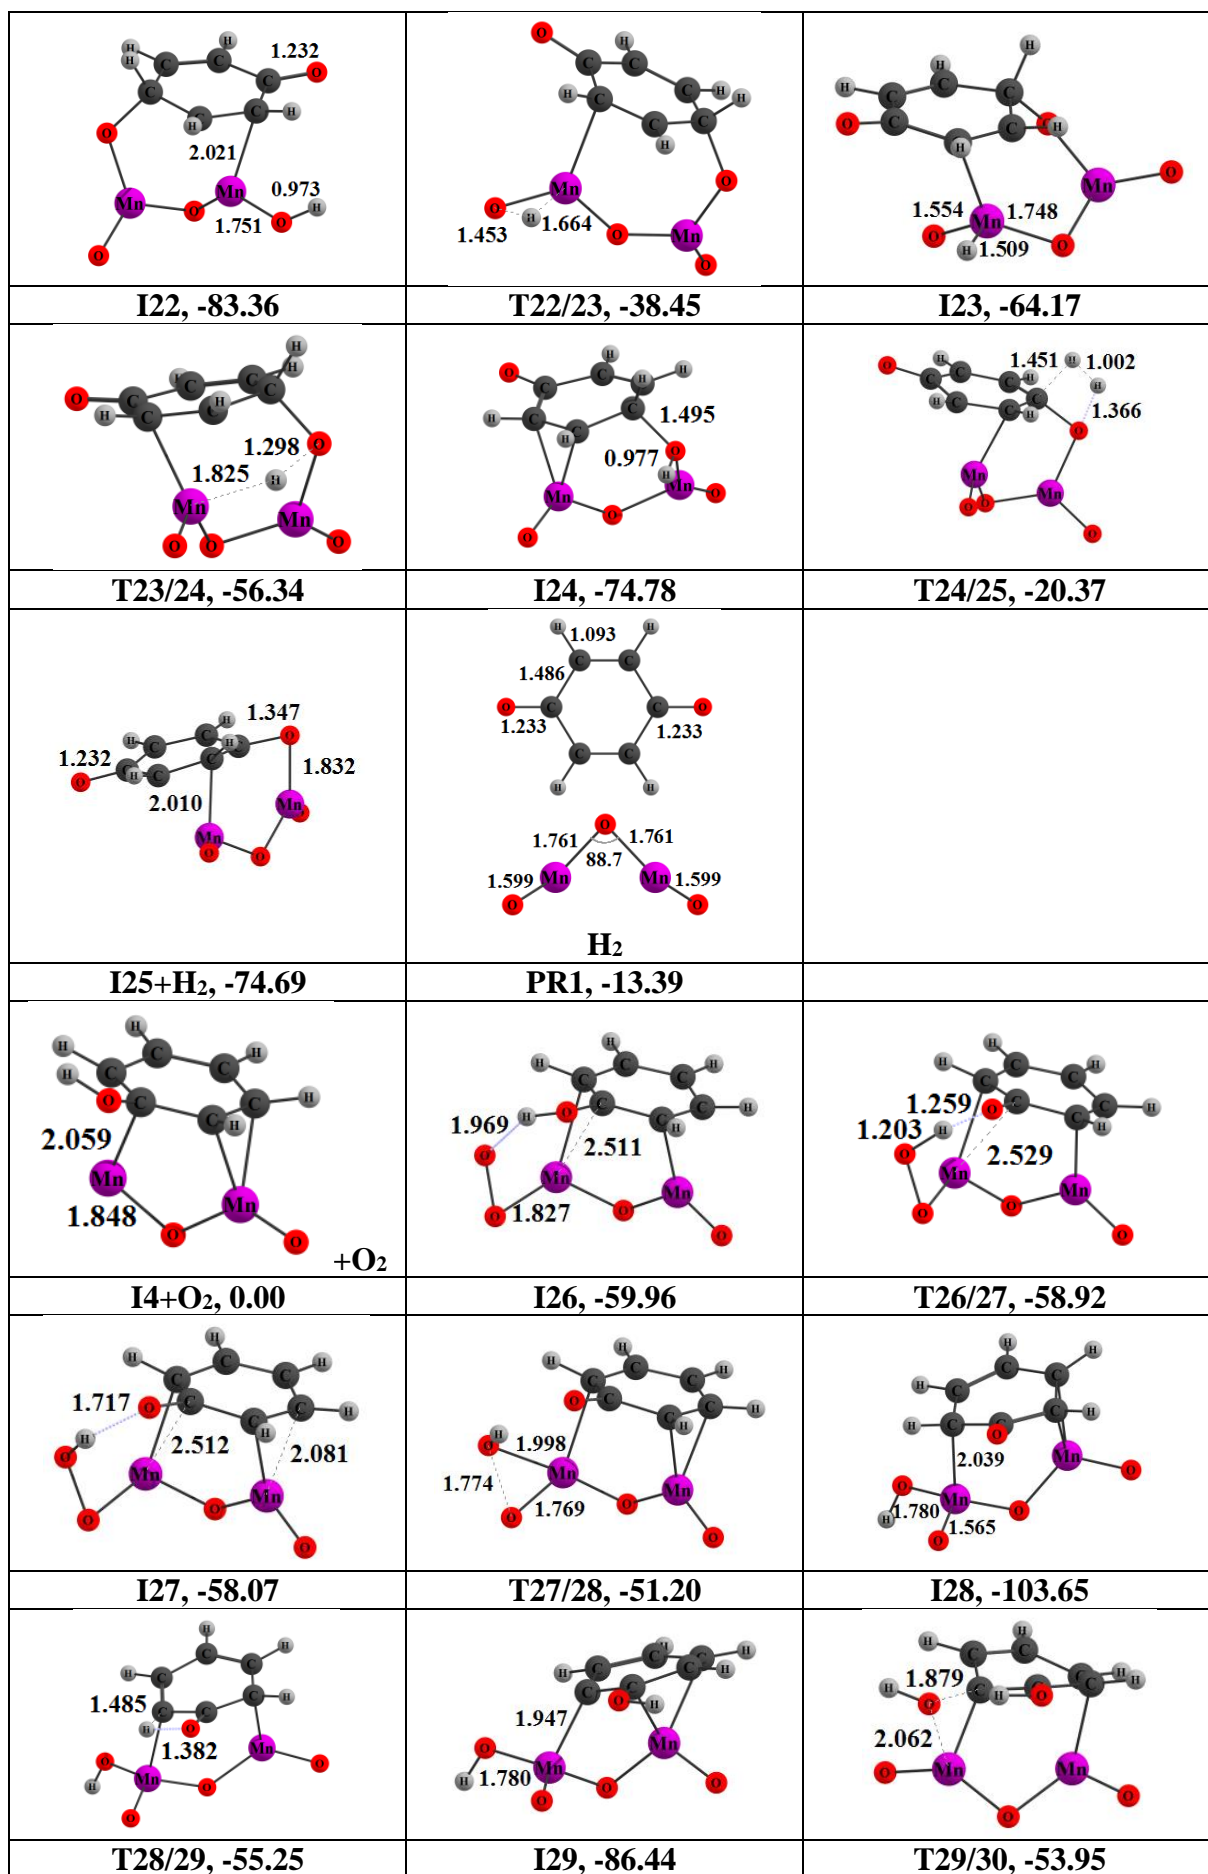

|                       |                       |                       |
|-----------------------|-----------------------|-----------------------|
|                       |                       |                       |
| <b>I30, -93.01</b>    | <b>PR2, -54.12</b>    | <b>T26/31, -27.69</b> |
|                       |                       |                       |
| <b>I31, -96.14</b>    | <b>T31/32, -96.44</b> | <b>I32, -102.15</b>   |
|                       |                       |                       |
| <b>T32/33, -36.89</b> | <b>T31/33, -41.53</b> | <b>I33+H2, -55.60</b> |
|                       |                       |                       |
| <b>T33/34+H2,</b>     | <b>I34+H2, -85.99</b> | <b>PR3, -11.93</b>    |
|                       |                       |                       |
| <b>I1+O2, 0.00</b>    | <b>I39, -28.37</b>    | <b>T39/40, -23.18</b> |
|                       |                       |                       |
| <b>I40, -66.99</b>    | <b>T40/41, -26.59</b> | <b>I41, -29.76</b>    |

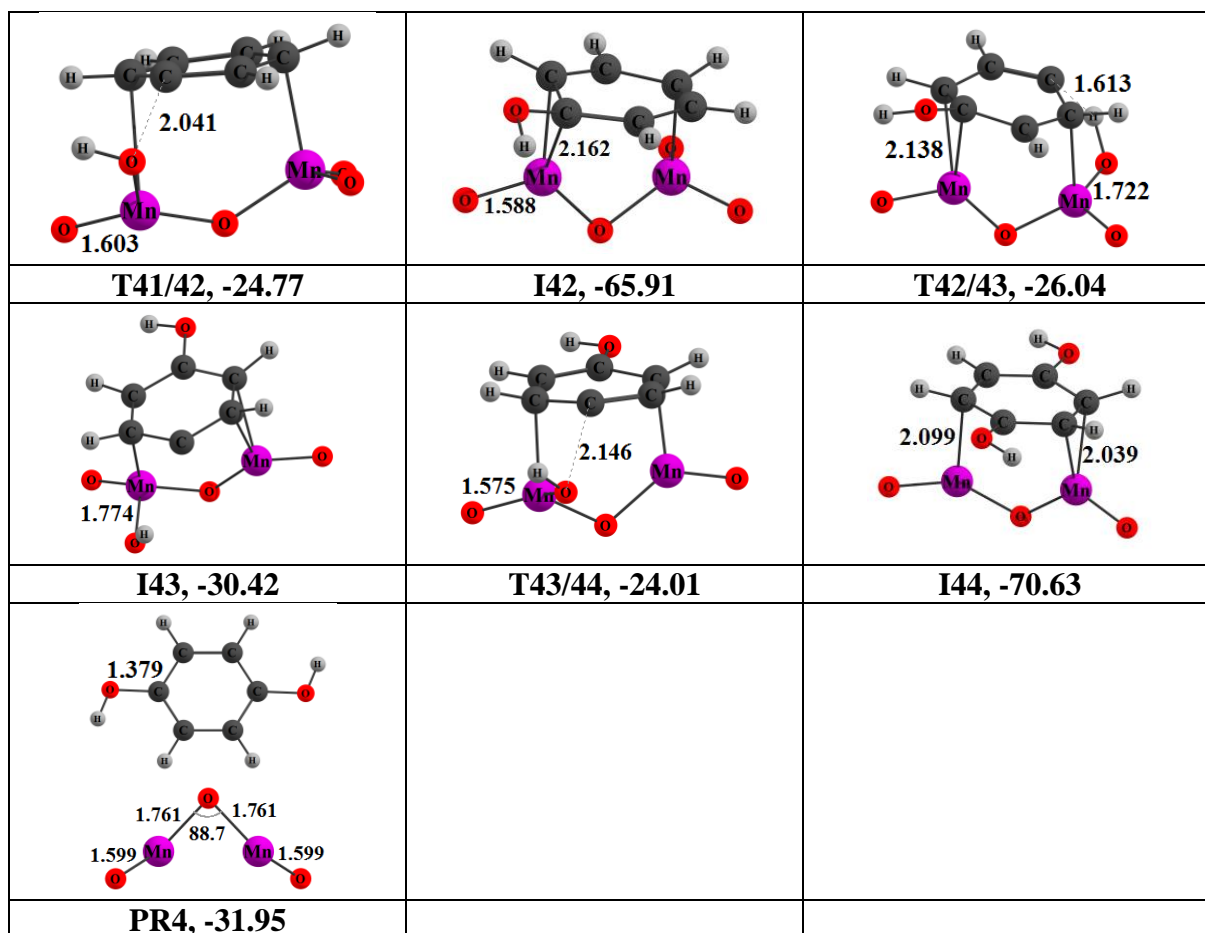

**Figure S4.** Optimized geometries (length is in Å and angle is in degree) of the reactants, transition states, and intermediates of the  $C_6H_6 + O_2$  reaction assisted by the  $Mn_2O_3$  cluster at the PBE/6-311++G(d,p)/LanL2DZ level. (Energy values in parenthesis are in  $kcal.mol^{-1}$ )

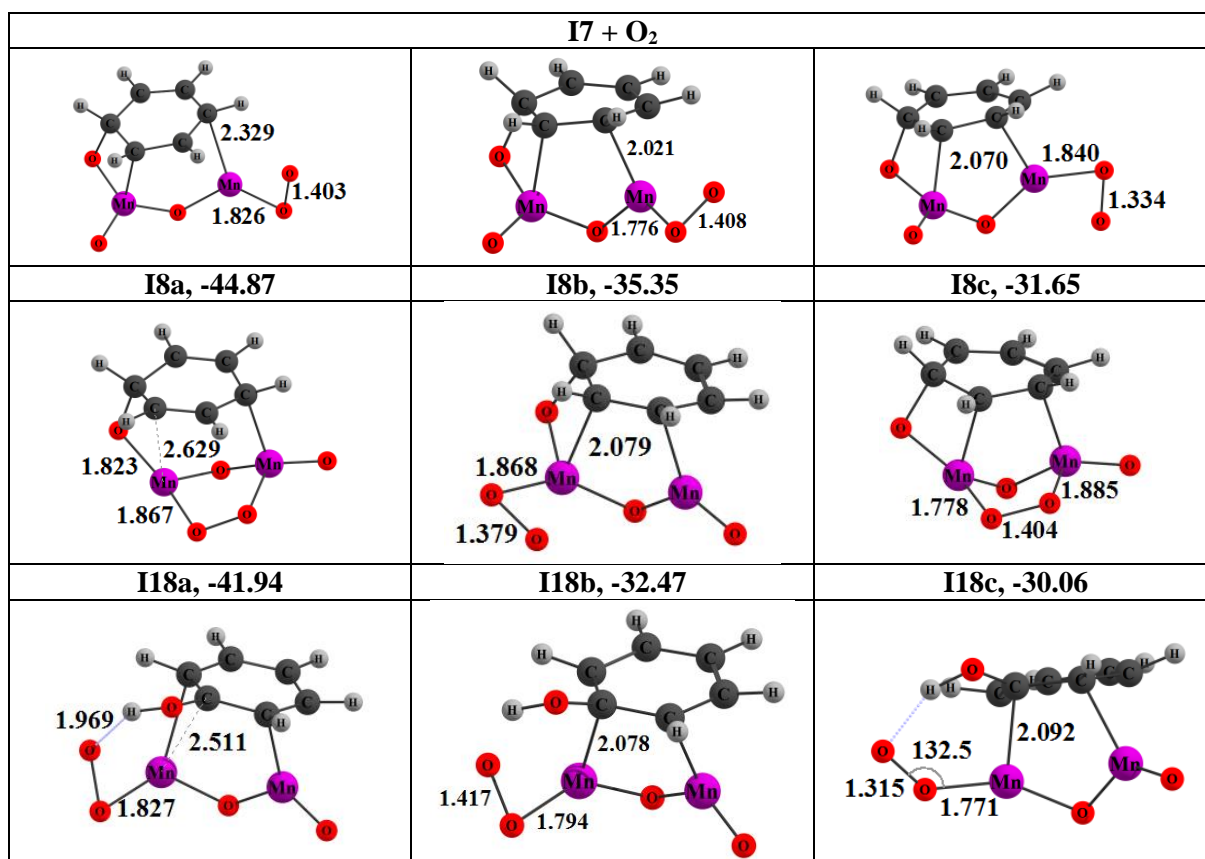

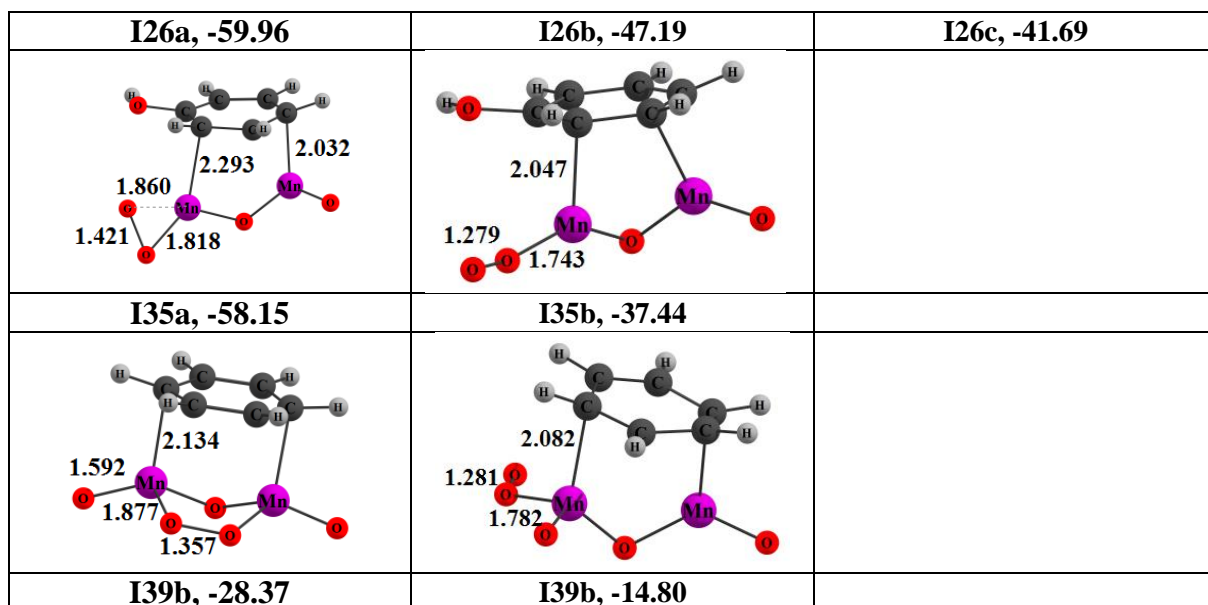

**Figure S5.** The structures and relative energy (kcal.mol<sup>-1</sup>) of interaction configuration when O<sub>2</sub> interact with I7, I2, I4, I6, and I1

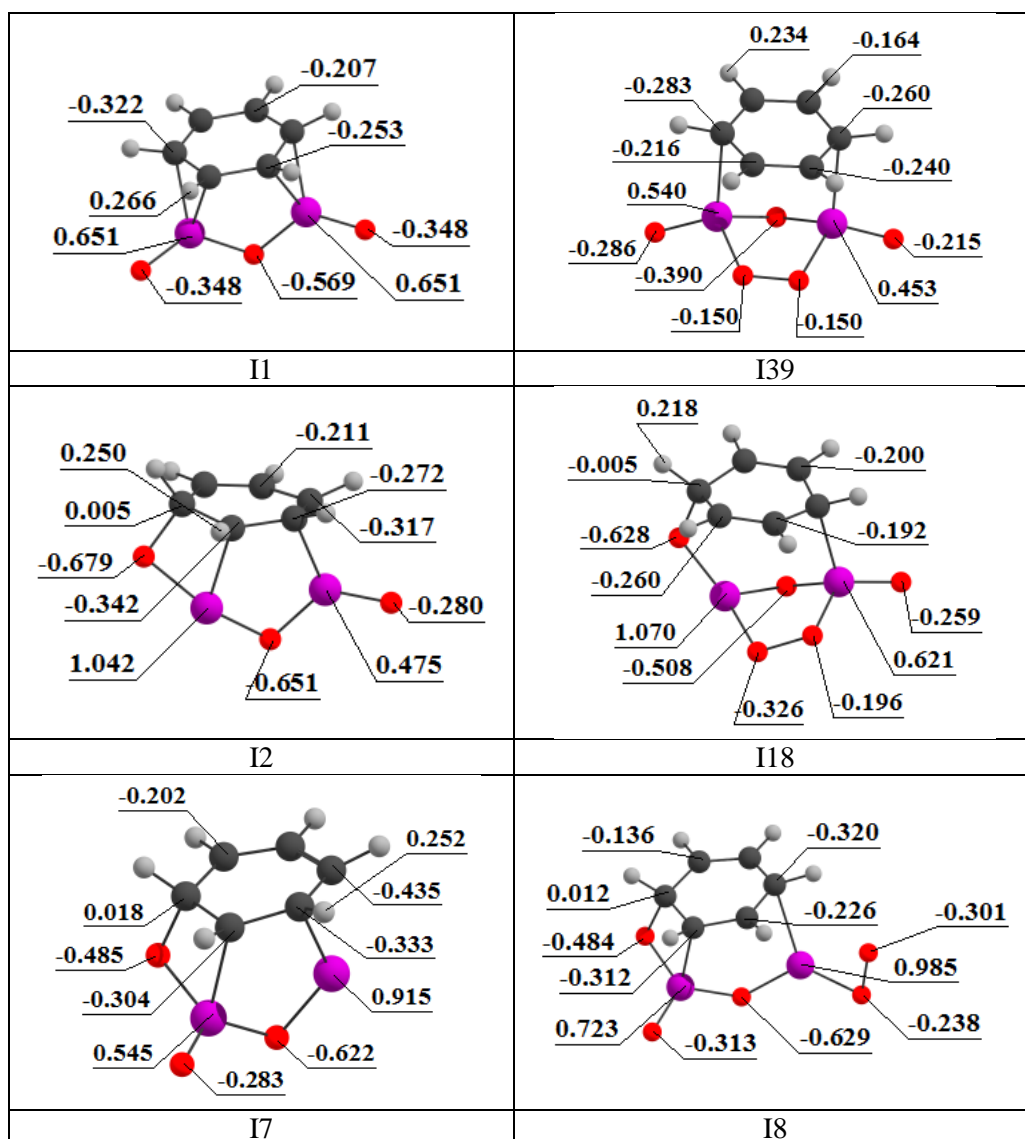



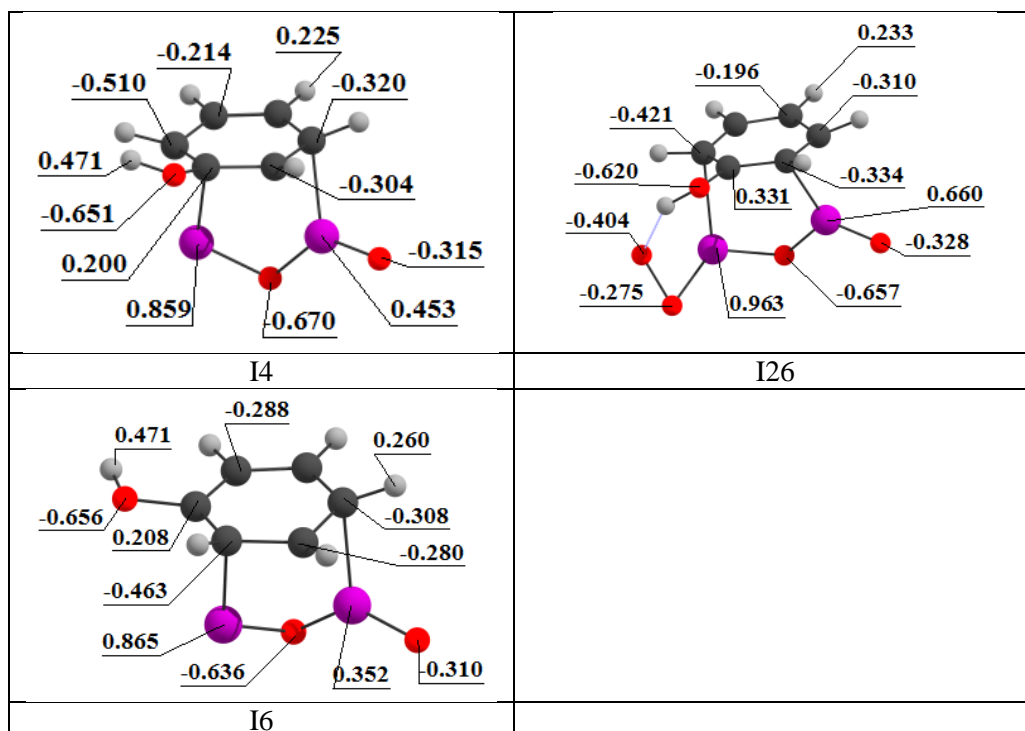

**Figure S6.** Atomic charges obtained by NPA analysis of the structures of transition states, intermediates and products appeared in the paths plotted in Fig. 6. The unit of the charge is one electron charge  $e$

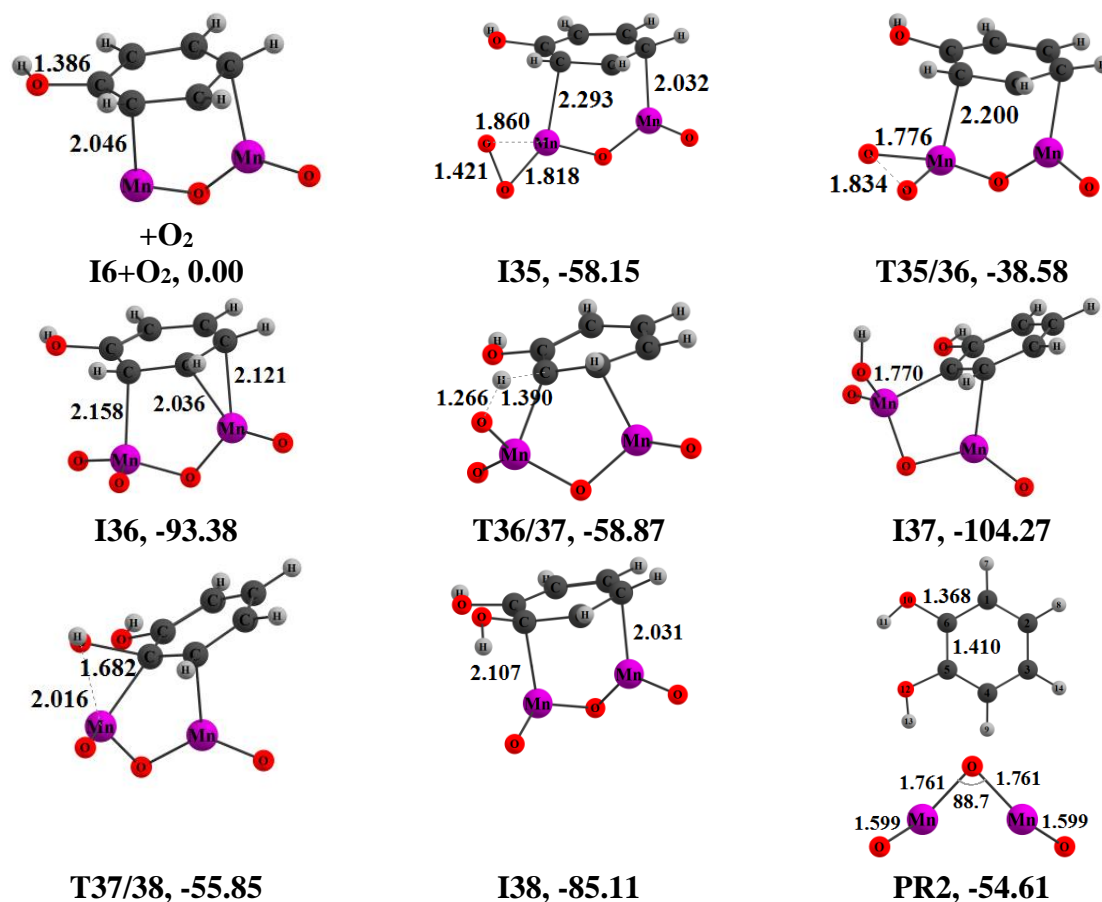

**Figure S7.** Optimized geometries (length is in Å and angle is in degree) of the reactants, transition states and intermediates of I6 + O<sub>2</sub> pathways at the PBE/6-311++G(d,p)/LanL2DZ level. (Energy values in parenthesis are in kcal.mol<sup>-1</sup>)

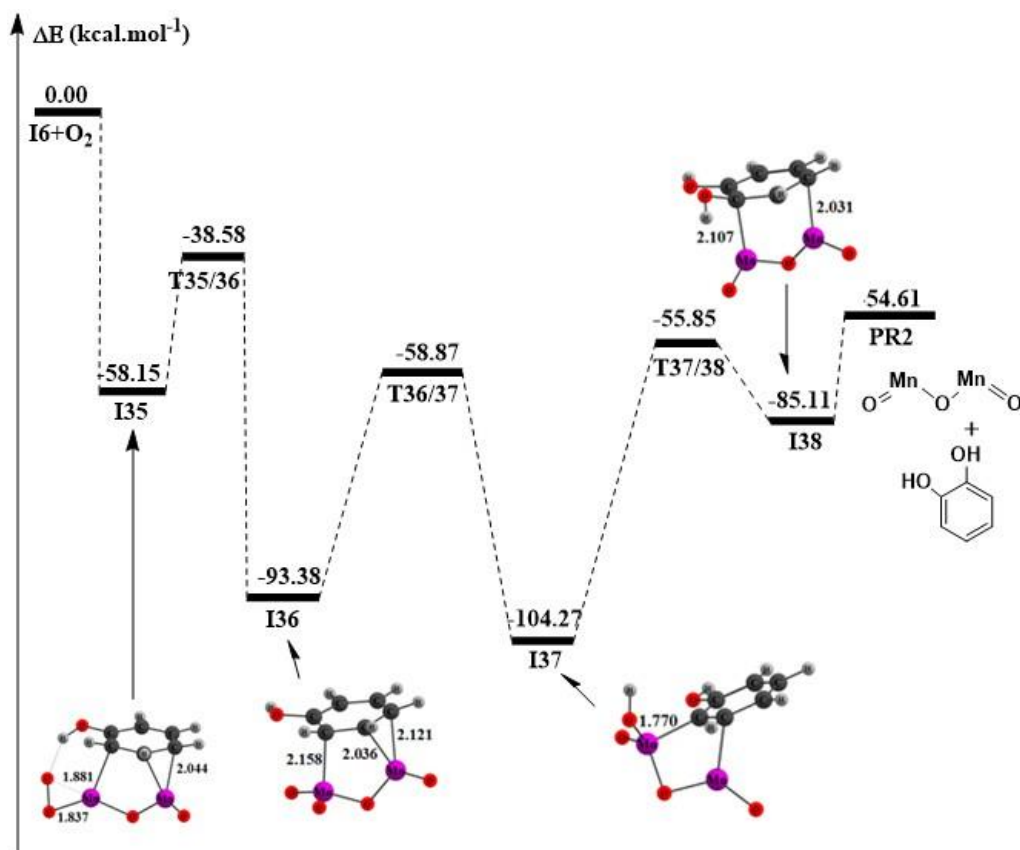

**Figure S8.** Profile of potential energy profile for the subsequent reaction pathways of I6 with O<sub>2</sub> at the PBE/6-311++G(d,p)/LanL2DZ level

### 3.3.2. Subsequent reactions of intermediates with triplet O<sub>2</sub>

#### *Subsequent reactions of I6 with O<sub>2</sub>*

The following paragraphs displayed in italics are only reported in the SI file.

*Similar to I4, the preferential adsorption site of O<sub>2</sub> when interacting with I6 is an unsaturated Mn site, leading to form I35 which lies 58.15 kcal.mol<sup>-1</sup> under the reactants. From I35, I36 is born corresponding to the cleavage O-O bond via T36/37 with a barrier height of 19.57 kcal.mol<sup>-1</sup>. As compared to I35, I36 is more stable as its relative energy is lower than I35 by 35.23 kcal.mol<sup>-1</sup>. After the T36/37, the migration H atom attaches the C site to the O atom forming the structure of I38. In T37/38, the Mn-O bond is stretched to 2.016 Å from 1.770 Å in oxide (see Fig. 12) leading to form I38 which lies at 85.11 kcal.mol<sup>-1</sup> below the reactants and is similar to the geometry of I30. Finally, the catechol molecule in I38 is free from the surface of the oxide with an endothermicity of 38.88 kcal.mol<sup>-1</sup>. The Mn<sub>2</sub>O<sub>3</sub> molecule comes back to the initial state for the next catalytic cycle.*
